# Supplementary material for: Ten-Year Outcomes of Medical Cannabis for Chronic Low Back Pain: Opioid Reduction, Pain Relief, and Functional Improvement in 1,000 Patients
Source: Research Square preprint supplement (doi:10.21203/rs.3.rs-8584281/v1), 2026-02-18
Supplement: Supplementary file 1 [file 1fd55098e001ace2e2c1bf7f.xlsx]

## Sheet: Patient_Data
Subject_ID	Age	Sex	BMI	Pain_Duration_Years	ICD10	Dropout_Year	Completed_Y10
1	77	1	23	35	M48.06	11	TRUE
2	58	1	27	19	M48.06	11	TRUE
3	37	1	28	10	M51.16	9	FALSE
4	46	1	33	11	M51.16	11	TRUE
5	45	1	24	5	M48.06	11	TRUE
6	47	0	36	5	M51.16	7	FALSE
7	67	1	27	22	M48.06	11	TRUE
8	54	1	26	6	M54.51	9	FALSE
9	37	0	23	8	M51.16	11	TRUE
10	59	0	24	21	M54.51	11	TRUE
11	71	0	32	8	M48.06	8	FALSE
12	60	1	28	8	M54.51	11	TRUE
13	34	1	22	10	M51.16	11	TRUE
14	45	0	22	10	M48.06	11	TRUE
15	62	1	26	11	M54.51	11	TRUE
16	42	0	36	6	M48.06	11	TRUE
17	54	1	27	13	M48.06	11	TRUE
18	57	1	24	9	M48.06	11	TRUE
19	40	1	27	12	M48.06	11	TRUE
20	49	0	27	6	M54.51	11	TRUE
21	18	0	25	1	M51.16	11	TRUE
22	21	0	28	3	M51.16	11	TRUE
23	47	0	27	11	M48.06	11	TRUE
24	37	1	31	7	M51.16	4	FALSE
25	45	1	37	7	M54.51	11	TRUE
26	35	1	34	13	M51.16	8	FALSE
27	45	1	27	6	M48.06	11	TRUE
28	51	1	22	14	M48.06	11	TRUE
29	35	1	41	7	M51.16	11	TRUE
30	36	1	28	11	M51.16	8	FALSE
31	61	1	28	9	M48.06	4	FALSE
32	50	0	28	11	M48.06	7	FALSE
33	40	0	29	11	M48.06	11	TRUE
34	54	0	27	9	M51.16	7	FALSE
35	54	1	25	10	M48.06	11	TRUE
36	43	1	25	6	M48.06	11	TRUE
37	50	0	28	12	M48.06	11	TRUE
38	46	1	25	8	M48.06	11	TRUE
39	51	1	24	21	M48.06	11	TRUE
40	56	0	29	7	M48.06	4	FALSE
41	65	0	27	5	M48.06	11	TRUE
42	37	1	36	14	M51.16	11	TRUE
43	71	1	24	17	M51.16	11	TRUE
44	30	1	33	5	M51.16	11	TRUE
45	48	1	34	9	M48.06	5	FALSE
46	55	1	30	9	M48.06	11	TRUE
47	52	1	26	10	M48.06	11	TRUE
48	78	1	26	11	M48.06	11	TRUE
49	47	1	21	6	M54.51	11	TRUE
50	45	0	24	13	M54.51	7	FALSE
51	44	0	22	12	M48.06	11	TRUE
52	88	0	37	12	M48.06	11	TRUE
53	53	1	33	11	M48.06	11	TRUE
54	43	1	34	10	M48.06	11	TRUE
55	58	1	32	12	M48.06	8	FALSE
56	53	0	22	11	M54.51	8	FALSE
57	58	0	25	8	M48.06	11	TRUE
58	56	0	30	25	M54.51	11	TRUE
59	41	0	22	10	M48.06	11	TRUE
60	44	1	32	14	M54.51	9	FALSE
61	57	0	27	6	M48.06	5	FALSE
62	67	0	26	21	M48.06	11	TRUE
63	49	1	32	10	M48.06	11	TRUE
64	51	0	30	10	M48.06	4	FALSE
65	62	1	26	10	M48.06	11	TRUE
66	44	1	34	10	M48.06	7	FALSE
67	67	0	23	9	M48.06	5	FALSE
68	47	1	31	14	M48.06	4	FALSE
69	47	1	31	5	M54.51	11	TRUE
70	60	1	26	7	M48.06	11	TRUE
71	58	0	30	9	M48.06	4	FALSE
72	58	1	22	5	M48.06	11	TRUE
73	63	0	33	9	M48.06	4	FALSE
74	67	0	27	31	M48.06	11	TRUE
75	56	0	25	10	M48.06	11	TRUE
76	46	1	33	10	M54.51	11	TRUE
77	53	0	24	12	M48.06	6	FALSE
78	48	0	21	8	M54.51	7	FALSE
79	65	1	24	8	M54.51	6	FALSE
80	55	0	31	9	M54.51	10	FALSE
81	41	0	22	13	M51.16	11	TRUE
82	70	0	37	45	M48.06	8	FALSE
83	39	0	25	6	M48.06	7	FALSE
84	37	0	36	10	M51.16	11	TRUE
85	61	0	29	11	M54.51	8	FALSE
86	69	1	28	13	M48.06	11	TRUE
87	56	0	25	14	M54.51	5	FALSE
88	56	0	30	6	M48.06	11	TRUE
89	49	1	28	7	M54.51	11	TRUE
90	41	0	34	6	M48.06	11	TRUE
91	45	1	29	9	M48.06	11	TRUE
92	43	0	29	11	M48.06	11	TRUE
93	59	0	26	12	M48.06	11	TRUE
94	55	0	28	9	M48.06	11	TRUE
95	41	0	30	9	M48.06	11	TRUE
96	46	0	31	10	M48.06	11	TRUE
97	54	0	21	7	M54.51	6	FALSE
98	44	0	32	16	M51.16	8	FALSE
99	41	0	29	5	M48.06	11	TRUE
100	52	0	27	10	M54.51	11	TRUE
101	52	0	28	16	M48.06	11	TRUE
102	44	0	30	10	M54.16	9	FALSE
103	45	1	25	9	M54.51	11	TRUE
104	52	1	24	8	M51.16	11	TRUE
105	35	0	29	9	M51.16	11	TRUE
106	55	1	23	14	M54.51	11	TRUE
107	42	1	30	5	M48.06	11	TRUE
108	47	0	26	14	M48.06	5	FALSE
109	59	1	33	5	M48.06	11	TRUE
110	64	1	30	9	M48.06	7	FALSE
111	58	0	29	8	M48.06	5	FALSE
112	48	0	33	11	M48.06	11	TRUE
113	49	1	36	5	M48.06	11	TRUE
114	39	1	33	11	M51.16	11	TRUE
115	49	0	25	16	M51.16	11	TRUE
116	47	0	22	5	M48.06	11	TRUE
117	53	0	25	10	M54.51	11	TRUE
118	41	0	28	8	M51.16	11	TRUE
119	55	1	31	11	M48.06	8	FALSE
120	65	0	24	10	M48.06	11	TRUE
121	58	0	29	8	M48.06	6	FALSE
122	54	1	24	11	M48.06	11	TRUE
123	56	0	25	15	M48.06	11	TRUE
124	45	0	21	9	M48.06	11	TRUE
125	52	1	23	12	M54.16	11	TRUE
126	50	1	21	6	M48.06	11	TRUE
127	50	1	23	7	M48.06	11	TRUE
128	42	1	33	11	M48.06	11	TRUE
129	50	0	23	14	M48.06	11	TRUE
130	54	0	41	11	M54.51	11	TRUE
131	64	1	30	9	M54.51	11	TRUE
132	59	0	29	9	M54.51	11	TRUE
133	71	0	24	6	M48.06	11	TRUE
134	76	0	32	11	M48.06	10	FALSE
135	58	0	25	12	M48.06	11	TRUE
136	51	0	29	8	M48.06	11	TRUE
137	71	0	41	21	M54.51	5	FALSE
138	71	0	28	15	M48.06	6	FALSE
139	41	0	34	8	M48.06	11	TRUE
140	44	1	24	9	M48.06	4	FALSE
141	28	1	28	4	M54.50	11	TRUE
142	44	1	37	9	M48.06	5	FALSE
143	42	1	25	8	M48.06	11	TRUE
144	51	0	37	8	M48.06	11	TRUE
145	75	0	32	12	M48.06	11	TRUE
146	68	1	25	9	M48.06	11	TRUE
147	59	1	31	8	M48.06	11	TRUE
148	82	1	33	13	M48.06	11	TRUE
149	41	0	31	14	M48.06	10	FALSE
150	79	0	31	36	M54.51	11	TRUE
151	43	1	34	21	M48.06	11	TRUE
152	77	0	26	7	M48.06	11	TRUE
153	57	0	32	33	M48.06	11	TRUE
154	76	0	42	43	M54.51	11	TRUE
155	20	0	34	2	M51.16	11	TRUE
156	29	1	26	5	M54.50	9	FALSE
157	50	1	25	21	M48.06	11	TRUE
158	80	0	26	23	M54.51	11	TRUE
159	33	0	29	5	M51.16	10	FALSE
160	40	0	40	4	M48.06	11	TRUE
161	20	0	28	1	M51.16	11	TRUE
162	76	1	31	43	M48.06	11	TRUE
163	28	0	24	5	M54.50	11	TRUE
164	55	0	34	22	M54.51	11	TRUE
165	43	0	24	5	M48.06	11	TRUE
166	57	0	32	20	M48.06	4	FALSE
167	35	0	31	11	M51.16	11	TRUE
168	22	0	38	3	M51.16	11	TRUE
169	29	0	35	5	M54.50	7	FALSE
170	28	0	28	4	M54.50	11	TRUE
171	63	0	37	14	M54.51	11	TRUE
172	39	1	22	10	M51.16	11	TRUE
173	24	0	35	2	M47.26	11	TRUE
174	69	0	34	30	M48.06	11	TRUE
175	33	1	39	10	M51.16	4	FALSE
176	25	1	23	5	M51.16	11	TRUE
177	58	1	42	8	M48.06	11	TRUE
178	20	0	39	2	M51.16	11	TRUE
179	62	0	22	24	M54.51	11	TRUE
180	62	0	26	23	M48.06	11	TRUE
181	37	0	38	4	M51.16	11	TRUE
182	21	0	35	2	M51.16	11	TRUE
183	62	0	42	1	M54.51	11	TRUE
184	36	1	43	14	M51.16	11	TRUE
185	28	0	39	2	M54.50	11	TRUE
186	65	0	37	22	M54.51	11	TRUE
187	22	1	32	3	M51.16	11	TRUE
188	75	0	31	32	M54.51	11	TRUE
189	47	0	43	11	M54.51	11	TRUE
190	59	0	28	13	M54.51	11	TRUE
191	22	0	30	2	M51.16	11	TRUE
192	76	0	22	40	M54.51	11	TRUE
193	20	1	28	2	M51.16	4	FALSE
194	25	0	22	2	M51.16	11	TRUE
195	53	0	30	14	M48.06	11	TRUE
196	54	0	41	22	M48.06	11	TRUE
197	27	0	25	3	M54.59	8	FALSE
198	51	0	24	9	M48.06	11	TRUE
199	35	0	25	2	M51.16	6	FALSE
200	23	0	26	0	M51.16	9	FALSE
201	80	1	38	22	M48.06	11	TRUE
202	28	1	26	3	M54.50	11	TRUE
203	25	0	23	4	M51.16	11	TRUE
204	52	0	33	5	M48.06	11	TRUE
205	37	0	35	18	M51.16	9	FALSE
206	21	0	37	3	M51.16	11	TRUE
207	55	0	26	10	M48.06	11	TRUE
208	50	0	42	8	M48.06	11	TRUE
209	61	0	43	2	M48.06	5	FALSE
210	72	0	25	34	M48.06	6	FALSE
211	33	0	24	11	M51.16	6	FALSE
212	54	0	30	21	M48.06	8	FALSE
213	24	1	34	2	M54.59	10	FALSE
214	38	0	31	10	M51.16	7	FALSE
215	22	0	35	2	M51.16	11	TRUE
216	63	0	25	14	M48.06	6	FALSE
217	28	0	34	5	M54.50	11	TRUE
218	60	0	38	40	M54.51	11	TRUE
219	69	1	33	17	M48.06	6	FALSE
220	57	1	22	33	M48.06	11	TRUE
221	25	0	37	2	M54.59	11	TRUE
222	66	0	39	47	M48.06	11	TRUE
223	30	0	37	4	M51.16	11	TRUE
224	48	0	34	12	M54.51	11	TRUE
225	60	0	25	30	M48.06	11	TRUE
226	32	0	41	3	M51.16	11	TRUE
227	21	1	32	2	M51.16	11	TRUE
228	45	0	33	15	M54.51	5	FALSE
229	70	0	42	52	M51.16	11	TRUE
230	54	1	37	17	M54.51	11	TRUE
231	64	0	33	21	M48.06	11	TRUE
232	50	0	30	21	M48.06	4	FALSE
233	69	1	30	9	M48.06	11	TRUE
234	28	0	25	6	M54.50	11	TRUE
235	25	0	23	4	M51.16	11	TRUE
236	65	0	29	42	M48.06	6	FALSE
237	56	0	31	5	M54.51	11	TRUE
238	46	0	39	24	M54.51	11	TRUE
239	69	1	40	21	M48.06	11	TRUE
240	24	0	23	2	M54.59	6	FALSE
241	31	0	41	2	M51.16	11	TRUE
242	74	0	23	35	M54.51	11	TRUE
243	55	1	27	19	M51.16	3	FALSE
244	34	0	28	10	M51.16	11	TRUE
245	43	1	33	11	M48.06	11	TRUE
246	42	0	25	5	M48.06	8	FALSE
247	44	0	36	5	M48.06	11	TRUE
248	64	0	27	22	M54.51	11	TRUE
249	51	1	26	6	M48.06	7	FALSE
250	34	1	23	8	M51.16	11	TRUE
251	56	1	25	30	M48.06	11	TRUE
252	68	1	32	8	M48.06	4	FALSE
253	57	0	28	14	M48.06	11	TRUE
254	31	0	22	10	M51.16	11	TRUE
255	42	0	22	10	M48.06	11	TRUE
256	59	0	26	11	M48.06	8	FALSE
257	39	0	36	6	M51.16	11	TRUE
258	51	0	27	13	M48.06	11	TRUE
259	54	2	25	9	M48.06	11	TRUE
260	37	0	27	12	M51.16	11	TRUE
261	46	1	27	6	M48.06	9	FALSE
262	15	1	24	1	M51.16	6	FALSE
263	18	1	28	1	M51.16	11	TRUE
264	44	0	27	11	M48.06	11	TRUE
265	34	0	31	7	M51.16	11	TRUE
266	42	1	37	7	M48.06	11	TRUE
267	32	0	34	13	M51.16	8	FALSE
268	42	0	27	6	M48.06	6	FALSE
269	48	1	22	14	M48.06	11	TRUE
270	32	1	41	7	M51.16	11	TRUE
271	33	0	28	11	M51.16	11	TRUE
272	58	0	28	9	M48.06	11	TRUE
273	47	0	28	11	M48.06	11	TRUE
274	37	0	29	2	M51.16	11	TRUE
275	51	0	27	9	M48.06	11	TRUE
276	51	2	25	10	M48.06	11	TRUE
277	40	0	25	6	M48.06	10	FALSE
278	47	0	28	12	M48.06	11	TRUE
279	43	1	25	8	M48.06	11	TRUE
280	48	1	24	21	M48.06	11	TRUE
281	53	1	29	7	M54.51	11	TRUE
282	62	0	27	5	M48.06	5	FALSE
283	34	0	36	14	M51.16	8	FALSE
284	68	0	25	17	M48.06	11	TRUE
285	27	1	33	6	M47.26	11	TRUE
286	45	1	34	9	M48.06	11	TRUE
287	52	1	25	9	M48.06	11	TRUE
288	49	1	26	10	M48.06	7	FALSE
289	75	0	26	11	M48.06	11	TRUE
290	44	1	21	6	M48.06	11	TRUE
291	42	1	24	13	M48.06	11	TRUE
292	41	0	22	12	M48.06	5	FALSE
293	85	1	37	12	M54.51	11	TRUE
294	50	0	33	11	M48.06	5	FALSE
295	40	0	34	10	M48.06	11	TRUE
296	55	1	32	12	M48.06	6	FALSE
297	50	0	22	11	M48.06	11	TRUE
298	55	0	25	8	M54.51	9	FALSE
299	53	0	30	25	M48.06	11	TRUE
300	38	1	22	10	M51.16	7	FALSE
301	41	0	32	14	M51.16	6	FALSE
302	54	1	27	6	M54.51	8	FALSE
303	64	1	26	21	M48.06	11	TRUE
304	46	1	32	10	M48.06	9	FALSE
305	48	0	30	10	M54.51	11	TRUE
306	59	1	26	10	M54.51	11	TRUE
307	41	1	34	10	M48.06	6	FALSE
308	64	0	23	9	M48.06	11	TRUE
309	44	1	31	14	M48.06	11	TRUE
310	44	1	31	5	M48.06	11	TRUE
311	57	1	26	7	M48.06	4	FALSE
312	55	1	30	9	M48.06	11	TRUE
313	55	1	22	5	M54.51	9	FALSE
314	60	1	33	9	M54.51	4	FALSE
315	64	0	27	31	M54.51	11	TRUE
316	53	1	25	10	M51.16	7	FALSE
317	43	1	33	10	M48.06	11	TRUE
318	50	0	24	12	M48.06	6	FALSE
319	45	1	21	8	M51.16	11	TRUE
320	62	0	25	8	M54.51	11	TRUE
321	52	1	31	9	M48.06	7	FALSE
322	38	1	22	13	M51.16	11	TRUE
323	67	1	37	45	M48.06	11	TRUE
324	36	1	25	6	M51.16	11	TRUE
325	34	1	36	10	M51.16	9	FALSE
326	58	1	29	11	M48.06	11	TRUE
327	66	1	28	13	M48.06	11	TRUE
328	53	1	25	14	M48.06	8	FALSE
329	53	1	30	6	M54.51	11	TRUE
330	46	1	28	7	M54.51	7	FALSE
331	38	1	34	6	M51.16	11	TRUE
332	42	0	29	9	M48.06	11	TRUE
333	40	0	29	11	M48.06	7	FALSE
334	56	1	26	12	M54.51	5	FALSE
335	52	0	28	9	M48.06	8	FALSE
336	38	0	30	9	M51.16	6	FALSE
337	43	1	24	10	M48.06	11	TRUE
338	51	0	21	7	M48.06	11	TRUE
339	41	0	32	16	M48.06	11	TRUE
340	38	1	29	5	M51.16	5	FALSE
341	49	1	27	10	M54.51	11	TRUE
342	49	0	28	16	M48.06	11	TRUE
343	41	0	30	10	M48.06	11	TRUE
344	42	1	25	9	M48.06	10	FALSE
345	49	1	24	8	M54.51	11	TRUE
346	32	1	29	9	M51.16	8	FALSE
347	52	1	23	14	M48.06	11	TRUE
348	39	0	30	5	M51.16	7	FALSE
349	44	1	25	14	M48.06	11	TRUE
350	56	1	33	5	M48.06	11	TRUE
351	61	0	30	9	M54.51	11	TRUE
352	55	1	29	8	M48.06	5	FALSE
353	45	1	33	11	M48.06	10	FALSE
354	46	0	36	5	M48.06	5	FALSE
355	36	0	33	11	M51.16	11	TRUE
356	46	0	25	16	M54.51	11	TRUE
357	44	0	22	5	M48.06	4	FALSE
358	50	1	25	10	M48.06	11	TRUE
359	38	1	28	8	M51.16	5	FALSE
360	52	0	31	11	M48.06	11	TRUE
361	62	1	24	10	M48.06	9	FALSE
362	55	1	29	8	M48.06	10	FALSE
363	51	1	24	11	M48.06	11	TRUE
364	53	1	25	15	M48.06	9	FALSE
365	42	1	21	9	M48.06	4	FALSE
366	49	1	23	12	M48.06	11	TRUE
367	47	1	21	6	M54.51	11	TRUE
368	47	1	23	7	M48.06	11	TRUE
369	39	0	33	11	M51.16	10	FALSE
370	47	0	23	14	M54.51	9	FALSE
371	51	0	41	11	M48.06	11	TRUE
372	61	0	30	9	M48.06	10	FALSE
373	56	1	29	9	M54.51	11	TRUE
374	68	1	24	6	M48.06	11	TRUE
375	73	0	32	11	M48.06	11	TRUE
376	55	0	25	12	M54.51	11	TRUE
377	48	0	29	8	M48.06	5	FALSE
378	68	1	41	21	M48.06	11	TRUE
379	68	1	28	15	M48.06	4	FALSE
380	38	1	34	8	M51.16	11	TRUE
381	41	1	24	9	M51.16	11	TRUE
382	25	1	28	2	M54.50	9	FALSE
383	41	1	37	9	M48.06	5	FALSE
384	39	1	25	8	M51.16	6	FALSE
385	48	1	37	8	M54.51	11	TRUE
386	72	1	32	12	M48.06	11	TRUE
387	65	1	25	9	M51.16	11	TRUE
388	56	1	31	8	M48.06	11	TRUE
389	79	1	33	13	M48.06	11	TRUE
390	38	1	31	14	M51.16	11	TRUE
391	76	1	24	36	M48.06	11	TRUE
392	46	1	22	7	M48.06	8	FALSE
393	45	1	26	8	M54.51	11	TRUE
394	48	1	21	7	M48.06	11	TRUE
395	28	0	25	9	M54.50	11	TRUE
396	52	0	24	5	M48.06	10	FALSE
397	67	1	31	6	M48.06	11	TRUE
398	31	1	26	7	M51.16	9	FALSE
399	57	0	27	16	M48.06	11	TRUE
400	51	1	25	15	M48.06	8	FALSE
401	40	1	26	8	M51.16	11	TRUE
402	76	0	22	5	M54.51	11	TRUE
403	50	0	25	3	M48.06	11	TRUE
404	70	1	27	13	M54.16	11	TRUE
405	40	1	26	3	M48.06	11	TRUE
406	62	0	28	18	M51.16	8	FALSE
407	32	0	31	10	M51.16	11	TRUE
408	72	0	22	17	M54.51	11	TRUE
409	70	0	21	17	M48.06	11	TRUE
410	60	2	28	15	M48.06	11	TRUE
411	37	0	21	6	M51.16	10	FALSE
412	65	0	21	15	M48.06	11	TRUE
413	73	0	30	10	M54.51	11	TRUE
414	72	1	25	8	M48.06	7	FALSE
415	61	1	29	3	M48.06	11	TRUE
416	69	0	26	15	M48.06	11	TRUE
417	63	0	22	12	M48.06	11	TRUE
418	65	1	21	5	M54.51	9	FALSE
419	76	1	21	11	M48.06	7	FALSE
420	48	1	21	5	M48.06	11	TRUE
421	29	0	21	8	M54.50	11	TRUE
422	50	1	28	16	M48.06	11	TRUE
423	22	0	26	2	M51.16	11	TRUE
424	28	0	28	8	M54.50	5	FALSE
425	79	0	30	9	M54.51	11	TRUE
426	26	0	23	3	M54.50	11	TRUE
427	54	1	25	10	M48.06	5	FALSE
428	36	0	23	14	M51.16	5	FALSE
429	48	0	31	3	M54.51	11	TRUE
430	56	0	26	9	M54.51	11	TRUE
431	68	1	23	12	M48.06	7	FALSE
432	64	1	21	16	M48.06	8	FALSE
433	32	0	21	7	M51.16	11	TRUE
434	42	0	30	7	M48.06	7	FALSE
435	44	0	26	8	M48.06	11	TRUE
436	73	0	22	8	M48.06	11	TRUE
437	78	0	28	9	M48.06	11	TRUE
438	48	0	22	13	M48.06	6	FALSE
439	63	0	25	4	M54.51	11	TRUE
440	35	0	23	10	M51.16	11	TRUE
441	30	1	23	8	M51.16	6	FALSE
442	53	2	23	7	M54.51	11	TRUE
443	30	1	24	5	M51.16	11	TRUE
444	30	0	30	8	M51.16	5	FALSE
445	59	0	26	14	M48.06	11	TRUE
446	29	0	25	8	M54.50	6	FALSE
447	57	1	29	7	M48.06	5	FALSE
448	43	0	29	7	M48.06	11	TRUE
449	52	0	22	5	M48.06	11	TRUE
450	59	1	27	3	M54.51	10	FALSE
451	34	1	29	12	M51.16	11	TRUE
452	54	1	27	5	M54.51	11	TRUE
453	44	0	31	13	M48.06	8	FALSE
454	35	1	23	6	M51.16	11	TRUE
455	29	0	24	2	M51.16	11	TRUE
456	23	1	31	2	M51.16	11	TRUE
457	31	0	23	8	M51.16	11	TRUE
458	61	1	27	13	M54.51	10	FALSE
459	38	0	29	11	M51.16	11	TRUE
460	27	1	31	7	M47.26	11	TRUE
461	50	1	23	7	M54.51	11	TRUE
462	51	1	25	13	M48.06	11	TRUE
463	64	1	24	15	M54.51	11	TRUE
464	26	1	25	7	M54.50	11	TRUE
465	50	1	22	8	M48.06	11	TRUE
466	41	1	29	9	M48.06	8	FALSE
467	56	1	24	3	M48.06	6	FALSE
468	73	1	22	11	M54.51	11	TRUE
469	42	1	21	14	M48.06	6	FALSE
470	72	1	26	11	M54.51	5	FALSE
471	55	1	22	15	M48.06	11	TRUE
472	54	1	22	12	M48.06	11	TRUE
473	66	1	30	14	M54.51	11	TRUE
474	71	1	23	7	M54.51	11	TRUE
475	64	1	29	8	M48.06	11	TRUE
476	66	1	22	10	M48.06	11	TRUE
477	75	1	24	8	M48.06	11	TRUE
478	33	0	22	11	M51.16	11	TRUE
479	55	0	30	16	M48.06	10	FALSE
480	37	1	30	4	M51.16	8	FALSE
481	33	1	25	5	M51.16	11	TRUE
482	73	1	26	7	M48.06	11	TRUE
483	26	1	29	5	M54.50	4	FALSE
484	56	1	30	7	M48.06	11	TRUE
485	32	1	25	4	M51.16	4	FALSE
486	72	1	30	14	M48.06	11	TRUE
487	30	1	22	5	M51.16	11	TRUE
488	80	1	21	11	M48.06	10	FALSE
489	49	1	27	6	M48.06	11	TRUE
490	54	1	27	13	M54.51	11	TRUE
491	76	1	26	3	M51.16	11	TRUE
492	56	1	22	11	M54.51	9	FALSE
493	79	1	24	13	M48.06	11	TRUE
494	58	1	29	12	M48.06	11	TRUE
495	74	1	23	9	M48.06	5	FALSE
496	62	1	23	11	M48.06	11	TRUE
497	55	1	30	15	M54.51	11	TRUE
498	67	1	31	9	M48.06	11	TRUE
499	67	1	24	6	M48.06	6	FALSE
500	73	1	31	17	M48.06	11	TRUE
501	35	1	28	8	M51.16	4	FALSE
502	69	1	31	9	M48.06	10	FALSE
503	32	1	21	13	M51.16	11	TRUE
504	57	1	27	14	M48.06	11	TRUE
505	23	1	25	4	M51.16	11	TRUE
506	32	1	22	10	M51.16	11	TRUE
507	71	1	24	18	M48.06	11	TRUE
508	43	1	22	9	M48.06	11	TRUE
509	45	1	27	5	M48.06	6	FALSE
510	52	1	24	9	M48.06	11	TRUE
511	75	1	25	5	M54.51	11	TRUE
512	44	1	30	8	M48.06	11	TRUE
513	37	1	23	10	M51.16	11	TRUE
514	42	1	22	9	M48.06	11	TRUE
515	42	1	22	5	M48.06	7	FALSE
516	53	1	23	11	M48.06	11	TRUE
517	62	1	31	5	M54.51	11	TRUE
518	72	1	21	16	M48.06	11	TRUE
519	40	1	23	11	M48.06	11	TRUE
520	76	1	25	10	M48.06	9	FALSE
521	62	1	31	15	M48.06	5	FALSE
522	57	1	26	18	M48.06	11	TRUE
523	70	1	22	9	M48.06	11	TRUE
524	44	1	21	15	M48.06	5	FALSE
525	65	1	28	5	M48.06	6	FALSE
526	50	1	23	7	M54.51	11	TRUE
527	44	1	25	11	M48.06	7	FALSE
528	65	1	29	14	M54.51	11	TRUE
529	68	1	25	16	M48.06	11	TRUE
530	45	1	26	6	M54.51	10	FALSE
531	68	1	30	9	M48.06	9	FALSE
532	57	1	29	9	M54.51	11	TRUE
533	56	1	24	9	M48.06	5	FALSE
534	55	1	23	18	M48.06	7	FALSE
535	25	1	26	4	M54.50	10	FALSE
536	73	1	21	9	M54.51	11	TRUE
537	70	1	27	11	M48.06	4	FALSE
538	29	1	23	5	M51.16	11	TRUE
539	59	1	24	12	M48.06	11	TRUE
540	26	1	24	6	M54.50	6	FALSE
541	23	1	30	2	M51.16	11	TRUE
542	67	1	21	8	M48.06	11	TRUE
543	59	1	23	3	M51.16	4	FALSE
544	69	1	30	6	M48.06	11	TRUE
545	57	1	30	16	M48.06	11	TRUE
546	69	1	28	12	M48.06	5	FALSE
547	69	1	23	12	M48.06	11	TRUE
548	54	1	27	13	M48.06	11	TRUE
549	24	1	27	4	M54.59	9	FALSE
550	45	1	28	12	M48.06	6	FALSE
551	79	1	27	12	M54.51	11	TRUE
552	28	1	29	12	M54.50	11	TRUE
553	42	1	25	7	M48.06	4	FALSE
554	75	1	29	10	M48.06	11	TRUE
555	70	1	23	15	M48.06	11	TRUE
556	22	1	24	3	M51.16	9	FALSE
557	25	1	25	5	M54.50	11	TRUE
558	23	1	21	5	M51.16	11	TRUE
559	51	1	27	18	M48.06	5	FALSE
560	41	1	21	15	M48.06	11	TRUE
561	64	1	29	13	M54.51	11	TRUE
562	55	1	28	5	M54.51	11	TRUE
563	31	1	27	4	M51.16	11	TRUE
564	49	1	24	5	M54.51	11	TRUE
565	53	1	24	11	M48.06	11	TRUE
566	78	1	26	16	M54.51	11	TRUE
567	48	1	28	12	M54.51	11	TRUE
568	59	1	27	15	M54.16	11	TRUE
569	69	1	24	4	M48.06	11	TRUE
570	75	1	25	7	M54.51	8	FALSE
571	62	1	23	7	M54.51	11	TRUE
572	22	1	26	3	M51.16	11	TRUE
573	66	1	31	3	M54.51	11	TRUE
574	55	1	25	13	M48.06	7	FALSE
575	22	1	28	2	M51.16	11	TRUE
576	60	1	30	12	M51.16	11	TRUE
577	38	1	21	9	M51.16	10	FALSE
578	38	1	24	16	M51.16	11	TRUE
579	71	1	22	11	M48.06	11	TRUE
580	54	1	27	14	M48.06	11	TRUE
581	79	1	21	4	M48.06	11	TRUE
582	77	1	26	15	M54.51	9	FALSE
583	73	1	21	15	M48.06	11	TRUE
584	29	1	22	10	M51.16	11	TRUE
585	28	1	30	10	M54.50	4	FALSE
586	44	1	24	10	M48.06	8	FALSE
587	75	1	29	11	M48.06	11	TRUE
588	76	1	31	3	M54.51	11	TRUE
589	46	1	27	12	M54.51	11	TRUE
590	61	1	26	9	M48.06	11	TRUE
591	34	1	27	4	M51.16	11	TRUE
592	55	1	24	11	M48.06	7	FALSE
593	36	1	30	15	M51.16	5	FALSE
594	24	1	29	2	M51.16	11	TRUE
595	76	1	31	4	M48.06	5	FALSE
596	44	1	25	7	M48.06	10	FALSE
597	25	1	24	9	M54.59	11	TRUE
598	30	1	27	12	M51.16	11	TRUE
599	65	0	22	6	M48.06	6	FALSE
600	24	0	23	4	M51.16	5	FALSE
601	55	1	24	8	M54.51	7	FALSE
602	34	1	22	10	M51.16	11	TRUE
603	54	1	21	9	M54.51	11	TRUE
604	64	1	29	16	M48.06	11	TRUE
605	43	1	27	17	M48.06	4	FALSE
606	57	1	27	4	M54.51	11	TRUE
607	44	1	24	5	M48.06	11	TRUE
608	39	1	31	16	M51.16	11	TRUE
609	72	1	29	15	M54.51	11	TRUE
610	37	1	28	7	M51.16	11	TRUE
611	22	1	23	6	M51.16	11	TRUE
612	51	1	31	11	M48.06	11	TRUE
613	35	1	27	11	M51.16	7	FALSE
614	44	1	21	8	M48.06	11	TRUE
615	42	1	22	12	M48.06	11	TRUE
616	79	1	25	4	M51.16	11	TRUE
617	59	1	23	7	M48.06	10	FALSE
618	50	1	28	7	M48.06	4	FALSE
619	65	1	31	11	M48.06	11	TRUE
620	67	1	21	17	M48.06	11	TRUE
621	74	1	31	14	M54.51	11	TRUE
622	65	1	28	17	M54.51	11	TRUE
623	68	1	31	12	M48.06	8	FALSE
624	45	1	21	7	M48.06	6	FALSE
625	40	1	25	12	M48.06	11	TRUE
626	68	1	27	14	M48.06	11	TRUE
627	68	1	22	16	M48.06	11	TRUE
628	77	1	24	16	M48.06	11	TRUE
629	22	1	22	4	M51.16	11	TRUE
630	48	1	26	16	M48.06	11	TRUE
631	71	1	22	12	M54.51	11	TRUE
632	52	1	27	12	M48.06	11	TRUE
633	27	1	23	3	M47.26	10	FALSE
634	66	1	29	13	M48.06	11	TRUE
635	78	1	30	7	M48.06	11	TRUE
636	56	1	24	16	M54.51	5	FALSE
637	71	1	28	18	M48.06	11	TRUE
638	51	1	30	6	M48.06	11	TRUE
639	80	1	27	13	M54.51	11	TRUE
640	50	1	29	4	M48.06	11	TRUE
641	57	1	30	4	M48.06	11	TRUE
642	23	1	27	5	M51.16	11	TRUE
643	70	1	28	5	M48.06	11	TRUE
644	79	1	26	16	M48.06	11	TRUE
645	51	1	28	13	M48.06	11	TRUE
646	33	1	21	5	M51.16	11	TRUE
647	75	1	25	12	M48.06	11	TRUE
648	36	1	22	13	M51.16	11	TRUE
649	80	1	30	4	M48.06	11	TRUE
650	36	0	23	8	M51.16	11	TRUE
651	53	0	22	16	M54.51	11	TRUE
652	79	1	26	10	M54.51	5	FALSE
653	44	1	30	18	M48.06	11	TRUE
654	77	0	29	12	M54.51	7	FALSE
655	65	0	27	14	M48.06	11	TRUE
656	64	1	28	7	M54.51	11	TRUE
657	57	1	22	13	M48.06	4	FALSE
658	44	0	25	10	M48.06	11	TRUE
659	69	1	28	7	M48.06	11	TRUE
660	38	1	27	4	M51.16	9	FALSE
661	66	1	29	3	M48.06	11	TRUE
662	31	0	31	6	M51.16	11	TRUE
663	59	1	24	16	M48.06	11	TRUE
664	47	1	29	7	M48.06	6	FALSE
665	57	0	27	6	M54.51	11	TRUE
666	22	1	29	2	M51.16	11	TRUE
667	75	1	28	3	M54.51	10	FALSE
668	59	0	21	18	M48.06	11	TRUE
669	74	1	26	17	M48.06	7	FALSE
670	62	0	26	3	M48.06	4	FALSE
671	48	1	24	11	M54.51	10	FALSE
672	35	1	27	12	M51.16	11	TRUE
673	43	0	29	7	M48.06	11	TRUE
674	35	2	23	15	M51.16	4	FALSE
675	62	0	27	8	M48.06	11	TRUE
676	51	1	21	15	M48.06	11	TRUE
677	38	1	29	11	M51.16	5	FALSE
678	51	0	26	3	M48.06	11	TRUE
679	58	1	23	13	M48.06	11	TRUE
680	78	2	29	5	M54.51	11	TRUE
681	52	1	25	7	M48.06	4	FALSE
682	61	1	29	11	M54.51	11	TRUE
683	57	1	30	4	M48.06	11	TRUE
684	70	1	30	12	M48.06	11	TRUE
685	54	0	31	17	M48.06	11	TRUE
686	79	1	24	14	M48.06	7	FALSE
687	62	0	26	6	M54.51	6	FALSE
688	32	1	23	9	M51.16	11	TRUE
689	55	0	28	14	M48.06	11	TRUE
690	44	0	31	14	M48.06	11	TRUE
691	34	1	21	9	M51.16	8	FALSE
692	75	0	23	18	M48.06	11	TRUE
693	38	1	28	14	M51.16	11	TRUE
694	72	1	24	7	M48.06	11	TRUE
695	52	1	29	12	M48.06	11	TRUE
696	33	1	22	7	M51.16	4	FALSE
697	29	1	29	10	M51.16	11	TRUE
698	63	1	24	6	M48.06	11	TRUE
699	48	0	25	9	M48.06	11	TRUE
700	57	1	24	13	M54.51	11	TRUE
701	72	0	27	16	M54.51	11	TRUE
702	35	1	22	11	M51.16	11	TRUE
703	57	1	26	18	M48.06	11	TRUE
704	66	0	24	6	M54.51	11	TRUE
705	45	0	21	15	M54.51	11	TRUE
706	39	0	28	13	M51.16	11	TRUE
707	55	0	21	10	M54.51	7	FALSE
708	58	1	31	14	M48.06	11	TRUE
709	20	0	31	2	M51.16	9	FALSE
710	23	0	28	5	M51.16	11	TRUE
711	55	1	29	15	M48.06	11	TRUE
712	72	1	31	12	M48.06	10	FALSE
713	59	1	30	9	M48.06	11	TRUE
714	63	1	29	16	M48.06	10	FALSE
715	69	0	29	8	M48.06	4	FALSE
716	39	0	23	11	M51.16	7	FALSE
717	33	1	30	5	M51.16	11	TRUE
718	71	1	21	5	M54.51	4	FALSE
719	30	0	29	12	M51.16	11	TRUE
720	52	1	23	4	M48.06	4	FALSE
721	74	1	24	14	M51.16	11	TRUE
722	28	1	21	5	M51.16	11	TRUE
723	67	0	31	7	M48.06	11	TRUE
724	41	1	23	11	M48.06	5	FALSE
725	48	1	24	6	M54.51	11	TRUE
726	46	0	27	10	M48.06	11	TRUE
727	30	0	22	10	M51.16	11	TRUE
728	31	0	24	4	M51.16	11	TRUE
729	33	1	27	5	M51.16	11	TRUE
730	23	1	23	3	M51.16	11	TRUE
731	64	1	28	11	M48.06	11	TRUE
732	56	0	24	8	M48.06	11	TRUE
733	77	1	30	5	M48.06	9	FALSE
734	28	1	28	8	M51.16	4	FALSE
735	46	1	28	17	M54.51	11	TRUE
736	61	0	30	7	M48.06	10	FALSE
737	44	0	25	16	M48.06	11	TRUE
738	20	1	29	5	M51.16	11	TRUE
739	57	1	25	15	M54.51	11	TRUE
740	54	1	21	5	M54.51	11	TRUE
741	60	0	24	7	M48.06	11	TRUE
742	37	0	31	14	M51.16	11	TRUE
743	38	1	26	10	M51.16	11	TRUE
744	78	0	24	14	M48.06	11	TRUE
745	78	0	31	14	M54.51	11	TRUE
746	61	1	27	13	M48.06	7	FALSE
747	43	0	26	13	M48.06	8	FALSE
748	40	1	21	10	M51.16	11	TRUE
749	71	1	30	4	M48.06	11	TRUE
750	42	1	24	11	M48.06	11	TRUE
751	37	1	30	8	M51.16	6	FALSE
752	79	1	25	6	M54.51	11	TRUE
753	38	1	23	16	M51.16	11	TRUE
754	61	1	29	15	M54.51	4	FALSE
755	38	1	22	7	M51.16	11	TRUE
756	47	1	31	7	M48.06	11	TRUE
757	65	1	23	9	M54.51	11	TRUE
758	34	1	26	7	M51.16	11	TRUE
759	63	1	26	11	M54.51	9	FALSE
760	27	1	26	5	M47.26	5	FALSE
761	73	0	25	3	M54.51	5	FALSE
762	70	1	23	14	M48.06	11	TRUE
763	55	1	25	17	M54.51	11	TRUE
764	53	0	29	10	M48.06	6	FALSE
765	61	0	25	12	M48.06	11	TRUE
766	28	1	28	3	M51.16	11	TRUE
767	47	0	25	16	M54.51	11	TRUE
768	47	0	24	3	M48.06	10	FALSE
769	53	1	27	10	M54.51	11	TRUE
770	38	1	23	6	M51.16	4	FALSE
771	73	1	21	14	M48.06	11	TRUE
772	49	1	27	17	M48.06	11	TRUE
773	52	1	29	3	M48.06	11	TRUE
774	37	1	30	6	M51.16	11	TRUE
775	38	1	24	14	M51.16	4	FALSE
776	65	1	24	3	M48.06	11	TRUE
777	60	1	27	13	M54.51	11	TRUE
778	20	1	27	2	M51.16	11	TRUE
779	20	1	25	2	M51.16	11	TRUE
780	78	1	28	16	M48.06	11	TRUE
781	58	1	25	3	M48.06	11	TRUE
782	25	1	30	3	M47.26	11	TRUE
783	41	1	29	4	M48.06	11	TRUE
784	28	1	30	3	M51.16	11	TRUE
785	62	1	28	14	M48.06	9	FALSE
786	46	1	31	4	M48.06	11	TRUE
787	30	1	28	6	M51.16	11	TRUE
788	31	1	24	11	M51.16	11	TRUE
789	57	0	30	4	M48.06	8	FALSE
790	30	1	26	8	M54.50	11	TRUE
791	40	1	23	5	M48.06	5	FALSE
792	75	1	21	8	M54.51	11	TRUE
793	52	0	25	11	M48.06	11	TRUE
794	76	0	28	16	M54.51	7	FALSE
795	69	0	30	5	M48.06	4	FALSE
796	66	0	29	18	M48.06	6	FALSE
797	72	1	21	11	M54.51	8	FALSE
798	70	0	29	8	M48.06	11	TRUE
799	78	1	29	16	M54.51	11	TRUE
800	47	1	25	9	M54.51	11	TRUE
801	35	0	23	9	M51.16	4	FALSE
802	46	1	29	15	M48.06	11	TRUE
803	49	0	30	4	M54.51	11	TRUE
804	26	0	28	7	M54.50	11	TRUE
805	77	0	28	18	M48.06	8	FALSE
806	41	0	29	13	M48.06	11	TRUE
807	38	0	31	11	M51.16	11	TRUE
808	62	1	25	6	M54.51	11	TRUE
809	69	0	24	12	M48.06	4	FALSE
810	23	0	31	3	M51.16	11	TRUE
811	28	0	31	4	M54.59	11	TRUE
812	59	0	26	3	M48.06	11	TRUE
813	20	1	23	4	M51.16	11	TRUE
814	50	0	22	17	M54.51	11	TRUE
815	72	1	24	5	M48.06	10	FALSE
816	39	0	26	13	M51.16	11	TRUE
817	56	1	28	9	M48.06	11	TRUE
818	54	1	24	10	M48.06	7	FALSE
819	55	1	28	13	M48.06	11	TRUE
820	38	1	23	8	M51.16	11	TRUE
821	24	1	28	8	M51.16	11	TRUE
822	70	1	26	16	M48.06	11	TRUE
823	34	1	28	8	M51.16	11	TRUE
824	52	1	27	4	M48.06	4	FALSE
825	53	1	24	16	M48.06	11	TRUE
826	29	1	26	3	M51.16	4	FALSE
827	73	1	25	6	M54.51	11	TRUE
828	67	1	22	9	M48.06	4	FALSE
829	26	1	27	2	M54.50	11	TRUE
830	65	1	21	8	M54.51	11	TRUE
831	63	1	25	13	M48.06	9	FALSE
832	37	1	23	5	M51.16	11	TRUE
833	43	1	30	14	M48.06	11	TRUE
834	37	1	28	7	M51.16	11	TRUE
835	21	1	31	2	M51.16	11	TRUE
836	57	1	26	10	M54.51	11	TRUE
837	57	1	24	11	M48.06	11	TRUE
838	47	1	27	8	M48.06	11	TRUE
839	50	1	27	9	M48.06	11	TRUE
840	30	1	24	7	M54.50	11	TRUE
841	68	1	22	11	M48.06	6	FALSE
842	63	0	27	11	M54.51	11	TRUE
843	27	1	31	4	M47.26	11	TRUE
844	63	1	30	14	M48.06	11	TRUE
845	57	1	22	4	M51.16	11	TRUE
846	63	1	25	14	M48.06	6	FALSE
847	68	1	27	16	M48.06	11	TRUE
848	35	0	28	3	M51.16	4	FALSE
849	33	1	26	15	M51.16	11	TRUE
850	44	1	31	6	M48.06	11	TRUE
851	50	1	26	7	M54.51	11	TRUE
852	34	1	21	8	M51.16	11	TRUE
853	71	0	31	13	M54.51	11	TRUE
854	75	0	23	17	M48.06	11	TRUE
855	53	1	26	3	M54.51	11	TRUE
856	50	0	31	10	M48.06	10	FALSE
857	72	1	25	10	M54.51	10	FALSE
858	34	0	29	13	M51.16	11	TRUE
859	52	1	31	18	M48.06	11	TRUE
860	41	1	23	10	M48.06	9	FALSE
861	33	1	30	2	M51.16	11	TRUE
862	45	0	29	7	M48.06	11	TRUE
863	39	1	26	3	M51.16	5	FALSE
864	36	1	25	8	M51.16	9	FALSE
865	76	1	25	8	M48.06	11	TRUE
866	25	1	25	7	M54.59	11	TRUE
867	47	0	29	7	M54.51	11	TRUE
868	41	0	28	5	M48.06	4	FALSE
869	34	0	25	14	M51.16	11	TRUE
870	26	1	30	4	M54.50	7	FALSE
871	51	0	24	15	M48.06	9	FALSE
872	56	0	27	4	M54.51	11	TRUE
873	32	1	26	6	M51.16	11	TRUE
874	58	1	27	8	M48.06	11	TRUE
875	26	0	24	5	M54.50	11	TRUE
876	60	0	31	8	M48.06	11	TRUE
877	20	0	24	2	M51.16	10	FALSE
878	40	1	25	16	M48.06	11	TRUE
879	43	1	30	18	M48.06	11	TRUE
880	30	1	28	5	M54.50	8	FALSE
881	27	0	24	9	M51.16	11	TRUE
882	43	1	25	14	M48.06	11	TRUE
883	24	1	28	3	M51.16	7	FALSE
884	71	1	25	3	M48.06	9	FALSE
885	73	1	24	17	M48.06	11	TRUE
886	65	0	30	15	M48.06	11	TRUE
887	38	0	29	15	M51.16	11	TRUE
888	40	1	25	18	M48.06	11	TRUE
889	54	1	29	5	M48.06	11	TRUE
890	34	1	25	7	M51.16	11	TRUE
891	35	0	30	4	M51.16	11	TRUE
892	70	0	24	10	M48.06	11	TRUE
893	42	1	25	14	M48.06	9	FALSE
894	48	0	29	16	M48.06	9	FALSE
895	69	0	21	5	M48.06	11	TRUE
896	64	1	23	10	M51.16	11	TRUE
897	65	0	29	5	M54.51	11	TRUE
898	23	1	28	3	M51.16	4	FALSE
899	41	0	21	18	M48.06	11	TRUE
900	66	0	31	6	M54.51	11	TRUE
901	39	1	27	12	M51.16	11	TRUE
902	35	0	31	10	M51.16	11	TRUE
903	28	1	29	5	M51.16	11	TRUE
904	65	1	27	8	M48.06	11	TRUE
905	58	0	27	18	M48.06	6	FALSE
906	42	1	21	6	M48.06	11	TRUE
907	33	0	26	15	M51.16	11	TRUE
908	54	0	25	9	M54.51	11	TRUE
909	34	0	25	16	M51.16	5	FALSE
910	71	1	22	5	M54.51	11	TRUE
911	19	0	27	2	M51.16	11	TRUE
912	19	1	21	2	M51.16	11	TRUE
913	30	1	24	10	M54.50	8	FALSE
914	52	1	27	10	M48.06	7	FALSE
915	45	1	22	18	M54.51	5	FALSE
916	47	1	28	15	M48.06	11	TRUE
917	64	0	29	17	M48.06	11	TRUE
918	25	0	28	2	M47.26	8	FALSE
919	35	1	28	3	M51.16	11	TRUE
920	19	1	26	2	M51.16	3	FALSE
921	73	0	21	18	M54.51	3	FALSE
922	21	1	25	2	M51.16	3	FALSE
923	26	0	23	8	M54.50	3	FALSE
924	32	0	28	5	M51.16	3	FALSE
925	42	1	27	8	M48.06	3	FALSE
926	77	1	25	13	M54.51	3	FALSE
927	23	0	26	4	M51.16	3	FALSE
928	64	1	28	8	M54.51	3	FALSE
929	29	1	23	7	M51.16	3	FALSE
930	24	1	24	2	M51.16	3	FALSE
931	28	1	24	2	M54.50	3	FALSE
932	36	1	25	4	M51.16	3	FALSE
933	33	1	28	5	M51.16	3	FALSE
934	39	1	23	8	M51.16	3	FALSE
935	42	1	22	4	M48.06	3	FALSE
936	28	1	23	4	M54.50	3	FALSE
937	45	1	29	5	M48.06	3	FALSE
938	25	1	30	4	M47.26	3	FALSE
939	42	1	26	8	M48.06	3	FALSE
940	27	1	23	6	M51.16	3	FALSE
941	30	1	22	3	M54.50	3	FALSE
942	42	1	21	6	M48.06	3	FALSE
943	40	1	23	2	M51.16	3	FALSE
944	28	1	28	3	M54.50	3	FALSE
945	38	1	22	7	M51.16	3	FALSE
946	29	1	21	7	M54.50	3	FALSE
947	23	1	24	3	M51.16	3	FALSE
948	43	1	21	6	M48.06	3	FALSE
949	35	1	30	6	M51.16	3	FALSE
950	39	1	21	4	M51.16	3	FALSE
951	35	1	23	7	M51.16	3	FALSE
952	33	1	26	3	M51.16	3	FALSE
953	30	1	26	6	M54.50	3	FALSE
954	47	1	25	2	M54.51	3	FALSE
955	41	1	28	8	M48.06	3	FALSE
956	33	1	27	2	M51.16	3	FALSE
957	41	1	22	4	M48.06	3	FALSE
958	25	1	28	3	M47.26	3	FALSE
959	44	1	27	7	M48.06	3	FALSE
960	31	1	27	2	M51.16	3	FALSE
961	32	1	25	7	M51.16	3	FALSE
962	28	1	25	3	M54.59	3	FALSE
963	34	1	27	4	M51.16	3	FALSE
964	47	1	28	6	M48.06	3	FALSE
965	28	1	30	8	M47.26	3	FALSE
966	27	1	26	6	M51.16	3	FALSE
967	36	1	25	6	M51.16	3	FALSE
968	26	1	22	7	M51.16	3	FALSE
969	27	1	23	6	M54.50	3	FALSE
970	32	1	21	4	M51.16	3	FALSE
971	25	1	23	2	M47.26	3	FALSE
972	36	1	25	5	M51.16	3	FALSE
973	46	1	24	8	M54.51	3	FALSE
974	41	1	30	6	M48.06	3	FALSE
975	40	1	30	8	M48.06	3	FALSE
976	36	1	28	2	M51.16	3	FALSE
977	33	1	28	5	M51.16	3	FALSE
978	34	1	27	6	M51.16	3	FALSE
979	31	1	26	4	M51.16	3	FALSE
980	29	1	22	3	M51.16	3	FALSE
981	40	1	24	4	M48.06	3	FALSE
982	38	1	23	3	M51.16	3	FALSE
983	33	1	30	5	M51.16	3	FALSE
984	45	1	25	2	M54.51	3	FALSE
985	29	1	23	5	M51.16	3	FALSE
986	39	1	23	3	M51.16	3	FALSE
987	24	1	27	2	M51.16	3	FALSE
988	32	1	26	5	M51.16	3	FALSE
989	37	1	22	6	M51.16	3	FALSE
990	32	1	27	2	M51.16	3	FALSE
991	27	1	25	6	M54.50	3	FALSE
992	24	1	27	4	M51.16	3	FALSE
993	39	1	30	8	M51.16	3	FALSE
994	29	1	29	2	M51.16	3	FALSE
995	46	1	30	5	M48.06	3	FALSE
996	32	1	25	2	M51.16	3	FALSE
997	39	1	24	5	M51.16	3	FALSE
998	46	1	25	4	M54.51	3	FALSE
999	32	1	23	7	M51.16	3	FALSE
1000	30	1	23	5	M54.50	3	FALSE

## Sheet: Longitudinal_Data
Subject_ID	Visit_Type	Year	MMEQ	NRS	ODI	Cannabis_g_month	THC_g_month	CBD_g_month	SSRI	Benzodiazepines	Tramadol_Tapentadol	Gabapentinoids	AE
1	Baseline	0	30	7	37	0	0	0	1	1	1	1	Inefficient
2	Baseline	0	7	7	60	0	0	0	0	0	0	0
3	Baseline	0	30	7	59	0	0	0	1	1	1	1
4	Baseline	0	14	9	36	0	0	0	0	0	0	0	Inefficient
5	Baseline	0	66	9	49	0	0	0	0	1	1	0
6	Baseline	0	28	9	61	0	0	0	1	1	1	1	Fatigue
7	Baseline	0	105	9	56	0	0	0	1	1	1	1	Fatigue
8	Baseline	0	35	7	66	0	0	0	1	1	1	0	Inefficient
9	Baseline	0	72	7	56	0	0	0	0	0	1	0
10	Baseline	0	108	9	65	0	0	0	1	1	1	0	Insomnia
11	Baseline	0	80	10	62	0	0	0	1	0	1	0	Inefficient
12	Baseline	0	24	8	35	0	0	0	1	1	1	1
13	Baseline	0	8	9	60	0	0	0	1	1	1	0	Inefficient
14	Baseline	0	117	9	37	0	0	0	1	1	1	0
15	Baseline	0	90	10	67	0	0	0	1	1	1	0	Insomnia
16	Baseline	0	42	8	82	0	0	0	1	1	1	1	Inefficient
17	Baseline	0	15	9	74	0	0	0	0	0	0	0	Fatigue
18	Baseline	0	121	9	46	0	0	0	1	1	1	0	Inefficient
19	Baseline	0	96	10	77	0	0	0	1	1	1	0	GastrointestinalNoneSymptoms
20	Baseline	0	12	6	73	0	0	0	0	1	0	0	Inefficient
21	Baseline	0	77	7	43	0	0	0	1	0	1	1	Fatigue
22	Baseline	0	162	9	63	0	0	0	1	1	1	0	Fatigue
23	Baseline	0	15	10	57	0	0	0	0	0	1	0	Fatigue
24	Baseline	0	72	9	70	0	0	0	1	0	1	0
25	Baseline	0	20	9	63	0	0	0	0	0	0	0	Fatigue
26	Baseline	0	66	10	78	0	0	0	0	1	1	0
27	Baseline	0	154	10	53	0	0	0	1	1	1	1
28	Baseline	0	56	6	82	0	0	0	1	1	1	1
29	Baseline	0	28	9	79	0	0	0	0	1	1	0	Fatigue
30	Baseline	0	14	9	66	0	0	0	0	0	0	0	Inefficient
31	Baseline	0	66	9	75	0	0	0	1	1	1	0
32	Baseline	0	28	10	80	0	0	0	1	0	0	1	Fatigue
33	Baseline	0	105	7	74	0	0	0	1	1	1	1	Fatigue
34	Baseline	0	35	7	54	0	0	0	1	1	1	0	Inefficient
35	Baseline	0	72	10	73	0	0	0	0	0	1	0
36	Baseline	0	108	10	76	0	0	0	1	1	1	1
37	Baseline	0	80	9	63	0	0	0	1	0	1	0	Inefficient
38	Baseline	0	24	9	72	0	0	0	1	1	1	1
39	Baseline	0	8	9	36	0	0	0	1	1	1	0	Inefficient
40	Baseline	0	117	7	38	0	0	0	1	1	1	0	Fatigue
41	Baseline	0	90	9	63	0	0	0	1	1	1	0	Insomnia
42	Baseline	0	42	10	68	0	0	0	1	1	1	1	Inefficient
43	Baseline	0	15	9	68	0	0	0	1	0	0	0	Fatigue
44	Baseline	0	121	10	51	0	0	0	1	1	1	0	Inefficient
45	Baseline	0	96	9	43	0	0	0	1	1	1	0	GastrointestinalNoneSymptoms
46	Baseline	0	12	4	41	0	0	0	0	1	0	0	Inefficient
47	Baseline	0	77	10	54	0	0	0	1	0	1	0
48	Baseline	0	162	9	56	0	0	0	1	1	1	0
49	Baseline	0	15	9	57	0	0	0	0	0	0	0	Fatigue
50	Baseline	0	72	10	52	0	0	0	0	0	1	0
51	Baseline	0	20	9	79	0	0	0	0	0	0	0	Fatigue
52	Baseline	0	66	10	38	0	0	0	0	1	1	0
53	Baseline	0	108	6	48	0	0	0	1	1	1	0	Insomnia
54	Baseline	0	14	9	65	0	0	0	0	0	0	0	Inefficient
55	Baseline	0	35	7	60	0	0	0	1	1	1	0	Inefficient
56	Baseline	0	54	10	38	0	0	0	1	1	1	1
57	Baseline	0	18	6	54	0	0	0	1	0	1	1	Fatigue
58	Baseline	0	128	7	36	0	0	0	1	1	1	1	Inefficient
59	Baseline	0	51	5	77	0	0	0	1	1	1	0
60	Baseline	0	40	9	46	0	0	0	1	1	1	1	Inefficient
61	Baseline	0	200	9	52	0	0	0	1	1	1	1
62	Baseline	0	90	7	65	0	0	0	1	1	1	0	Insomnia
63	Baseline	0	28	9	46	0	0	0	1	1	1	0	Fatigue
64	Baseline	0	176	10	50	0	0	0	1	1	1	0
65	Baseline	0	36	9	43	0	0	0	1	1	1	1	Inefficient
66	Baseline	0	42	10	35	0	0	0	1	1	1	1	Inefficient
67	Baseline	0	132	7	37	0	0	0	1	1	1	1	Inefficient
68	Baseline	0	15	9	41	0	0	0	0	1	0	0	Fatigue
69	Baseline	0	120	7	41	0	0	0	1	1	1	0	Inefficient
70	Baseline	0	154	9	58	0	0	0	1	1	1	1
71	Baseline	0	56	9	65	0	0	0	1	1	1	1
72	Baseline	0	28	7	68	0	0	0	0	0	1	0	Fatigue
73	Baseline	0	14	10	82	0	0	0	0	0	0	0	Fatigue
74	Baseline	0	66	9	55	0	0	0	0	1	1	0
75	Baseline	0	28	7	79	0	0	0	1	1	1	0	Fatigue
76	Baseline	0	105	8	72	0	0	0	1	1	1	0	Fatigue
77	Baseline	0	35	8	37	0	0	0	1	1	1	0	Inefficient
78	Baseline	0	72	9	49	0	0	0	0	0	1	0
79	Baseline	0	108	9	65	0	0	0	1	1	1	0	Insomnia
80	Baseline	0	80	8	64	0	0	0	1	0	1	0	Inefficient
81	Baseline	0	24	9	42	0	0	0	1	1	1	0	Dizziness
82	Baseline	0	8	9	52	0	0	0	1	1	1	0	Inefficient
83	Baseline	0	117	5	54	0	0	0	1	1	1	0
84	Baseline	0	90	9	42	0	0	0	1	1	1	0	Insomnia
85	Baseline	0	42	9	55	0	0	0	0	1	1	1	Inefficient
86	Baseline	0	15	10	81	0	0	0	0	0	0	0	Fatigue
87	Baseline	0	121	7	73	0	0	0	1	1	1	0	Inefficient
88	Baseline	0	96	7	81	0	0	0	1	1	1	0	GastrointestinalNoneSymptoms
89	Baseline	0	12	10	50	0	0	0	0	1	0	0	Inefficient
90	Baseline	0	77	9	41	0	0	0	1	0	1	0
91	Baseline	0	162	7	63	0	0	0	1	1	1	1
92	Baseline	0	15	10	54	0	0	0	0	0	0	0	Fatigue
93	Baseline	0	72	9	61	0	0	0	0	1	1	0
94	Baseline	0	20	7	66	0	0	0	0	0	0	0	Fatigue
95	Baseline	0	66	9	68	0	0	0	0	1	1	1
96	Baseline	0	108	8	55	0	0	0	1	1	1	0	Insomnia
97	Baseline	0	14	9	75	0	0	0	0	0	0	0	Inefficient
98	Baseline	0	35	9	67	0	0	0	1	1	1	0	Inefficient
99	Baseline	0	54	8	56	0	0	0	1	1	1	1
100	Baseline	0	18	9	70	0	0	0	1	1	1	1	Fatigue
101	Baseline	0	128	9	73	0	0	0	1	1	1	0	Inefficient
102	Baseline	0	51	10	36	0	0	0	1	1	1	0
103	Baseline	0	40	9	60	0	0	0	1	0	1	1	Inefficient
104	Baseline	0	200	10	45	0	0	0	1	1	1	1
105	Baseline	0	90	9	70	0	0	0	1	1	1	1	Insomnia
106	Baseline	0	28	9	57	0	0	0	1	0	1	0	Fatigue
107	Baseline	0	176	8	44	0	0	0	1	1	1	1
108	Baseline	0	36	9	54	0	0	0	0	1	1	1	Inefficient
109	Baseline	0	42	8	38	0	0	0	1	1	1	1	Inefficient
110	Baseline	0	132	7	63	0	0	0	1	1	1	1	Inefficient
111	Baseline	0	15	7	71	0	0	0	0	0	0	0	Fatigue
112	Baseline	0	120	10	48	0	0	0	1	1	1	0	Inefficient
113	Baseline	0	38	7	67	0	0	0	1	1	1	1	Inefficient
114	Baseline	0	130	7	47	0	0	0	1	1	1	1	Inefficient
115	Baseline	0	10	9	46	0	0	0	0	0	0	0	Fatigue
116	Baseline	0	144	9	40	0	0	0	1	1	1	1	Inefficient
117	Baseline	0	35	9	53	0	0	0	1	1	1	1	Inefficient
118	Baseline	0	27	9	73	0	0	0	1	1	1	1	Fatigue
119	Baseline	0	30	9	40	0	0	0	1	1	1	1
120	Baseline	0	7	9	57	0	0	0	0	0	0	0	Fatigue
121	Baseline	0	30	9	58	0	0	0	1	1	1	1
122	Baseline	0	7	7	75	0	0	0	0	0	0	0	Fatigue
123	Baseline	0	30	10	71	0	0	0	0	1	1	1
124	Baseline	0	7	10	36	0	0	0	0	0	0	0	Fatigue
125	Baseline	0	30	9	48	0	0	0	1	1	1	1
126	Baseline	0	7	8	59	0	0	0	0	0	0	0
127	Baseline	0	30	9	80	0	0	0	0	1	0	0
128	Baseline	0	60	10	36	0	0	0	1	1	1	0
129	Baseline	0	130	9	57	0	0	0	1	1	1	1	Inefficient
130	Baseline	0	10	7	56	0	0	0	0	0	0	0	Fatigue
131	Baseline	0	144	9	35	0	0	0	1	1	1	1
132	Baseline	0	35	7	61	0	0	0	1	1	1	0	Inefficient
133	Baseline	0	27	10	44	0	0	0	1	1	1	1	Fatigue
134	Baseline	0	30	6	71	0	0	0	1	0	1	1	Inefficient
135	Baseline	0	7	10	70	0	0	0	0	1	0	0
136	Baseline	0	97	5	68	0	0	0	1	1	1	1	Fatigue
137	Baseline	0	17	8	70	0	0	0	0	0	0	0	Fatigue
138	Baseline	0	28	7	78	0	0	0	1	1	1	1
139	Baseline	0	56	7	38	0	0	0	1	1	1	1
140	Baseline	0	83	9	45	0	0	0	1	1	1	0
141	Baseline	0	52	9	56	0	0	0	1	1	1	0
142	Baseline	0	55	7	80	0	0	0	1	1	1	1
143	Baseline	0	87	10	80	0	0	0	1	1	1	0
144	Baseline	0	116	10	54	0	0	0	1	1	1	0	Fatigue
145	Baseline	0	98	7	44	0	0	0	1	1	1	1
146	Baseline	0	54	10	40	0	0	0	1	1	1	1
147	Baseline	0	112	10	35	0	0	0	1	1	1	1	Palpitation
148	Baseline	0	87	10	59	0	0	0	1	1	1	1	GastrointestinalNoneSymptoms
149	Baseline	0	12	10	48	0	0	0	1	1	0	0	Inefficient
150	Baseline	0	8	9	52	0	0	0	1	1	1	0	Fatigue
151	Baseline	0	40	10	68	0	0	0	1	1	1	1	Inefficient
152	Baseline	0	26	5	58	0	0	0	0	1	1	0	Fatigue
153	Baseline	0	89	5	67	0	0	0	1	1	1	0
154	Baseline	0	33	7	77	0	0	0	1	1	0	1	Inefficient
155	Baseline	0	90	10	68	0	0	0	1	1	1	0	GastrointestinalNoneSymptoms
156	Baseline	0	81	9	31	0	0	0	1	0	1	0
157	Baseline	0	21	9	45	0	0	0	1	1	1	0	DryNoneMouth
158	Baseline	0	10	8	67	0	0	0	0	1	0	0	Fatigue
159	Baseline	0	101	6	77	0	0	0	1	1	1	1	Insomnia
160	Baseline	0	62	10	32	0	0	0	1	1	1	0
161	Baseline	0	34	6	80	0	0	0	1	1	1	1	Inefficient
162	Baseline	0	16	5	43	0	0	0	1	1	0	1	Fatigue
163	Baseline	0	48	6	64	0	0	0	1	1	1	0	CognitiveNoneSymptoms
164	Baseline	0	51	7	38	0	0	0	1	1	1	0
165	Baseline	0	46	7	54	0	0	0	1	1	1	0	Inefficient
166	Baseline	0	66	5	29	0	0	0	1	1	1	0
167	Baseline	0	30	5	36	0	0	0	1	1	1	1
168	Baseline	0	78	8	59	0	0	0	1	0	1	0
169	Baseline	0	62	7	31	0	0	0	1	1	1	0
170	Baseline	0	85	6	38	0	0	0	1	1	1	0
171	Baseline	0	60	5	27	0	0	0	1	1	1	0
172	Baseline	0	90	9	22	0	0	0	1	1	1	0	Insomnia
173	Baseline	0	66	6	46	0	0	0	0	1	1	0	Hypotension
174	Baseline	0	77	7	41	0	0	0	1	0	1	0
175	Baseline	0	7	6	68	0	0	0	0	1	1	0	Fatigue
176	Baseline	0	39	8	30	0	0	0	1	1	1	1	Inefficient
177	Baseline	0	99	7	84	0	0	0	1	1	1	0
178	Baseline	0	81	6	58	0	0	0	1	0	1	0
179	Baseline	0	14	5	30	0	0	0	0	0	0	0
180	Baseline	0	18	7	41	0	0	0	1	1	0	0	Fatigue
181	Baseline	0	41	10	67	0	0	0	0	1	0	1	Inefficient
182	Baseline	0	22	5	31	0	0	0	1	1	1	1	DryNoneMouth
183	Baseline	0	49	6	25	0	0	0	1	1	1	1
184	Baseline	0	32	6	42	0	0	0	1	1	1	1	Inefficient
185	Baseline	0	109	10	38	0	0	0	1	1	1	1	Insomnia
186	Baseline	0	111	10	55	0	0	0	1	1	1	0	Palpitation
187	Baseline	0	24	5	67	0	0	0	1	1	1	0	Dizziness
188	Baseline	0	10	8	27	0	0	0	0	1	1	0	Fatigue
189	Baseline	0	67	5	44	0	0	0	0	0	1	0
190	Baseline	0	44	10	77	0	0	0	0	1	1	0	Inefficient
191	Baseline	0	116	10	36	0	0	0	1	1	1	0
192	Baseline	0	57	7	57	0	0	0	1	1	1	1
193	Baseline	0	29	9	24	0	0	0	0	1	0	0
194	Baseline	0	50	10	41	0	0	0	1	1	1	0
195	Baseline	0	13	8	21	0	0	0	1	1	1	0	Inefficient
196	Baseline	0	99	8	43	0	0	0	1	1	1	0
197	Baseline	0	26	7	34	0	0	0	1	0	0	1
198	Baseline	0	112	6	76	0	0	0	1	1	1	0
199	Baseline	0	97	5	51	0	0	0	1	1	1	1	Fatigue
200	Baseline	0	95	5	44	0	0	0	1	1	1	0	GastrointestinalNoneSymptoms
201	Baseline	0	118	7	66	0	0	0	1	1	1	0	Insomnia
202	Baseline	0	90	7	26	0	0	0	1	1	1	0	Insomnia
203	Baseline	0	93	8	69	0	0	0	1	1	1	1	Inefficient
204	Baseline	0	12	8	43	0	0	0	1	1	1	0	Inefficient
205	Baseline	0	66	9	63	0	0	0	0	1	1	0
206	Baseline	0	96	6	42	0	0	0	1	1	1	0	GastrointestinalNoneSymptoms
207	Baseline	0	113	9	84	0	0	0	1	1	1	1	GastrointestinalNoneSymptoms
208	Baseline	0	46	8	66	0	0	0	1	1	1	1	Inefficient
209	Baseline	0	117	7	60	0	0	0	1	1	1	0	Insomnia
210	Baseline	0	113	6	41	0	0	0	1	1	1	0
211	Baseline	0	63	6	84	0	0	0	0	1	1	0
212	Baseline	0	99	5	29	0	0	0	1	1	1	1
213	Baseline	0	28	7	70	0	0	0	0	1	0	0	Fatigue
214	Baseline	0	82	8	62	0	0	0	1	0	1	0
215	Baseline	0	100	6	61	0	0	0	1	1	1	0
216	Baseline	0	47	6	66	0	0	0	0	1	1	0	Inefficient
217	Baseline	0	49	8	35	0	0	0	1	1	1	1
218	Baseline	0	61	10	27	0	0	0	1	1	1	0
219	Baseline	0	88	10	75	0	0	0	1	1	1	0	GastrointestinalNoneSymptoms
220	Baseline	0	82	8	77	0	0	0	1	1	1	0
221	Baseline	0	73	8	30	0	0	0	0	0	1	0	Fatigue
222	Baseline	0	63	10	61	0	0	0	0	1	1	0
223	Baseline	0	46	5	32	0	0	0	0	0	1	0	Inefficient
224	Baseline	0	23	5	34	0	0	0	1	1	1	0	Dizziness
225	Baseline	0	47	5	62	0	0	0	1	1	1	0	Inefficient
226	Baseline	0	64	7	64	0	0	0	1	1	1	0
227	Baseline	0	97	9	45	0	0	0	1	1	1	1	Fatigue
228	Baseline	0	53	10	55	0	0	0	1	1	1	0
229	Baseline	0	44	5	80	0	0	0	1	1	0	0	Inefficient
230	Baseline	0	74	7	65	0	0	0	0	0	1	0
231	Baseline	0	21	10	72	0	0	0	1	1	1	1	DryNoneMouth
232	Baseline	0	79	8	55	0	0	0	1	0	1	0	Inefficient
233	Baseline	0	10	10	24	0	0	0	0	1	1	0	Fatigue
234	Baseline	0	113	6	23	0	0	0	1	1	1	0	GastrointestinalNoneSymptoms
235	Baseline	0	56	10	59	0	0	0	1	1	1	1
236	Baseline	0	92	9	68	0	0	0	1	1	1	0	Inefficient
237	Baseline	0	57	7	76	0	0	0	1	1	1	0
238	Baseline	0	40	6	43	0	0	0	0	1	1	1	Inefficient
239	Baseline	0	67	9	38	0	0	0	0	0	1	0
240	Baseline	0	78	5	56	0	0	0	1	0	1	0
241	Baseline	0	31	10	26	0	0	0	1	1	1	0	Inefficient
242	Baseline	0	88	7	54	0	0	0	1	1	1	1
243	Baseline	0	86	7	73	0	0	0	1	1	1	1	GastrointestinalNoneSymptoms
244	Baseline	0	97	7	76	0	0	0	1	1	1	0	Fatigue
245	Baseline	0	19	9	63	0	0	0	0	1	0	0	Fatigue
246	Baseline	0	19	9	72	0	0	0	0	0	0	0	Fatigue
247	Baseline	0	94	9	36	0	0	0	1	1	1	0	GastrointestinalNoneSymptoms
248	Baseline	0	7	9	38	0	0	0	0	1	1	0
249	Baseline	0	11	7	63	0	0	0	1	1	1	0	Fatigue
250	Baseline	0	46	7	68	0	0	0	1	1	1	0	Inefficient
251	Baseline	0	117	9	68	0	0	0	1	1	1	0	Insomnia
252	Baseline	0	10	10	51	0	0	0	0	1	1	0	Fatigue
253	Baseline	0	94	8	43	0	0	0	1	1	1	1	GastrointestinalNoneSymptoms
254	Baseline	0	74	9	41	0	0	0	0	0	1	0
255	Baseline	0	82	9	54	0	0	0	1	1	1	0
256	Baseline	0	63	10	56	0	0	0	0	1	1	0
257	Baseline	0	44	8	57	0	0	0	1	1	1	0	Inefficient
258	Baseline	0	41	9	52	0	0	0	1	1	1	1	Inefficient
259	Baseline	0	107	9	79	0	0	0	1	1	1	1	Fatigue
260	Baseline	0	22	10	38	0	0	0	1	1	1	0	Dizziness
261	Baseline	0	33	6	48	0	0	0	1	0	1	1	Inefficient
262	Baseline	0	112	7	65	0	0	0	1	1	1	0	Fatigue
263	Baseline	0	58	9	60	0	0	0	1	1	1	0
264	Baseline	0	37	10	38	0	0	0	1	0	1	1	Inefficient
265	Baseline	0	78	9	54	0	0	0	1	0	1	0	Inefficient
266	Baseline	0	83	9	36	0	0	0	1	1	1	0
267	Baseline	0	82	10	77	0	0	0	1	1	1	0
268	Baseline	0	91	10	46	0	0	0	1	1	1	0	Insomnia
269	Baseline	0	17	6	52	0	0	0	0	0	0	1	Fatigue
270	Baseline	0	44	10	65	0	0	0	1	1	1	0	Inefficient
271	Baseline	0	90	9	46	0	0	0	1	1	1	1	Insomnia
272	Baseline	0	118	9	50	0	0	0	1	1	1	0	Insomnia
273	Baseline	0	7	10	43	0	0	0	0	1	1	0
274	Baseline	0	10	7	35	0	0	0	0	1	1	0	Fatigue
275	Baseline	0	118	7	37	0	0	0	1	1	1	0	Insomnia
276	Baseline	0	72	10	41	0	0	0	0	0	1	0
277	Baseline	0	119	10	41	0	0	0	1	1	1	0	Insomnia
278	Baseline	0	29	9	58	0	0	0	1	0	1	1
279	Baseline	0	105	9	65	0	0	0	1	1	1	0	Fatigue
280	Baseline	0	107	9	68	0	0	0	1	1	1	0	Fatigue
281	Baseline	0	28	7	82	0	0	0	1	0	1	1	Fatigue
282	Baseline	0	75	9	55	0	0	0	1	0	1	0
283	Baseline	0	85	10	79	0	0	0	1	1	1	0
284	Baseline	0	103	9	72	0	0	0	1	1	1	1	Fatigue
285	Baseline	0	101	10	37	0	0	0	1	1	1	1
286	Baseline	0	28	10	49	0	0	0	0	1	0	1	Fatigue
287	Baseline	0	37	4	65	0	0	0	1	1	1	1	Inefficient
288	Baseline	0	63	10	64	0	0	0	0	1	1	0
289	Baseline	0	80	8	42	0	0	0	1	0	1	0	Insomnia
290	Baseline	0	77	9	52	0	0	0	1	0	1	0
291	Baseline	0	43	10	54	0	0	0	1	1	0	1	Inefficient
292	Baseline	0	70	10	42	0	0	0	0	0	1	0
293	Baseline	0	55	10	55	0	0	0	1	1	1	1	Insomnia
294	Baseline	0	92	6	81	0	0	0	1	1	1	0	Inefficient
295	Baseline	0	34	9	73	0	0	0	0	1	1	1	Inefficient
296	Baseline	0	9	7	81	0	0	0	1	0	0	1
297	Baseline	0	89	10	50	0	0	0	1	1	1	0	GastrointestinalNoneSymptoms
298	Baseline	0	89	6	41	0	0	0	1	1	1	0
299	Baseline	0	50	7	63	0	0	0	1	1	1	0
300	Baseline	0	37	5	54	0	0	0	1	1	1	1	Inefficient
301	Baseline	0	54	9	61	0	0	0	1	1	1	1
302	Baseline	0	13	9	66	0	0	0	1	1	1	0	Inefficient
303	Baseline	0	92	7	68	0	0	0	1	1	1	0	Inefficient
304	Baseline	0	103	9	55	0	0	0	1	1	1	0	Fatigue
305	Baseline	0	8	10	75	0	0	0	1	1	1	1	Inefficient
306	Baseline	0	70	9	67	0	0	0	0	1	1	0
307	Baseline	0	74	10	56	0	0	0	0	0	1	0
308	Baseline	0	105	7	70	0	0	0	1	1	1	0	Fatigue
309	Baseline	0	106	9	73	0	0	0	1	1	1	0	Fatigue
310	Baseline	0	13	7	36	0	0	0	1	1	1	0	Inefficient
311	Baseline	0	100	8	60	0	0	0	1	1	1	0
312	Baseline	0	48	9	45	0	0	0	1	1	1	0
313	Baseline	0	117	7	70	0	0	0	1	1	1	1
314	Baseline	0	101	10	57	0	0	0	1	1	1	1	Insomnia
315	Baseline	0	85	9	44	0	0	0	1	1	1	0
316	Baseline	0	38	7	54	0	0	0	1	1	1	1	Inefficient
317	Baseline	0	44	8	38	0	0	0	1	1	1	0	Inefficient
318	Baseline	0	47	8	63	0	0	0	1	1	1	0	Inefficient
319	Baseline	0	56	9	71	0	0	0	1	1	1	1
320	Baseline	0	68	9	48	0	0	0	0	0	1	1
321	Baseline	0	103	8	67	0	0	0	1	1	1	0	Fatigue
322	Baseline	0	38	9	47	0	0	0	0	1	1	0	Inefficient
323	Baseline	0	50	9	46	0	0	0	1	1	1	0
324	Baseline	0	68	5	40	0	0	0	0	0	1	1
325	Baseline	0	91	9	53	0	0	0	1	1	1	0	Insomnia
326	Baseline	0	32	9	73	0	0	0	1	1	1	1	Inefficient
327	Baseline	0	91	10	40	0	0	0	1	1	1	1	Insomnia
328	Baseline	0	51	7	57	0	0	0	1	1	1	0
329	Baseline	0	42	7	58	0	0	0	1	0	1	1	Inefficient
330	Baseline	0	71	10	75	0	0	0	0	0	1	0
331	Baseline	0	118	9	71	0	0	0	1	1	1	0	Insomnia
332	Baseline	0	118	7	36	0	0	0	1	1	1	0	Insomnia
333	Baseline	0	117	10	48	0	0	0	1	1	1	0
334	Baseline	0	107	9	59	0	0	0	1	1	1	0	Fatigue
335	Baseline	0	60	7	80	0	0	0	1	1	1	0
336	Baseline	0	8	9	36	0	0	0	1	1	1	0	Inefficient
337	Baseline	0	19	8	57	0	0	0	0	0	0	0	Fatigue
338	Baseline	0	35	9	56	0	0	0	1	1	1	0	Inefficient
339	Baseline	0	82	9	35	0	0	0	1	1	1	0
340	Baseline	0	22	8	61	0	0	0	1	1	1	0	Dizziness
341	Baseline	0	90	9	44	0	0	0	1	1	1	0	Insomnia
342	Baseline	0	7	9	71	0	0	0	0	1	1	0
343	Baseline	0	28	10	70	0	0	0	1	0	1	1	Fatigue
344	Baseline	0	106	9	68	0	0	0	1	1	1	0	Fatigue
345	Baseline	0	40	10	70	0	0	0	1	1	1	1	Inefficient
346	Baseline	0	19	9	78	0	0	0	0	0	0	0	Fatigue
347	Baseline	0	109	9	38	0	0	0	1	1	1	0
348	Baseline	0	15	8	45	0	0	0	0	0	0	0	Fatigue
349	Baseline	0	94	9	56	0	0	0	1	1	1	0	GastrointestinalNoneSymptoms
350	Baseline	0	57	8	80	0	0	0	1	1	1	0
351	Baseline	0	99	7	80	0	0	0	1	1	1	0
352	Baseline	0	16	7	54	0	0	0	1	0	1	1	Fatigue
353	Baseline	0	69	10	44	0	0	0	0	1	1	1
354	Baseline	0	92	7	40	0	0	0	1	1	1	0	Inefficient
355	Baseline	0	80	7	35	0	0	0	1	0	1	1	Inefficient
356	Baseline	0	11	9	59	0	0	0	1	1	1	0	Fatigue
357	Baseline	0	7	9	48	0	0	0	1	1	1	0
358	Baseline	0	26	9	52	0	0	0	1	1	1	0
359	Baseline	0	99	9	39	0	0	0	1	1	1	0
360	Baseline	0	35	9	49	0	0	0	1	1	1	0	Inefficient
361	Baseline	0	52	9	60	0	0	0	1	1	1	1
362	Baseline	0	64	9	51	0	0	0	1	1	1	0
363	Baseline	0	65	7	41	0	0	0	0	1	1	0	Hypotension
364	Baseline	0	94	10	45	0	0	0	1	1	1	0	GastrointestinalNoneSymptoms
365	Baseline	0	91	10	47	0	0	0	1	1	1	0	Insomnia
366	Baseline	0	26	9	39	0	0	0	0	0	1	0
367	Baseline	0	116	8	39	0	0	0	1	1	1	1
368	Baseline	0	105	9	53	0	0	0	1	1	1	1	Fatigue
369	Baseline	0	8	10	39	0	0	0	1	1	1	0	Inefficient
370	Baseline	0	89	9	58	0	0	0	1	1	1	1	Inefficient
371	Baseline	0	71	7	39	0	0	0	0	0	1	0
372	Baseline	0	86	9	41	0	0	0	1	1	1	1
373	Baseline	0	93	7	38	0	0	0	1	1	1	0	Inefficient
374	Baseline	0	79	10	56	0	0	0	1	0	1	0	Inefficient
375	Baseline	0	117	5	49	0	0	0	1	1	1	0	Insomnia
376	Baseline	0	8	10	53	0	0	0	1	1	1	0	Inefficient
377	Baseline	0	58	5	66	0	0	0	1	1	1	0
378	Baseline	0	89	8	59	0	0	0	1	1	1	0	GastrointestinalNoneSymptoms
379	Baseline	0	69	7	49	0	0	0	0	1	1	1
380	Baseline	0	93	7	47	0	0	0	1	1	1	0	Inefficient
381	Baseline	0	92	9	51	0	0	0	1	1	1	1	Inefficient
382	Baseline	0	15	9	38	0	0	0	0	0	0	0	Fatigue
383	Baseline	0	71	7	44	0	0	0	0	0	1	0
384	Baseline	0	68	10	46	0	0	0	0	0	1	0
385	Baseline	0	111	10	46	0	0	0	1	1	1	0	CognitiveNoneSymptoms
386	Baseline	0	97	7	40	0	0	0	1	1	1	0	Fatigue
387	Baseline	0	88	9	64	0	0	0	1	1	1	0
388	Baseline	0	79	10	39	0	0	0	1	1	1	0	Inefficient
389	Baseline	0	36	9	45	0	0	0	1	1	1	1	Inefficient
390	Baseline	0	36	10	51	0	0	0	0	1	1	1	Inefficient
391	Baseline	0	54	9	40	0	0	0	1	1	1	0	Dizziness
392	Baseline	0	108	8	46	0	0	0	1	1	1	1	Insomnia
393	Baseline	0	24	10	47	0	0	0	1	1	1	0
394	Baseline	0	52	10	51	0	0	0	1	1	1	0
395	Baseline	0	28	8	64	0	0	0	1	1	1	1	Fatigue
396	Baseline	0	91	8	57	0	0	0	1	1	1	0	Insomnia
397	Baseline	0	96	10	43	0	0	0	1	1	1	0	Fatigue
398	Baseline	0	61	9	58	0	0	0	1	1	1	0
399	Baseline	0	58	10	47	0	0	0	1	1	1	1
400	Baseline	0	53	8	43	0	0	0	1	1	1	0
401	Baseline	0	102	10	41	0	0	0	1	1	1	0	Insomnia
402	Baseline	0	7	10	56	0	0	0	1	1	1	0
403	Baseline	0	51	9	61	0	0	0	1	1	1	0
404	Baseline	0	99	8	61	0	0	0	1	1	1	0
405	Baseline	0	9	10	45	0	0	0	1	0	0	0
406	Baseline	0	120	10	44	0	0	0	1	1	1	1	Inefficient
407	Baseline	0	43	8	65	0	0	0	1	1	1	1	Inefficient
408	Baseline	0	45	8	41	0	0	0	1	1	1	0	Inefficient
409	Baseline	0	17	10	48	0	0	0	0	0	0	0	Fatigue
410	Baseline	0	27	8	40	0	0	0	0	1	1	1	Fatigue
411	Baseline	0	19	9	45	0	0	0	0	0	1	0	Fatigue
412	Baseline	0	34	8	43	0	0	0	1	1	1	1	Inefficient
413	Baseline	0	117	8	40	0	0	0	1	1	1	0	Insomnia
414	Baseline	0	13	9	47	0	0	0	1	1	1	0	Inefficient
415	Baseline	0	111	10	41	0	0	0	1	1	1	0
416	Baseline	0	62	9	39	0	0	0	1	1	1	0
417	Baseline	0	73	9	62	0	0	0	0	0	1	0
418	Baseline	0	57	9	62	0	0	0	1	1	1	0
419	Baseline	0	77	10	48	0	0	0	1	0	1	0
420	Baseline	0	57	9	38	0	0	0	1	1	1	0
421	Baseline	0	56	10	61	0	0	0	1	1	1	1
422	Baseline	0	45	9	38	0	0	0	1	1	1	0	Inefficient
423	Baseline	0	47	10	61	0	0	0	1	1	1	0	Inefficient
424	Baseline	0	82	10	52	0	0	0	1	1	1	0
425	Baseline	0	57	9	65	0	0	0	1	1	1	0
426	Baseline	0	71	9	38	0	0	0	1	1	1	0	Dizziness
427	Baseline	0	44	9	51	0	0	0	1	1	1	0	Inefficient
428	Baseline	0	101	8	63	0	0	0	1	1	1	1	Insomnia
429	Baseline	0	61	9	41	0	0	0	1	1	1	0
430	Baseline	0	98	10	60	0	0	0	1	1	1	1
431	Baseline	0	101	8	56	0	0	0	1	1	1	1	Insomnia
432	Baseline	0	69	10	64	0	0	0	1	1	1	1
433	Baseline	0	44	10	51	0	0	0	1	1	1	1	Inefficient
434	Baseline	0	64	8	49	0	0	0	1	1	1	0
435	Baseline	0	50	10	59	0	0	0	1	1	1	0
436	Baseline	0	33	10	46	0	0	0	1	1	1	1	Inefficient
437	Baseline	0	74	9	40	0	0	0	0	1	1	0
438	Baseline	0	106	9	55	0	0	0	1	0	1	0	Fatigue
439	Baseline	0	96	10	59	0	0	0	1	1	1	0	Fatigue
440	Baseline	0	70	10	52	0	0	0	0	0	1	0
441	Baseline	0	53	8	55	0	0	0	1	1	1	0
442	Baseline	0	115	10	41	0	0	0	1	1	1	0	GastrointestinalNoneSymptoms
443	Baseline	0	90	10	48	0	0	0	1	1	1	0	Insomnia
444	Baseline	0	94	9	60	0	0	0	1	1	1	0	GastrointestinalNoneSymptoms
445	Baseline	0	49	10	51	0	0	0	1	1	1	1
446	Baseline	0	57	9	52	0	0	0	1	1	1	0
447	Baseline	0	51	9	53	0	0	0	1	1	1	0
448	Baseline	0	11	10	63	0	0	0	1	1	1	0	Fatigue
449	Baseline	0	118	10	42	0	0	0	1	1	1	0	Insomnia
450	Baseline	0	79	8	64	0	0	0	1	0	1	0	Inefficient
451	Baseline	0	101	9	64	0	0	0	1	1	1	0	Insomnia
452	Baseline	0	40	8	63	0	0	0	0	1	0	0	Inefficient
453	Baseline	0	52	8	66	0	0	0	1	1	1	0
454	Baseline	0	37	10	51	0	0	0	1	1	1	1	Inefficient
455	Baseline	0	10	9	49	0	0	0	1	1	1	0	Fatigue
456	Baseline	0	8	10	40	0	0	0	1	1	1	0	Fatigue
457	Baseline	0	82	8	63	0	0	0	1	1	1	0
458	Baseline	0	28	8	61	0	0	0	1	1	1	1	Fatigue
459	Baseline	0	61	9	55	0	0	0	1	1	1	0
460	Baseline	0	39	10	57	0	0	0	1	1	1	1	Inefficient
461	Baseline	0	94	10	60	0	0	0	1	1	1	0	GastrointestinalNoneSymptoms
462	Baseline	0	106	8	54	0	0	0	1	1	1	0	Fatigue
463	Baseline	0	118	9	53	0	0	0	1	1	1	0	Insomnia
464	Baseline	0	9	9	53	0	0	0	0	0	0	0
465	Baseline	0	114	8	53	0	0	0	1	1	1	0	CognitiveNoneSymptoms
466	Baseline	0	113	8	65	0	0	0	1	1	1	0
467	Baseline	0	26	10	47	0	0	0	1	1	1	1	Fatigue
468	Baseline	0	9	9	47	0	0	0	0	0	0	0	Fatigue
469	Baseline	0	23	9	51	0	0	0	0	0	1	0	Dizziness
470	Baseline	0	101	8	60	0	0	0	1	1	1	0	Insomnia
471	Baseline	0	97	9	56	0	0	0	1	1	1	0	Fatigue
472	Baseline	0	67	9	59	0	0	0	0	0	1	0
473	Baseline	0	52	9	40	0	0	0	1	1	1	0
474	Baseline	0	119	8	65	0	0	0	1	1	1	0	Insomnia
475	Baseline	0	95	9	56	0	0	0	1	1	1	1	GastrointestinalNoneSymptoms
476	Baseline	0	94	8	66	0	0	0	1	1	1	0	GastrointestinalNoneSymptoms
477	Baseline	0	108	8	57	0	0	0	1	1	1	0	Insomnia
478	Baseline	0	27	9	56	0	0	0	1	1	1	1	Fatigue
479	Baseline	0	39	10	60	0	0	0	1	1	1	1	Inefficient
480	Baseline	0	60	8	42	0	0	0	1	1	1	1
481	Baseline	0	117	9	55	0	0	0	1	1	1	1
482	Baseline	0	66	8	66	0	0	0	0	1	1	0	CognitiveNoneSymptoms
483	Baseline	0	78	10	49	0	0	0	1	0	1	0	Inefficient
484	Baseline	0	117	8	38	0	0	0	1	1	1	0	Insomnia
485	Baseline	0	53	8	51	0	0	0	1	1	1	0
486	Baseline	0	17	9	65	0	0	0	1	1	1	1	Fatigue
487	Baseline	0	83	9	49	0	0	0	1	1	1	0
488	Baseline	0	18	8	39	0	0	0	1	0	1	1	Fatigue
489	Baseline	0	100	10	43	0	0	0	1	1	1	0
490	Baseline	0	114	10	62	0	0	0	1	1	1	0
491	Baseline	0	26	9	44	0	0	0	1	0	1	0	Fatigue
492	Baseline	0	112	9	50	0	0	0	1	1	1	0
493	Baseline	0	56	9	45	0	0	0	1	1	1	0
494	Baseline	0	74	9	61	0	0	0	0	0	1	0
495	Baseline	0	32	10	38	0	0	0	1	1	1	1	Inefficient
496	Baseline	0	92	9	58	0	0	0	1	1	1	0	Inefficient
497	Baseline	0	13	10	64	0	0	0	1	1	1	0	Inefficient
498	Baseline	0	18	9	48	0	0	0	1	1	0	1	Fatigue
499	Baseline	0	61	9	50	0	0	0	1	1	1	0
500	Baseline	0	64	10	39	0	0	0	0	1	1	0	Hypotension
501	Baseline	0	94	10	52	0	0	0	1	1	1	0	GastrointestinalNoneSymptoms
502	Baseline	0	41	8	57	0	0	0	0	1	0	1	Inefficient
503	Baseline	0	37	8	40	0	0	0	1	1	1	1	Inefficient
504	Baseline	0	117	10	44	0	0	0	1	1	1	0	Insomnia
505	Baseline	0	43	10	53	0	0	0	1	1	0	1	Inefficient
506	Baseline	0	37	10	54	0	0	0	1	1	1	1	Inefficient
507	Baseline	0	94	9	47	0	0	0	1	1	1	0	GastrointestinalNoneSymptoms
508	Baseline	0	101	10	46	0	0	0	1	0	1	0	Insomnia
509	Baseline	0	17	9	53	0	0	0	1	0	1	0	Fatigue
510	Baseline	0	110	8	47	0	0	0	1	1	1	1	CognitiveNoneSymptoms
511	Baseline	0	21	8	66	0	0	0	1	1	1	1	Dizziness
512	Baseline	0	70	9	54	0	0	0	0	0	1	0
513	Baseline	0	94	10	53	0	0	0	1	0	1	0	GastrointestinalNoneSymptoms
514	Baseline	0	10	8	46	0	0	0	1	1	1	0	Fatigue
515	Baseline	0	58	10	38	0	0	0	1	1	1	0
516	Baseline	0	108	10	54	0	0	0	1	0	1	0	Insomnia
517	Baseline	0	26	9	63	0	0	0	1	1	1	0	Fatigue
518	Baseline	0	31	10	45	0	0	0	1	1	1	1	Inefficient
519	Baseline	0	61	9	65	0	0	0	1	0	1	0
520	Baseline	0	83	9	54	0	0	0	1	1	1	0
521	Baseline	0	95	8	64	0	0	0	1	1	1	0	GastrointestinalNoneSymptoms
522	Baseline	0	67	9	48	0	0	0	1	0	1	0
523	Baseline	0	31	8	44	0	0	0	1	1	1	1	Inefficient
524	Baseline	0	8	10	48	0	0	0	1	1	1	0	Inefficient
525	Baseline	0	18	10	58	0	0	0	0	0	1	1	Fatigue
526	Baseline	0	19	10	65	0	0	0	1	0	0	0	Fatigue
527	Baseline	0	54	9	57	0	0	0	1	1	1	0
528	Baseline	0	61	9	65	0	0	0	1	1	1	0
529	Baseline	0	28	8	49	0	0	0	1	1	1	1
530	Baseline	0	74	10	63	0	0	0	0	0	1	0
531	Baseline	0	65	9	53	0	0	0	0	1	1	0	Hypotension
532	Baseline	0	18	9	48	0	0	0	1	1	1	0	Fatigue
533	Baseline	0	67	10	44	0	0	0	0	1	1	0
534	Baseline	0	17	9	48	0	0	0	1	1	1	0	Fatigue
535	Baseline	0	35	8	52	0	0	0	1	1	1	0	Inefficient
536	Baseline	0	70	8	57	0	0	0	0	0	1	0
537	Baseline	0	100	8	39	0	0	0	1	1	1	0
538	Baseline	0	53	8	59	0	0	0	1	1	1	0
539	Baseline	0	114	10	61	0	0	0	1	1	1	0	Fatigue
540	Baseline	0	53	10	57	0	0	0	1	1	1	0
541	Baseline	0	36	8	53	0	0	0	1	1	1	1	Inefficient
542	Baseline	0	11	10	53	0	0	0	1	1	1	0	Inefficient
543	Baseline	0	11	10	53	0	0	0	1	1	1	0	Inefficient
544	Baseline	0	79	10	48	0	0	0	1	0	1	0	Inefficient
545	Baseline	0	96	10	51	0	0	0	0	1	1	0	Inefficient
546	Baseline	0	54	8	58	0	0	0	1	1	1	0
547	Baseline	0	10	10	50	0	0	0	1	1	1	0	Fatigue
548	Baseline	0	97	10	45	0	0	0	1	1	1	0	Fatigue
549	Baseline	0	37	10	66	0	0	0	1	1	1	1	Inefficient
550	Baseline	0	26	10	47	0	0	0	0	1	0	1
551	Baseline	0	42	8	45	0	0	0	1	1	1	1	Inefficient
552	Baseline	0	106	10	42	0	0	0	0	1	1	1	Fatigue
553	Baseline	0	19	9	58	0	0	0	0	0	0	0	Fatigue
554	Baseline	0	119	10	60	0	0	0	1	1	1	0	Inefficient
555	Baseline	0	24	10	60	0	0	0	1	1	1	0
556	Baseline	0	10	8	61	0	0	0	1	1	1	0	Fatigue
557	Baseline	0	58	8	65	0	0	0	1	1	1	0
558	Baseline	0	81	8	63	0	0	0	1	0	1	0
559	Baseline	0	49	8	42	0	0	0	0	1	1	1
560	Baseline	0	70	9	39	0	0	0	0	0	1	0
561	Baseline	0	64	9	40	0	0	0	0	1	1	0	Hypotension
562	Baseline	0	66	10	40	0	0	0	1	1	1	1
563	Baseline	0	63	10	53	0	0	0	0	0	1	0
564	Baseline	0	105	10	38	0	0	0	1	1	1	0	Fatigue
565	Baseline	0	65	9	50	0	0	0	0	1	1	0	Hypotension
566	Baseline	0	96	9	63	0	0	0	1	1	1	0	Fatigue
567	Baseline	0	8	10	63	0	0	0	1	1	1	0	Inefficient
568	Baseline	0	46	8	62	0	0	0	1	1	1	0	Inefficient
569	Baseline	0	117	8	57	0	0	0	1	1	1	0	Insomnia
570	Baseline	0	97	8	63	0	0	0	1	1	1	0	Fatigue
571	Baseline	0	23	9	64	0	0	0	1	1	1	1	Dizziness
572	Baseline	0	29	9	65	0	0	0	0	1	0	1
573	Baseline	0	88	8	49	0	0	0	1	1	1	0
574	Baseline	0	12	9	65	0	0	0	1	1	1	0	Inefficient
575	Baseline	0	88	9	64	0	0	0	1	1	1	0
576	Baseline	0	91	8	51	0	0	0	1	1	1	0	Insomnia
577	Baseline	0	38	9	56	0	0	0	1	0	0	1	Inefficient
578	Baseline	0	19	8	44	0	0	0	0	1	0	0	Fatigue
579	Baseline	0	75	8	40	0	0	0	0	0	1	0
580	Baseline	0	95	8	58	0	0	0	1	1	1	0	GastrointestinalNoneSymptoms
581	Baseline	0	115	8	44	0	0	0	1	1	1	1	Fatigue
582	Baseline	0	115	9	64	0	0	0	1	1	1	0
583	Baseline	0	93	8	39	0	0	0	1	1	1	0	Dizziness
584	Baseline	0	58	9	38	0	0	0	1	1	1	0
585	Baseline	0	74	8	52	0	0	0	0	0	1	0
586	Baseline	0	79	9	55	0	0	0	1	0	1	0	Inefficient
587	Baseline	0	39	9	49	0	0	0	1	1	1	1	Inefficient
588	Baseline	0	94	9	63	0	0	0	1	1	1	0	GastrointestinalNoneSymptoms
589	Baseline	0	63	9	40	0	0	0	0	1	1	0
590	Baseline	0	27	10	51	0	0	0	0	1	0	0	Fatigue
591	Baseline	0	14	8	43	0	0	0	0	0	0	0	Inefficient
592	Baseline	0	104	9	48	0	0	0	1	1	1	0	Fatigue
593	Baseline	0	49	8	55	0	0	0	1	1	1	1
594	Baseline	0	87	8	54	0	0	0	1	1	1	1
595	Baseline	0	113	9	50	0	0	0	1	1	1	1
596	Baseline	0	49	9	46	0	0	0	1	1	1	1
597	Baseline	0	102	10	61	0	0	0	1	1	1	0	Insomnia
598	Baseline	0	70	10	50	0	0	0	1	0	1	0
599	Baseline	0	47	9	65	0	0	0	1	1	1	0	Inefficient
600	Baseline	0	94	10	42	0	0	0	1	1	1	0	GastrointestinalNoneSymptoms
601	Baseline	0	98	9	49	0	0	0	0	1	1	1
602	Baseline	0	13	10	62	0	0	0	1	1	1	0	Inefficient
603	Baseline	0	61	9	50	0	0	0	1	1	1	0
604	Baseline	0	19	10	40	0	0	0	0	0	0	0	Fatigue
605	Baseline	0	54	10	61	0	0	0	1	1	1	0
606	Baseline	0	27	9	51	0	0	0	1	0	1	1	Fatigue
607	Baseline	0	26	8	53	0	0	0	1	0	1	1
608	Baseline	0	98	9	54	0	0	0	1	1	1	1
609	Baseline	0	82	10	49	0	0	0	1	1	1	0
610	Baseline	0	74	8	57	0	0	0	0	0	1	0
611	Baseline	0	110	9	60	0	0	0	1	1	1	1	Palpitation
612	Baseline	0	38	10	57	0	0	0	1	1	1	0	Inefficient
613	Baseline	0	85	9	64	0	0	0	0	1	1	0
614	Baseline	0	49	10	43	0	0	0	1	1	1	1
615	Baseline	0	88	9	41	0	0	0	1	1	1	0
616	Baseline	0	70	10	43	0	0	0	0	0	1	0
617	Baseline	0	49	10	58	0	0	0	1	0	1	1
618	Baseline	0	104	10	46	0	0	0	1	1	1	1	Fatigue
619	Baseline	0	16	8	51	0	0	0	1	1	1	1	Fatigue
620	Baseline	0	55	8	40	0	0	0	1	1	1	1
621	Baseline	0	99	10	62	0	0	0	1	1	1	1	Dizziness
622	Baseline	0	38	8	58	0	0	0	0	0	1	0	Inefficient
623	Baseline	0	15	8	53	0	0	0	0	0	0	0	Fatigue
624	Baseline	0	16	8	64	0	0	0	0	1	1	1	Fatigue
625	Baseline	0	111	9	40	0	0	0	1	1	1	0	CognitiveNoneSymptoms
626	Baseline	0	32	8	65	0	0	0	1	1	1	1	Inefficient
627	Baseline	0	75	10	42	0	0	0	0	0	1	0
628	Baseline	0	76	8	60	0	0	0	1	0	1	0
629	Baseline	0	111	8	43	0	0	0	1	1	1	1	CognitiveNoneSymptoms
630	Baseline	0	30	9	47	0	0	0	1	1	0	0
631	Baseline	0	82	10	50	0	0	0	1	1	1	0
632	Baseline	0	113	9	60	0	0	0	1	1	1	0
633	Baseline	0	74	10	39	0	0	0	0	0	1	0
634	Baseline	0	44	9	56	0	0	0	1	1	1	0	Inefficient
635	Baseline	0	7	9	41	0	0	0	1	0	1	0
636	Baseline	0	85	9	52	0	0	0	1	1	1	0
637	Baseline	0	48	8	64	0	0	0	1	1	1	0
638	Baseline	0	87	8	45	0	0	0	1	1	1	1
639	Baseline	0	43	9	62	0	0	0	1	1	1	1	Inefficient
640	Baseline	0	26	8	48	0	0	0	0	1	1	1	Fatigue
641	Baseline	0	103	10	42	0	0	0	1	1	1	0	Fatigue
642	Baseline	0	71	9	54	0	0	0	0	0	1	0
643	Baseline	0	81	10	56	0	0	0	1	0	1	0
644	Baseline	0	75	9	53	0	0	0	0	0	1	1
645	Baseline	0	72	8	43	0	0	0	0	0	1	0
646	Baseline	0	84	10	42	0	0	0	1	1	1	0
647	Baseline	0	92	10	65	0	0	0	1	1	1	0	Inefficient
648	Baseline	0	82	8	40	0	0	0	1	1	1	0
649	Baseline	0	47	8	43	0	0	0	1	1	1	0	CognitiveNoneSymptoms
650	Baseline	0	29	10	60	0	0	0	1	0	1	1
651	Baseline	0	13	8	52	0	0	0	1	1	1	0	Inefficient
652	Baseline	0	109	9	66	0	0	0	1	1	1	0
653	Baseline	0	46	8	43	0	0	0	1	1	1	0	Inefficient
654	Baseline	0	110	8	44	0	0	0	1	1	1	1	CognitiveNoneSymptoms
655	Baseline	0	93	10	44	0	0	0	1	1	1	0	Inefficient
656	Baseline	0	15	8	39	0	0	0	0	0	0	0	Fatigue
657	Baseline	0	67	9	57	0	0	0	0	1	1	0
658	Baseline	0	83	10	43	0	0	0	1	1	1	0
659	Baseline	0	84	9	55	0	0	0	1	1	1	0
660	Baseline	0	75	9	50	0	0	0	0	0	1	0
661	Baseline	0	65	9	66	0	0	0	0	1	1	0	Hypotension
662	Baseline	0	53	9	48	0	0	0	1	1	1	0
663	Baseline	0	21	8	52	0	0	0	1	1	1	1	DryNoneMouth
664	Baseline	0	23	9	56	0	0	0	1	0	1	0	Dizziness
665	Baseline	0	111	9	40	0	0	0	1	1	1	1	Palpitation
666	Baseline	0	37	10	56	0	0	0	1	1	1	1	Inefficient
667	Baseline	0	29	10	57	0	0	0	1	1	1	0
668	Baseline	0	119	8	62	0	0	0	1	1	1	0	Insomnia
669	Baseline	0	9	9	62	0	0	0	0	0	0	0	Fatigue
670	Baseline	0	94	8	48	0	0	0	1	1	1	0	GastrointestinalNoneSymptoms
671	Baseline	0	56	10	41	0	0	0	1	1	1	0
672	Baseline	0	68	9	38	0	0	0	0	0	1	0
673	Baseline	0	106	8	48	0	0	0	1	1	1	1	Fatigue
674	Baseline	0	107	10	42	0	0	0	1	1	1	0	Fatigue
675	Baseline	0	86	10	55	0	0	0	1	1	1	1
676	Baseline	0	72	10	65	0	0	0	0	0	1	0
677	Baseline	0	32	9	63	0	0	0	1	1	1	1	Inefficient
678	Baseline	0	106	8	63	0	0	0	1	1	1	1	Fatigue
679	Baseline	0	65	8	53	0	0	0	1	1	1	0	Hypotension
680	Baseline	0	82	8	40	0	0	0	1	1	1	0
681	Baseline	0	119	9	39	0	0	0	1	1	1	0	Insomnia
682	Baseline	0	81	10	64	0	0	0	1	0	1	0
683	Baseline	0	59	10	65	0	0	0	1	1	1	1
684	Baseline	0	47	9	60	0	0	0	1	1	1	0	Inefficient
685	Baseline	0	112	9	50	0	0	0	1	1	1	1
686	Baseline	0	85	8	49	0	0	0	1	1	1	0
687	Baseline	0	18	10	59	0	0	0	1	1	1	1	Fatigue
688	Baseline	0	79	9	49	0	0	0	1	0	1	0	Inefficient
689	Baseline	0	104	9	45	0	0	0	1	1	1	0	Fatigue
690	Baseline	0	80	9	47	0	0	0	1	0	1	0	Inefficient
691	Baseline	0	102	10	58	0	0	0	1	1	1	0	Insomnia
692	Baseline	0	98	10	40	0	0	0	1	1	1	1
693	Baseline	0	87	9	57	0	0	0	1	1	1	1	GastrointestinalNoneSymptoms
694	Baseline	0	26	8	64	0	0	0	1	0	0	1	Fatigue
695	Baseline	0	119	8	44	0	0	0	1	1	1	0	Insomnia
696	Baseline	0	79	10	60	0	0	0	1	1	1	0	Inefficient
697	Baseline	0	18	8	57	0	0	0	1	1	1	1	Fatigue
698	Baseline	0	31	8	42	0	0	0	1	1	1	1	Inefficient
699	Baseline	0	92	8	39	0	0	0	1	1	1	0	Inefficient
700	Baseline	0	92	9	59	0	0	0	1	1	1	0	Inefficient
701	Baseline	0	72	8	62	0	0	0	0	1	1	0
702	Baseline	0	24	9	61	0	0	0	1	1	1	0	Dizziness
703	Baseline	0	64	10	43	0	0	0	0	1	1	1
704	Baseline	0	63	8	62	0	0	0	0	1	1	1
705	Baseline	0	21	10	64	0	0	0	1	1	0	1	DryNoneMouth
706	Baseline	0	37	8	62	0	0	0	1	1	1	1	Inefficient
707	Baseline	0	60	8	63	0	0	0	1	1	1	0
708	Baseline	0	63	8	59	0	0	0	0	1	1	0
709	Baseline	0	94	10	50	0	0	0	1	1	1	0	Dizziness
710	Baseline	0	70	10	50	0	0	0	0	1	1	0
711	Baseline	0	30	10	65	0	0	0	1	0	1	1
712	Baseline	0	9	8	55	0	0	0	0	0	0	0	Fatigue
713	Baseline	0	117	8	42	0	0	0	1	1	1	1	Insomnia
714	Baseline	0	49	9	38	0	0	0	1	1	1	1
715	Baseline	0	44	8	53	0	0	0	1	1	1	0	Inefficient
716	Baseline	0	37	8	59	0	0	0	1	1	1	1	Inefficient
717	Baseline	0	35	8	54	0	0	0	1	1	1	0	Inefficient
718	Baseline	0	21	9	55	0	0	0	1	0	1	1	DryNoneMouth
719	Baseline	0	59	8	62	0	0	0	1	1	1	0
720	Baseline	0	36	8	52	0	0	0	1	1	1	1	Inefficient
721	Baseline	0	67	9	44	0	0	0	0	1	1	0	Fatigue
722	Baseline	0	74	10	55	0	0	0	0	0	1	0
723	Baseline	0	47	9	51	0	0	0	1	1	1	0	Inefficient
724	Baseline	0	102	9	58	0	0	0	1	1	1	0	Insomnia
725	Baseline	0	78	9	53	0	0	0	1	0	1	0	Inefficient
726	Baseline	0	94	8	54	0	0	0	1	1	1	0	GastrointestinalNoneSymptoms
727	Baseline	0	76	9	45	0	0	0	1	1	1	0
728	Baseline	0	102	8	62	0	0	0	1	1	1	1	Insomnia
729	Baseline	0	91	10	55	0	0	0	1	1	1	0	Insomnia
730	Baseline	0	17	8	55	0	0	0	0	1	0	1	Fatigue
731	Baseline	0	34	9	44	0	0	0	1	1	1	1	Inefficient
732	Baseline	0	54	10	49	0	0	0	1	1	1	0
733	Baseline	0	53	9	58	0	0	0	1	1	1	0
734	Baseline	0	44	9	46	0	0	0	1	1	1	0	Inefficient
735	Baseline	0	70	9	43	0	0	0	0	1	1	1
736	Baseline	0	41	8	43	0	0	0	1	1	1	1	Inefficient
737	Baseline	0	13	8	61	0	0	0	1	0	1	0	Inefficient
738	Baseline	0	28	10	44	0	0	0	1	1	1	1	Fatigue
739	Baseline	0	52	10	46	0	0	0	1	1	1	0
740	Baseline	0	71	10	40	0	0	0	0	0	1	0
741	Baseline	0	67	10	42	0	0	0	1	1	1	0
742	Baseline	0	89	9	53	0	0	0	1	1	1	0	Inefficient
743	Baseline	0	102	10	53	0	0	0	1	1	1	1	Insomnia
744	Baseline	0	96	10	61	0	0	0	1	1	1	0	Fatigue
745	Baseline	0	102	8	39	0	0	0	1	1	1	1	Insomnia
746	Baseline	0	9	9	48	0	0	0	0	0	0	0
747	Baseline	0	110	9	65	0	0	0	1	1	1	0
748	Baseline	0	32	8	44	0	0	0	1	1	1	1	Inefficient
749	Baseline	0	86	10	66	0	0	0	1	1	1	0
750	Baseline	0	116	9	63	0	0	0	1	1	1	0
751	Baseline	0	43	8	56	0	0	0	1	1	0	1	Inefficient
752	Baseline	0	88	9	63	0	0	0	1	1	1	0	Fatigue
753	Baseline	0	17	10	44	0	0	0	1	0	1	1	Fatigue
754	Baseline	0	44	9	62	0	0	0	1	1	1	0	Inefficient
755	Baseline	0	35	8	45	0	0	0	1	1	1	0	Inefficient
756	Baseline	0	14	10	58	0	0	0	0	0	0	0	Inefficient
757	Baseline	0	56	9	52	0	0	0	1	1	1	1
758	Baseline	0	84	10	57	0	0	0	1	1	1	0
759	Baseline	0	107	9	66	0	0	0	1	1	1	1	Fatigue
760	Baseline	0	95	8	41	0	0	0	1	1	1	0	GastrointestinalNoneSymptoms
761	Baseline	0	80	10	40	0	0	0	1	0	1	0
762	Baseline	0	20	8	56	0	0	0	0	0	0	0	Dizziness
763	Baseline	0	22	10	53	0	0	0	1	1	1	0	Dizziness
764	Baseline	0	78	8	60	0	0	0	0	0	1	0	Inefficient
765	Baseline	0	11	10	65	0	0	0	1	1	1	0	Inefficient
766	Baseline	0	57	10	54	0	0	0	1	1	1	1
767	Baseline	0	18	9	56	0	0	0	1	1	1	1	Fatigue
768	Baseline	0	91	10	55	0	0	0	1	1	1	0	Insomnia
769	Baseline	0	22	9	42	0	0	0	1	1	1	0	Dizziness
770	Baseline	0	113	9	62	0	0	0	1	1	1	0
771	Baseline	0	35	8	58	0	0	0	1	1	1	1	Inefficient
772	Baseline	0	43	10	45	0	0	0	1	0	1	0	Inefficient
773	Baseline	0	58	10	38	0	0	0	1	1	1	1
774	Baseline	0	48	8	39	0	0	0	1	1	1	0
775	Baseline	0	90	8	46	0	0	0	1	1	1	0	Insomnia
776	Baseline	0	103	10	61	0	0	0	1	1	1	1	Fatigue
777	Baseline	0	15	8	58	0	0	0	0	0	0	0	Fatigue
778	Baseline	0	114	8	50	0	0	0	1	1	1	1	CognitiveNoneSymptoms
779	Baseline	0	27	8	47	0	0	0	1	1	1	1	Fatigue
780	Baseline	0	73	10	48	0	0	0	0	0	1	0
781	Baseline	0	46	9	57	0	0	0	1	1	1	0	Inefficient
782	Baseline	0	58	8	51	0	0	0	1	1	1	0
783	Baseline	0	54	9	55	0	0	0	1	1	1	0
784	Baseline	0	101	9	43	0	0	0	1	1	1	1	Insomnia
785	Baseline	0	15	8	45	0	0	0	0	0	0	0	Fatigue
786	Baseline	0	68	8	60	0	0	0	0	0	1	0
787	Baseline	0	13	9	42	0	0	0	1	1	1	0	Inefficient
788	Baseline	0	104	8	38	0	0	0	1	1	1	0	Fatigue
789	Baseline	0	33	9	50	0	0	0	0	1	1	1	Inefficient
790	Baseline	0	10	10	51	0	0	0	1	1	1	0	Fatigue
791	Baseline	0	103	9	66	0	0	0	1	1	1	0	Insomnia
792	Baseline	0	107	8	39	0	0	0	1	1	1	0	Fatigue
793	Baseline	0	56	9	54	0	0	0	1	1	1	1
794	Baseline	0	112	8	58	0	0	0	0	0	1	0
795	Baseline	0	30	10	46	0	0	0	1	1	0	1
796	Baseline	0	99	10	62	0	0	0	1	1	1	1
797	Baseline	0	85	8	45	0	0	0	1	1	1	0	Fatigue
798	Baseline	0	115	9	51	0	0	0	1	1	1	0
799	Baseline	0	85	9	50	0	0	0	1	1	1	0
800	Baseline	0	50	8	65	0	0	0	1	1	1	0
801	Baseline	0	91	9	54	0	0	0	1	1	0	0	Insomnia
802	Baseline	0	25	8	49	0	0	0	0	0	0	0
803	Baseline	0	73	8	40	0	0	0	1	0	1	1
804	Baseline	0	73	10	55	0	0	0	0	0	1	0
805	Baseline	0	8	9	57	0	0	0	1	1	1	0	CognitiveNoneSymptoms
806	Baseline	0	108	8	64	0	0	0	1	1	1	0	Insomnia
807	Baseline	0	42	9	59	0	0	0	1	1	0	0	Inefficient
808	Baseline	0	91	9	62	0	0	0	1	1	1	0	Insomnia
809	Baseline	0	83	8	49	0	0	0	1	1	1	0
810	Baseline	0	72	10	66	0	0	0	0	0	1	0
811	Baseline	0	8	9	41	0	0	0	1	1	1	0	Inefficient
812	Baseline	0	11	8	52	0	0	0	1	1	1	0	Inefficient
813	Baseline	0	53	10	52	0	0	0	1	1	1	0
814	Baseline	0	58	9	43	0	0	0	1	1	1	0
815	Baseline	0	24	8	57	0	0	0	1	1	0	0
816	Baseline	0	7	9	62	0	0	0	1	1	1	0	Fatigue
817	Baseline	0	63	10	63	0	0	0	1	1	1	0
818	Baseline	0	114	8	64	0	0	0	0	0	0	0
819	Baseline	0	55	8	54	0	0	0	1	1	1	1
820	Baseline	0	32	10	61	0	0	0	0	1	1	1	Inefficient
821	Baseline	0	112	8	38	0	0	0	1	0	0	0
822	Baseline	0	53	10	41	0	0	0	1	1	1	0
823	Baseline	0	81	8	66	0	0	0	1	0	1	0
824	Baseline	0	68	9	60	0	0	0	0	0	1	0
825	Baseline	0	41	8	63	0	0	0	1	1	0	0	Inefficient
826	Baseline	0	20	9	64	0	0	0	0	0	0	1	Fatigue
827	Baseline	0	23	10	40	0	0	0	1	1	1	0	Dizziness
828	Baseline	0	41	8	47	0	0	0	1	1	1	0	Inefficient
829	Baseline	0	32	9	53	0	0	0	1	1	1	1	Inefficient
830	Baseline	0	62	10	53	0	0	0	1	1	1	1
831	Baseline	0	49	9	43	0	0	0	1	1	1	0
832	Baseline	0	83	8	41	0	0	0	1	1	1	0
833	Baseline	0	105	8	64	0	0	0	1	1	1	0	Fatigue
834	Baseline	0	104	9	66	0	0	0	1	1	1	0	Fatigue
835	Baseline	0	18	10	62	0	0	0	1	1	0	1	Fatigue
836	Baseline	0	73	9	52	0	0	0	0	0	1	0
837	Baseline	0	69	10	52	0	0	0	0	0	1	1
838	Baseline	0	119	9	62	0	0	0	1	1	1	0	Insomnia
839	Baseline	0	44	10	65	0	0	0	1	1	1	0	Inefficient
840	Baseline	0	10	9	59	0	0	0	1	0	1	0	Fatigue
841	Baseline	0	117	8	53	0	0	0	0	0	1	0	Insomnia
842	Baseline	0	46	8	56	0	0	0	1	1	1	0	Inefficient
843	Baseline	0	38	10	52	0	0	0	1	1	1	0	Inefficient
844	Baseline	0	72	9	44	0	0	0	0	0	1	0
845	Baseline	0	49	10	48	0	0	0	1	1	1	0
846	Baseline	0	114	10	44	0	0	0	1	1	1	0
847	Baseline	0	28	8	63	0	0	0	0	1	1	1
848	Baseline	0	13	8	54	0	0	0	1	1	1	0	Inefficient
849	Baseline	0	63	8	39	0	0	0	1	1	1	0
850	Baseline	0	27	8	45	0	0	0	1	1	0	0	Fatigue
851	Baseline	0	94	8	55	0	0	0	1	1	1	0	GastrointestinalNoneSymptoms
852	Baseline	0	17	8	66	0	0	0	0	1	1	1	Fatigue
853	Baseline	0	8	10	38	0	0	0	1	1	1	1	CognitiveNoneSymptoms
854	Baseline	0	106	10	48	0	0	0	1	1	1	1	Fatigue
855	Baseline	0	13	10	49	0	0	0	1	1	1	0	Inefficient
856	Baseline	0	63	9	64	0	0	0	1	1	1	0
857	Baseline	0	113	9	43	0	0	0	1	1	1	0
858	Baseline	0	119	9	42	0	0	0	1	1	1	0	Insomnia
859	Baseline	0	38	8	55	0	0	0	1	0	1	0	Inefficient
860	Baseline	0	44	10	57	0	0	0	1	1	1	0	Inefficient
861	Baseline	0	16	8	50	0	0	0	1	1	1	1	Fatigue
862	Baseline	0	74	9	65	0	0	0	0	0	1	0
863	Baseline	0	111	9	56	0	0	0	1	1	1	1	CognitiveNoneSymptoms
864	Baseline	0	30	9	46	0	0	0	0	0	1	1
865	Baseline	0	13	10	45	0	0	0	1	1	1	0	Inefficient
866	Baseline	0	16	8	51	0	0	0	0	1	1	1	Fatigue
867	Baseline	0	94	10	61	0	0	0	1	1	1	0	GastrointestinalNoneSymptoms
868	Baseline	0	103	9	50	0	0	0	1	1	1	0	Fatigue
869	Baseline	0	53	10	43	0	0	0	1	1	1	0
870	Baseline	0	36	10	45	0	0	0	0	1	1	0	Inefficient
871	Baseline	0	14	8	38	0	0	0	0	0	0	0
872	Baseline	0	82	8	60	0	0	0	1	0	1	0
873	Baseline	0	81	8	41	0	0	0	1	0	1	1
874	Baseline	0	64	8	50	0	0	0	0	1	1	0	Hypotension
875	Baseline	0	116	10	65	0	0	0	1	1	1	0	GastrointestinalNoneSymptoms
876	Baseline	0	29	8	48	0	0	0	1	1	1	1
877	Baseline	0	110	9	62	0	0	0	1	1	1	0
878	Baseline	0	51	10	38	0	0	0	1	1	0	0
879	Baseline	0	60	9	60	0	0	0	1	1	1	0
880	Baseline	0	22	9	42	0	0	0	1	1	1	0	Dizziness
881	Baseline	0	37	9	66	0	0	0	1	1	1	1	Inefficient
882	Baseline	0	82	9	56	0	0	0	1	0	1	0
883	Baseline	0	24	9	43	0	0	0	0	1	0	1	Dizziness
884	Baseline	0	114	10	57	0	0	0	1	1	1	0
885	Baseline	0	97	10	52	0	0	0	1	1	1	0	Fatigue
886	Baseline	0	69	8	65	0	0	0	0	0	1	1
887	Baseline	0	64	8	45	0	0	0	0	1	1	0
888	Baseline	0	70	10	44	0	0	0	0	1	1	1
889	Baseline	0	68	10	41	0	0	0	0	0	1	0
890	Baseline	0	107	10	55	0	0	0	1	1	1	0	Fatigue
891	Baseline	0	40	10	50	0	0	0	1	0	1	1	Inefficient
892	Baseline	0	78	8	58	0	0	0	1	0	1	0	Inefficient
893	Baseline	0	25	10	61	0	0	0	0	0	0	0
894	Baseline	0	28	8	54	0	0	0	1	1	1	1	Fatigue
895	Baseline	0	66	10	39	0	0	0	0	1	1	0
896	Baseline	0	22	9	43	0	0	0	1	1	0	0	Dizziness
897	Baseline	0	65	10	62	0	0	0	1	1	1	0	Hypotension
898	Baseline	0	54	9	52	0	0	0	1	1	1	0
899	Baseline	0	82	8	62	0	0	0	1	0	1	0
900	Baseline	0	97	10	40	0	0	0	1	1	1	0	Fatigue
901	Baseline	0	23	10	47	0	0	0	0	1	0	1	Dizziness
902	Baseline	0	21	9	65	0	0	0	1	1	1	1	Dizziness
903	Baseline	0	67	9	59	0	0	0	0	1	1	0
904	Baseline	0	8	8	53	0	0	0	1	1	1	0	CognitiveNoneSymptoms
905	Baseline	0	96	10	49	0	0	0	1	1	1	0	Fatigue
906	Baseline	0	58	9	65	0	0	0	1	1	1	0
907	Baseline	0	22	9	50	0	0	0	0	1	0	1	Dizziness
908	Baseline	0	20	10	65	0	0	0	0	0	0	0	Dizziness
909	Baseline	0	90	10	65	0	0	0	1	1	1	1	Insomnia
910	Baseline	0	101	10	61	0	0	0	1	1	1	0	Insomnia
911	Baseline	0	73	9	57	0	0	0	0	0	1	0
912	Baseline	0	92	10	50	0	0	0	1	1	1	0	Inefficient
913	Baseline	0	48	8	62	0	0	0	1	1	1	0	CognitiveNoneSymptoms
914	Baseline	0	72	9	44	0	0	0	0	0	1	0
915	Baseline	0	111	10	65	0	0	0	1	1	1	1	CognitiveNoneSymptoms
916	Baseline	0	97	10	49	0	0	0	1	1	1	0	Fatigue
917	Baseline	0	51	10	61	0	0	0	1	1	1	0
918	Baseline	0	65	8	58	0	0	0	1	1	1	0	Hypotension
919	Baseline	0	79	8	39	0	0	0	1	0	1	0	Inefficient
920	Baseline	0	74	10	66	0	0	0	0	1	1	0
921	Baseline	0	91	10	66	0	0	0	1	0	1	0	Insomnia
922	Baseline	0	60	9	65	0	0	0	1	1	1	0
923	Baseline	0	70	8	40	0	0	0	0	1	0	1
924	Baseline	0	13	8	42	0	0	0	1	1	1	0	Inefficient
925	Baseline	0	72	8	42	0	0	0	0	1	1	0
926	Baseline	0	65	9	63	0	0	0	1	0	1	0	Hypotension
927	Baseline	0	66	8	59	0	0	0	0	1	1	0	Hypotension
928	Baseline	0	41	10	65	0	0	0	1	0	1	0	Inefficient
929	Baseline	0	14	8	39	0	0	0	0	0	0	0
930	Baseline	0	14	9	53	0	0	0	0	0	0	0
931	Baseline	0	14	8	35	0	0	0	0	0	0	0
932	Baseline	0	14	8	45	0	0	0	0	0	0	1
933	Baseline	0	14	8	52	0	0	0	0	0	0	0
934	Baseline	0	20	8	34	0	0	0	1	1	1	1
935	Baseline	0	14	8	43	0	0	0	0	0	0	0
936	Baseline	0	14	8	41	0	0	0	0	0	0	0	Insomnia
937	Baseline	0	20	6	38	0	0	0	1	0	1	0
938	Baseline	0	14	8	35	0	0	0	0	0	0	1
939	Baseline	0	14	8	51	0	0	0	0	0	1	0	Insomnia
940	Baseline	0	14	8	35	0	0	0	1	0	0	0
941	Baseline	0	20	8	35	0	0	0	1	1	1	0
942	Baseline	0	14	8	44	0	0	0	0	0	0	0
943	Baseline	0	14	8	39	0	0	0	1	0	1	0	Insomnia
944	Baseline	0	14	8	43	0	0	0	1	1	1	0
945	Baseline	0	14	8	37	0	0	0	1	1	1	0
946	Baseline	0	14	8	53	0	0	0	1	1	1	1
947	Baseline	0	14	8	38	0	0	0	1	0	1	0	GastrointestinalNoneSymptoms
948	Baseline	0	14	7	39	0	0	0	1	1	0	0
949	Baseline	0	14	8	45	0	0	0	1	1	1	0	GastrointestinalNoneSymptoms
950	Baseline	0	14	9	52	0	0	0	1	1	1	0
951	Baseline	0	14	8	52	0	0	0	0	1	1	0	GastrointestinalNoneSymptoms
952	Baseline	0	14	8	44	0	0	0	0	1	1	0
953	Baseline	0	14	7	56	0	0	0	1	1	0	0	GastrointestinalNoneSymptoms
954	Baseline	0	14	8	42	0	0	0	1	1	1	0
955	Baseline	0	14	8	55	0	0	0	1	1	1	0
956	Baseline	0	14	8	45	0	0	0	1	1	1	0
957	Baseline	0	14	8	55	0	0	0	1	1	1	0
958	Baseline	0	14	8	41	0	0	0	1	1	1	0
959	Baseline	0	14	8	35	0	0	0	1	1	1	0
960	Baseline	0	14	8	46	0	0	0	1	1	1	0
961	Baseline	0	14	8	41	0	0	0	1	1	1	0
962	Baseline	0	14	8	56	0	0	0	1	1	1	0
963	Baseline	0	14	8	42	0	0	0	1	1	1	0
964	Baseline	0	14	8	47	0	0	0	1	1	1	0
965	Baseline	0	34	8	51	0	0	0	0	1	1	0
966	Baseline	0	14	8	47	0	0	0	1	1	1	0
967	Baseline	0	14	8	36	0	0	0	1	1	1	0
968	Baseline	0	35	8	55	0	0	0	1	1	1	1
969	Baseline	0	14	8	46	0	0	0	1	1	1	0
970	Baseline	0	14	8	36	0	0	0	1	1	1	0
971	Baseline	0	14	8	37	0	0	0	0	1	1	0
972	Baseline	0	50	8	42	0	0	0	0	1	1	1
973	Baseline	0	14	8	41	0	0	0	0	1	1	0
974	Baseline	0	14	8	36	0	0	0	0	1	1	0
975	Baseline	0	14	8	44	0	0	0	0	1	1	0
976	Baseline	0	35	8	34	0	0	0	1	1	1	1
977	Baseline	0	14	8	39	0	0	0	1	1	0	1
978	Baseline	0	14	8	39	0	0	0	0	1	0	0
979	Baseline	0	21	8	34	0	0	0	0	1	1	1
980	Baseline	0	14	8	36	0	0	0	1	1	0	1
981	Baseline	0	14	8	39	0	0	0	0	1	0	0	GastrointestinalNoneSymptoms
982	Baseline	0	14	8	50	0	0	0	0	1	1	0
983	Baseline	0	14	8	37	0	0	0	1	1	0	1
984	Baseline	0	14	8	48	0	0	0	0	1	0	0	Insomnia
985	Baseline	0	21	8	44	0	0	0	1	1	1	1
986	Baseline	0	14	8	39	0	0	0	0	1	0	0	CognitiveNoneSymptoms
987	Baseline	0	14	8	45	0	0	0	0	1	0	0	CognitiveNoneSymptoms
988	Baseline	0	14	8	41	0	0	0	0	1	1	0	CognitiveNoneSymptoms
989	Baseline	0	14	8	35	0	0	0	1	1	0	1
990	Baseline	0	14	9	54	0	0	0	0	1	0	0
991	Baseline	0	14	8	42	0	0	0	0	1	0	0
992	Baseline	0	14	8	52	0	0	0	0	1	0	0	Psychosis\MajorNoneMoodNoneDisorder
993	Baseline	0	14	8	45	0	0	0	1	1	0	0
994	Baseline	0	14	10	36	0	0	0	1	1	1	0
995	Baseline	0	14	10	40	0	0	0	1	1	1	0
996	Baseline	0	7	8	35	0	0	0	1	1	1	0
997	Baseline	0	14	9	46	0	0	0	1	1	1	0	Fatigue
998	Baseline	0	14	8	45	0	0	0	1	1	1	0	Fatigue
999	Baseline	0	14	8	37	0	0	0	1	1	1	0	Fatigue
1000	Baseline	0	14	9	41	0	0	0	1	1	1	0
1	Follow-Up	1	3	6	62	20	4.4	0.8	1	1	1	0	GastrointestinalNoneSymptoms
2	Follow-Up	1	10	6	40	20	4.4	0.8	1	0	0	0	DryNoneMouth
3	Follow-Up	1	6	5	48	20	4.4	0.8	0	0	0	0
4	Follow-Up	1	4	1	44	20	2	2	0	1	1	0
5	Follow-Up	1	6	8	49	20	4.4	0.8	0	0	0	0
6	Follow-Up	1	8	8	57	30	1.2	6.6	1	1	1	0	DryNoneMouth
7	Follow-Up	1	0	2	65	20	4.4	0.8	0	1	0	0	GastrointestinalNoneSymptoms
8	Follow-Up	1	7	1	64	20	4.4	0.8	1	1	1	0
9	Follow-Up	1	14	3	49	40	8.8	1.6	1	1	1	0	DryNoneMouth
10	Follow-Up	1	10	5	63	20	4.4	0.8	1	0	0	0
11	Follow-Up	1	16	9	63	20	4.4	0.8	1	1	1	1
12	Follow-Up	1	0	1	40	20	4.4	0.8	0	1	0	0	GastrointestinalNoneSymptoms
13	Follow-Up	1	3	2	52	30	6.6	1.2	1	1	1	0	DryNoneMouth
14	Follow-Up	1	11	1	51	20	4.4	0.8	0	1	1	0
15	Follow-Up	1	18	3	39	20	2	2	1	0	1	1
16	Follow-Up	1	8	2	59	20	4.4	0.8	1	1	1	0
17	Follow-Up	1	3	3	64	20	2	2	1	1	1	0	GastrointestinalNoneSymptoms
18	Follow-Up	1	48	6	60	20	4.4	0.8	1	1	1	0
19	Follow-Up	1	38	2	50	20	2	2	1	1	1	1
20	Follow-Up	1	2	5	63	20	4.4	0.8	1	1	1	0	GastrointestinalNoneSymptoms
21	Follow-Up	1	30	2	44	20	4.4	0.8	1	1	1	0
22	Follow-Up	1	48	6	43	20	4.4	0.8	1	1	1	0
23	Follow-Up	1	6	6	61	40	8.8	1.6	0	0	0	0	DryNoneMouth
24	Follow-Up	1	14	6	64	20	4.4	0.8	1	0	1	0
25	Follow-Up	1	4	2	46	20	2	2	0	1	1	0
26	Follow-Up	1	0	7	50	20	4.4	0.8	1	1	0	0	RedNoneEyes
27	Follow-Up	1	15	6	64	20	4.4	0.8	0	0	0	0
28	Follow-Up	1	0	5	52	20	4.4	0.8	1	1	0	0	GastrointestinalNoneSymptoms
29	Follow-Up	1	5	5	57	20	4.4	0.8	1	1	1	0
30	Follow-Up	1	0	8	50	40	4	4	1	1	0	0	DryNoneMouth
31	Follow-Up	1	26	7	54	20	4.4	0.8	0	1	0	1
32	Follow-Up	1	2	9	60	20	4.4	0.8	1	1	1	0	GastrointestinalNoneSymptoms
33	Follow-Up	1	21	5	50	20	4.4	0.8	0	1	1	1
34	Follow-Up	1	0	2	51	20	4.4	0.8	1	1	0	0	GastrointestinalNoneSymptoms
35	Follow-Up	1	0	8	71	20	4.4	0.8	1	1	0	0	GastrointestinalNoneSymptoms
36	Follow-Up	1	43	2	77	30	6.6	1.2	1	1	1	1	DryNoneMouth
37	Follow-Up	1	16	5	59	20	0.8	4.4	1	1	1	1
38	Follow-Up	1	7	7	70	20	4.4	0.8	1	1	1	0
39	Follow-Up	1	0	4	32	20	2	2	0	0	0	0	GastrointestinalNoneSymptoms
40	Follow-Up	1	0	5	31	20	4.4	0.8	1	0	0	0	GastrointestinalNoneSymptoms
41	Follow-Up	1	0	8	54	30	6.6	1.2	1	0	0	0	DryNoneMouth
42	Follow-Up	1	16	4	59	20	4.4	0.8	0	1	1	0
43	Follow-Up	1	0	8	65	20	4.4	0.8	1	0	0	1	GastrointestinalNoneSymptoms
44	Follow-Up	1	48	2	55	20	4.4	0.8	1	0	1	0
45	Follow-Up	1	9	6	38	20	0.8	4.4	0	0	0	0
46	Follow-Up	1	3	1	36	20	4.4	0.8	1	0	1	0	GastrointestinalNoneSymptoms
47	Follow-Up	1	0	9	45	20	2	2	1	0	0	0	GastrointestinalNoneSymptoms
48	Follow-Up	1	0	8	51	20	4.4	0.8	0	0	0	0	GastrointestinalNoneSymptoms
49	Follow-Up	1	6	1	55	20	4.4	0.8	0	0	0	0
50	Follow-Up	1	0	8	46	20	4.4	0.8	0	0	0	0	RedNoneEyes
51	Follow-Up	1	4	7	76	20	4.4	0.8	0	1	1	0	GastrointestinalNoneSymptoms
52	Follow-Up	1	26	2	36	30	3	3	0	1	1	1	DryNoneMouth
53	Follow-Up	1	0	5	40	20	4.4	0.8	0	0	0	0	GastrointestinalNoneSymptoms
54	Follow-Up	1	4	8	57	20	2	2	1	1	1	0	GastrointestinalNoneSymptoms
55	Follow-Up	1	3	1	54	20	2	2	1	0	0	0	GastrointestinalNoneSymptoms
56	Follow-Up	1	0	6	30	30	3	3	0	0	0	0	DryNoneMouth
57	Follow-Up	1	1	1	44	20	4.4	0.8	1	1	1	0
58	Follow-Up	1	0	6	27	30	6.6	1.2	0	0	0	0	DryNoneMouth
59	Follow-Up	1	20	5	68	30	6.6	1.2	0	1	0	1	DryNoneMouth
60	Follow-Up	1	12	7	41	20	0.8	4.4	1	1	1	0
61	Follow-Up	1	20	3	50	20	4.4	0.8	1	0	1	1
62	Follow-Up	1	36	5	60	20	4.4	0.8	1	0	0	1
63	Follow-Up	1	0	8	37	20	2	2	1	0	0	0	GastrointestinalNoneSymptoms
64	Follow-Up	1	17	9	41	20	2	2	1	0	0	1
65	Follow-Up	1	10	5	38	20	2	2	1	0	0	1
66	Follow-Up	1	16	2	33	20	2	2	1	0	0	1
67	Follow-Up	1	13	2	32	20	4.4	0.8	1	1	1	0
68	Follow-Up	1	4	8	32	20	4.4	0.8	1	1	1	0
69	Follow-Up	1	0	3	38	20	2	2	1	0	0	1	GastrointestinalNoneSymptoms
70	Follow-Up	1	61	3	53	20	0.8	4.4				0
71	Follow-Up	1	11	7	61	20	2	2	0	1	1	0
72	Follow-Up	1	2	1	58	20	4.4	0.8	1	1	1	0	GastrointestinalNoneSymptoms
73	Follow-Up	1	1	2	80	20	2	2	1	1	1	0	GastrointestinalNoneSymptoms
74	Follow-Up	1	19	4	51	20	4.4	0.8	0	0	0	0
75	Follow-Up	1	11	2	72	20	4.4	0.8	0	1	1	0
76	Follow-Up	1	31	1	66	20	4.4	0.8	1	1	0	1
77	Follow-Up	1	7	1	30	20	2	2	1	1	1	0
78	Follow-Up	1	0	7	44	20	0.8	4.4	1	0	0	0	GastrointestinalNoneSymptoms
79	Follow-Up	1	10	7	62	20	4.4	0.8	1	0	0	0
80	Follow-Up	1	0	1	61	20	2	2	0	0	0	0	GastrointestinalNoneSymptoms
81	Follow-Up	1	7	5	39	20	4.4	0.8	1	1	1	0
82	Follow-Up	1	0	4	49	20	4.4	0.8	0	0	0	0	GastrointestinalNoneSymptoms
83	Follow-Up	1	23	1	45	20	2	2	1	0	1	1
84	Follow-Up	1	27	6	39	30	3	3	1	0	1	1	DryNoneMouth
85	Follow-Up	1	8	2	51	20	2	2	1	1	1	0
86	Follow-Up	1	0	6	77	20	2	2	0	0	0	0	GastrointestinalNoneSymptoms
87	Follow-Up	1	24	6	63	20	4.4	0.8	0	1	0	0
88	Follow-Up	1	9	5	79	30	6.6	1.2	0	0	0	0	DryNoneMouth
89	Follow-Up	1	4	8	44	20	4.4	0.8	1	1	1	0
90	Follow-Up	1	30	1	34	20	4.4	0.8	1	1	1	1
91	Follow-Up	1	48	3	56	20	4.4	0.8	1	1	1	0
92	Follow-Up	1	4	6	46	20	4.4	0.8	1	1	1	0	GastrointestinalNoneSymptoms
93	Follow-Up	1	28	4	59	20	0.8	4.4	0	1	0	0
94	Follow-Up	1	4	4	58	20	4.4	0.8	1	1	1	0
95	Follow-Up	1	0	2	58	20	4.4	0.8	0	0	0	0	RedNoneEyes
96	Follow-Up	1	32	6	51	20	2	2	0	1	0	0
97	Follow-Up	1	0	7	72	20	4.4	0.8	0	0	0	0	GastrointestinalNoneSymptoms
98	Follow-Up	1	10	6	62	20	4.4	0.8	0	0	0	0
99	Follow-Up	1	0	3	46	20	4.4	0.8	0	0	0	0	RedNoneEyes
100	Follow-Up	1	3	2	60	20	4.4	0.8	1	0	0	0	GastrointestinalNoneSymptoms
101	Follow-Up	1	38	5	71	20	4.4	0.8	0	1	0	0
102	Follow-Up	1	0	9	27	20	2	2	0	0	0	0	RedNoneEyes
103	Follow-Up	1	16	1	55	20	2	2	1	1	1	0
104	Follow-Up	1	20	4	38	20	2	2	0	1	1	1
105	Follow-Up	1	36	6	61	20	4.4	0.8	1	1	1	0
106	Follow-Up	1	2	5	48	30	6.6	1.2	1	0	1	0	DryNoneMouth
107	Follow-Up	1	17	1	42	20	2	2	0	1	0	1
108	Follow-Up	1	0	3	51	20	4.4	0.8	0	0	0	0	GastrointestinalNoneSymptoms
109	Follow-Up	1	8	6	35	20	4.4	0.8	1	1	1	0
110	Follow-Up	1	52	5	54	20	4.4	0.8	0	0	1	1
111	Follow-Up	1	0	5	58	20	4.4	0.8	0	0	0	0	GastrointestinalNoneSymptoms
112	Follow-Up	1	12	6	43	20	2	2	1	1	1	0
113	Follow-Up	1	0	4	65	20	4.4	0.8	0	0	0	0	GastrointestinalNoneSymptoms
114	Follow-Up	1	13	2	40	20	4.4	0.8	0	1	1	0
115	Follow-Up	1	1	1	36	20	4.4	0.8	1	1	1	0	GastrointestinalNoneSymptoms
116	Follow-Up	1	28	4	32	20	4.4	0.8	1	0	1	1
117	Follow-Up	1	10	6	47	20	4.4	0.8	0	0	0	0
118	Follow-Up	1	8	7	63	20	4.4	0.8	1	1	1	0
119	Follow-Up	1	3	5	34	20	2	2	1	0	0	1	GastrointestinalNoneSymptoms
120	Follow-Up	1	1	4	52	20	4.4	0.8	1	1	1	0	GastrointestinalNoneSymptoms
121	Follow-Up	1	12	3	54	20	4.4	0.8	1	1	1	0
122	Follow-Up	1	2	1	68	30	6.6	1.2	1	0	0	0	DryNoneMouth
123	Follow-Up	1	9	2	67	20	2	2	0	0	0	0
124	Follow-Up	1	2	4	27	20	2	2	1	0	0	0	GastrointestinalNoneSymptoms
125	Follow-Up	1	6	2	52	20	2	2	0	0	0	0
126	Follow-Up	1	2	1	55	20	4.4	0.8	1	0	0	1	GastrointestinalNoneSymptoms
127	Follow-Up	1	6	2	75	20	4.4	0.8	0	0	0	0
128	Follow-Up	1	24	9	26	20	2	2	0	0	0	0
129	Follow-Up	1	26	8	54	20	4.4	0.8	1	0	1	1
130	Follow-Up	1	3	1	49	20	4.4	0.8	1	0	0	0	GastrointestinalNoneSymptoms
131	Follow-Up	1	0	3	33	20	4.4	0.8	0	1	0	0	GastrointestinalNoneSymptoms
132	Follow-Up	1	14	2	58	20	4.4	0.8	1	1	1	0
133	Follow-Up	1	8	2	39	20	4.4	0.8	1	1	1	0
134	Follow-Up	1	0	2	62	30	6.6	1.2	0	1	0	0	DryNoneMouth
135	Follow-Up	1	2	4	68	20	2	2	1	0	0	0	GastrointestinalNoneSymptoms
136	Follow-Up	1	9	1	60	20	4.4	0.8	0	0	0	0
137	Follow-Up	1	3	2	64	20	4.4	0.8	0	0	0	0	GastrointestinalNoneSymptoms
138	Follow-Up	1	5	4	75	20	4.4	0.8	1	1	1	0
139	Follow-Up	1	0	2	33	20	4.4	0.8	0	1	0	0	RedNoneEyes
140	Follow-Up	1	33	1	37	20	0.8	4.4	1	1	1	1
141	Follow-Up	1	0	6	51	20	0.8	4.4	0	1	0	0	RedNoneEyes
142	Follow-Up	1	0	3	76	20	4.4	0.8	0	1	0	0	RedNoneEyes
143	Follow-Up	1	8	6	76	20	0.8	4.4	1	1	1	0
144	Follow-Up	1	11	2	51	20	2	2	0	1	1	0
145	Follow-Up	1	39	6	41	20	4.4	0.8	0	1	1	1
146	Follow-Up	1	10	6	30	20	2	2	0	0	0	0
147	Follow-Up	1	33	7	35	20	2	2	0	1	1	1
148	Follow-Up	1	8	5	50	20	2	2	1	1	1	0
149	Follow-Up	1	2	4	39	20	4.4	0.8	0	0	0	0	GastrointestinalNoneSymptoms
150	Follow-Up	1	0	7	49	20	2	2	0	1	0	0	GastrointestinalNoneSymptoms
151	Follow-Up	1	4	6	18	20	4.4	0.8	1	0	1	0	GastrointestinalNoneSymptoms
152	Follow-Up	1	5	5	67	20	2	2	1	1	1	0
153	Follow-Up	1	35	2	65	20	4.4	0.8	1	1	1	1
154	Follow-Up	1	3	2	38	20	4.4	0.8	0	0	0	0	GastrointestinalNoneSymptoms
155	Follow-Up	1	18	4	63	20	4.4	0.8	1	1	1	1
156	Follow-Up	1	0	4	29	20	4.4	0.8	1	1	0	0	RedNoneEyes
157	Follow-Up	1	4	2	73	30	3	3	1	0	0	0	DryNoneMouth
158	Follow-Up	1	0	3	60	20	4.4	0.8	1	1	0	0	GastrointestinalNoneSymptoms
159	Follow-Up	1	10	3	14	20	4.4	0.8	0	0	0	0
160	Follow-Up	1	24	3	20	40	8.8	1.6	0	0	0	0	DryNoneMouth
161	Follow-Up	1	6	3	76	30	6.6	1.2	0	0	0	0	DryNoneMouth
162	Follow-Up	1	0	2	63	20	4.4	0.8	1	1	0	0	GastrointestinalNoneSymptoms
163	Follow-Up	1	14	2	45	20	4.4	0.8	1	1	1	0
164	Follow-Up	1	10	2	57	20	2	2	0	0	0	0
165	Follow-Up	1	18	5	14	20	4.4	0.8	0	1	1	1
166	Follow-Up	1	6	3	50	30	6.6	1.2	0	0	0	0	DryNoneMouth
167	Follow-Up	1	9	2	28	20	4.4	0.8	0	0	0	0
168	Follow-Up	1	23	3	18	20	2	2	0	1	1	1
169	Follow-Up	1	12	2	50	20	2	2	1	1	1	0
170	Follow-Up	1	25	5	30	20	2	2	0	0	0	0
171	Follow-Up	1	24	3	53	20	4.4	0.8	0	0	0	0
172	Follow-Up	1	0	8	33	20	4.4	0.8	1	1	0	0	RedNoneEyes
173	Follow-Up	1	26	1	53	20	2	2	1	0	1	1
174	Follow-Up	1	7	1	52	20	4.4	0.8	1	1	1	0
175	Follow-Up	1	0	2	51	20	4.4	0.8	1	0	0	0	RedNoneEyes
176	Follow-Up	1	7	7	15	30	6.6	1.2	1	1	1	0	DryNoneMouth
177	Follow-Up	1	39	3	30	20	4.4	0.8	1	1	1	1
178	Follow-Up	1	0	3	42	20	4.4	0.8	1	0	0	0	RedNoneEyes
179	Follow-Up	1	2	2	36	20	4.4	0.8	0	0	0	0	GastrointestinalNoneSymptoms
180	Follow-Up	1	0	6	70	20	2	2	0	0	0	0	GastrointestinalNoneSymptoms
181	Follow-Up	1	16	9	59	20	4.4	0.8	0	0	1	0
182	Follow-Up	1	0	3	17	20	4.4	0.8	0	0	0	0	RedNoneEyes
183	Follow-Up	1	9	2	23	20	4.4	0.8	0	1	0	0
184	Follow-Up	1	0	2	30	20	4.4	0.8	0	0	0	0	RedNoneEyes
185	Follow-Up	1	0	4	73	20	0.8	4.4	0	0	0	0	RedNoneEyes
186	Follow-Up	1	0	5	11	30	6.6	1.2	0	0	0	0	DryNoneMouth
187	Follow-Up	1	4	4	52	20	2	2	1	0	0	0	GastrointestinalNoneSymptoms
188	Follow-Up	1	0	2	80	20	4.4	0.8	0	0	0	0	GastrointestinalNoneSymptoms
189	Follow-Up	1	0	1	52	20	4.4	0.8	0	0	0	0	GastrointestinalNoneSymptoms
190	Follow-Up	1	17	6	52	20	4.4	0.8	0	1	1	1
191	Follow-Up	1	46	9	24	20	4.4	0.8	1	1	1	0
192	Follow-Up	1	11	4	40	20	2	2	1	0	0	1
193	Follow-Up	1	0	3	66	20	4.4	0.8	0	0	0	0	RedNoneEyes
194	Follow-Up	1	0	2	37	20	4.4	0.8	0	0	0	0	RedNoneEyes
195	Follow-Up	1	5	5	67	20	4.4	0.8	1	1	1	0
196	Follow-Up	1	0	4	15	20	4.4	0.8	0	0	0	0	GastrointestinalNoneSymptoms
197	Follow-Up	1	0	3	42	20	4.4	0.8	0	0	0	0	RedNoneEyes
198	Follow-Up	1	11	2	21	20	4.4	0.8	0	0	0	0
199	Follow-Up	1	38	2	46	20	2	2	1	0	1	1
200	Follow-Up	1	9	1	27	30	6.6	1.2	0	1	1	0	DryNoneMouth
201	Follow-Up	1	47	4	52	40	8.8	1.6	1	1	1	1	DryNoneMouth
202	Follow-Up	1	27	4	43	20	4.4	0.8	1	1	0	1
203	Follow-Up	1	27	2	73	20	2	2	0	0	1	1
204	Follow-Up	1	0	5	73	20	2	2	0	0	0	0	GastrointestinalNoneSymptoms
205	Follow-Up	1	6	2	59	20	2	2	0	0	0	0
206	Follow-Up	1	28	5	50	20	4.4	0.8	1	1	1	1
207	Follow-Up	1	45	4	47	20	4.4	0.8	1	1	1	0
208	Follow-Up	1	13	7	55	20	2	2	1	1	1	0
209	Follow-Up	1	0	5	52	20	4.4	0.8	0	0	0	0	GastrointestinalNoneSymptoms
210	Follow-Up	1	0	5	14	20	4.4	0.8	0	0	0	0	GastrointestinalNoneSymptoms
211	Follow-Up	1	0	1	60	20	4.4	0.8	0	0	0	0	RedNoneEyes
212	Follow-Up	1	39	3	37	20	4.4	0.8	0	1	0	0
213	Follow-Up	1	8	4	32	20	4.4	0.8	1	1	1	0
214	Follow-Up	1	32	3	64	30	3	3	1	0	1	1	DryNoneMouth
215	Follow-Up	1	0	2	68	30	6.6	1.2	0	0	0	0	DryNoneMouth
216	Follow-Up	1	0	3	15	30	6.6	1.2	0	0	0	0	DryNoneMouth
217	Follow-Up	1	19	6	17	20	4.4	0.8	0	0	0	0
218	Follow-Up	1	24	8	25	30	6.6	1.2	0	0	1	0	DryNoneMouth
219	Follow-Up	1	26	3	75	20	2	2	1	1	1	1
220	Follow-Up	1	8	2	63	20	4.4	0.8	1	1	1	0
221	Follow-Up	1	29	6	56	20	4.4	0.8	1	1	1	1
222	Follow-Up	1	18	7	43	20	4.4	0.8	1	1	1	1
223	Follow-Up	1	18	4	21	20	4.4	0.8	0	1	1	1
224	Follow-Up	1	4	3	68	20	4.4	0.8	1	0	0	1
225	Follow-Up	1	9	3	32	20	4.4	0.8	0	1	1	0
226	Follow-Up	1	19	1	67	20	2	2	0	0	0	0
227	Follow-Up	1	19	3	75	20	4.4	0.8	0	0	0	0
228	Follow-Up	1	21	2	44	20	4.4	0.8	1	1	1	1
229	Follow-Up	1	0	4	80	20	4.4	0.8	0	0	0	0	GastrointestinalNoneSymptoms
230	Follow-Up	1	7	6	14	20	2	2	1	1	1	0
231	Follow-Up	1	8	9	43	20	2	2	1	1	1	0
232	Follow-Up	1	0	3	68	20	2	2	0	0	0	0	GastrointestinalNoneSymptoms
233	Follow-Up	1	3	2	39	30	6.6	1.2	0	0	0	0	DryNoneMouth
234	Follow-Up	1	11	3	70	20	4.4	0.8	1	0	0	1
235	Follow-Up	1	0	9	20	20	2	2	0	0	0	0	RedNoneEyes
236	Follow-Up	1	18	7	66	20	4.4	0.8	1	1	1	1
237	Follow-Up	1	0	4	19	20	4.4	0.8	0	0	0	0	GastrointestinalNoneSymptoms
238	Follow-Up	1	16	3	35	20	4.4	0.8	1	1	1	1
239	Follow-Up	1	13	3	63	20	4.4	0.8	1	0	1	0
240	Follow-Up	1	0	1	25	20	4.4	0.8	0	0	0	0	RedNoneEyes
241	Follow-Up	1	12	7	31	30	6.6	1.2	1	1	1	0	DryNoneMouth
242	Follow-Up	1	0	0	53	20	2	2	0	0	0	0	GastrointestinalNoneSymptoms
243	Follow-Up	1	0	3	68	20	2	2	0	0	0	0	GastrointestinalNoneSymptoms
244	Follow-Up	1	0	2	83	20	2	2	0	0	0	0	RedNoneEyes
245	Follow-Up	1	0	1	63	20	2	2	0	0	0	0	RedNoneEyes
246	Follow-Up	1	0	1	78	20	2	2	0	0	0	0	RedNoneEyes
247	Follow-Up	1	0	3	38	20	2	2	0	0	0	0	GastrointestinalNoneSymptoms
248	Follow-Up	1	0	5	44	20	2	2	0	0	0	0	GastrointestinalNoneSymptoms
249	Follow-Up	1	0	0	60	20	2	2	0	0	0	0	GastrointestinalNoneSymptoms
250	Follow-Up	1	0	3	61	20	2	2	0	0	0	0	RedNoneEyes
251	Follow-Up	1	0	4	63	20	2	2	0	0	0	0	GastrointestinalNoneSymptoms
252	Follow-Up	1	1	1	46	20	2	2	1	1	1	0	GastrointestinalNoneSymptoms
253	Follow-Up	1	5	3	45	20	2	2	1	1	1	0
254	Follow-Up	1	0	2	47	20	2	2	0	0	0	0	RedNoneEyes
255	Follow-Up	1	0	1	53	20	2	2	0	0	0	0	RedNoneEyes
256	Follow-Up	1	0	2	63	20	2	2	0	0	0	0	GastrointestinalNoneSymptoms
257	Follow-Up	1	1	1	61	20	2	2	1	1	1	0	GastrointestinalNoneSymptoms
258	Follow-Up	1	0	2	60	20	2	2	0	0	0	0	GastrointestinalNoneSymptoms
259	Follow-Up	1	3	4	86	20	2	2	0	0	0	0	GastrointestinalNoneSymptoms
260	Follow-Up	1	0	6	30	20	2	2	0	0	0	0	RedNoneEyes
261	Follow-Up	1	0	4	54	20	2	2	0	0	0	0	GastrointestinalNoneSymptoms
262	Follow-Up	1	2	5	58	20	2	2	0	0	0	0	GastrointestinalNoneSymptoms
263	Follow-Up	1	0	1	53	20	2	2	0	0	0	0	RedNoneEyes
264	Follow-Up	1	0	1	41	20	2	2	0	0	0	0	GastrointestinalNoneSymptoms
265	Follow-Up	1	1	2	59	20	2	2	1	1	1	0	GastrointestinalNoneSymptoms
266	Follow-Up	1	0	5	31	20	2	2	0	0	0	0	RedNoneEyes
267	Follow-Up	1	0	6	81	20	2	2	0	0	0	0	RedNoneEyes
268	Follow-Up	1	0	4	39	20	2	2	0	0	0	0	RedNoneEyes
269	Follow-Up	1	0	1	53	20	2	2	0	0	0	0	GastrointestinalNoneSymptoms
270	Follow-Up	1	0	0	69	20	2	2	0	0	0	0	RedNoneEyes
271	Follow-Up	1	0	0	49	20	2	2	0	0	0	0	RedNoneEyes
272	Follow-Up	1	0	1	55	20	2	2	0	0	0	0	GastrointestinalNoneSymptoms
273	Follow-Up	1	3	1	38	20	2	2	0	0	0	0	GastrointestinalNoneSymptoms
274	Follow-Up	1	5	3	42	20	2	2	1	1	1	0
275	Follow-Up	1	0	4	34	20	2	2	0	0	0	0	GastrointestinalNoneSymptoms
276	Follow-Up	1	0	6	42	20	2	2	0	0	0	0	GastrointestinalNoneSymptoms
277	Follow-Up	1	0	5	35	20	2	2	0	0	0	0	RedNoneEyes
278	Follow-Up	1	0	1	58	30	3	3	0	0	0	0	DryNoneMouth
279	Follow-Up	1	0	0	62	40	4	4	0	0	0	0	DryNoneMouth
280	Follow-Up	1	0	6	64	40	4	4	0	0	0	0	DryNoneMouth
281	Follow-Up	1	0	3	89	30	3	3	0	0	0	0	DryNoneMouth
282	Follow-Up	1	0	3	59	20	2	2	0	0	0	0	GastrointestinalNoneSymptoms
283	Follow-Up	1	0	0	78	30	3	3	0	0	0	0	DryNoneMouth
284	Follow-Up	1	0	0	81	40	4	4	0	0	0	0	Hypotension
285	Follow-Up	1	0	2	46	40	4	4	0	0	0	0	DryNoneMouth
286	Follow-Up	1	0	1	44	40	4	4	0	0	0	0	DryNoneMouth
287	Follow-Up	1	0	5	71	20	2	2	0	0	0	0	GastrointestinalNoneSymptoms
288	Follow-Up	1	0	1	66	30	3	3	0	0	0	0	DryNoneMouth
289	Follow-Up	1	0	1	42	20	2	2	0	0	0	0	GastrointestinalNoneSymptoms
290	Follow-Up	1	0	6	57	40	4	4	0	0	0	0	DryNoneMouth
291	Follow-Up	1	0	2	56	20	2	2	0	0	0	0	RedNoneEyes
292	Follow-Up	1	0	5	49	40	4	4	0	0	0	0	DryNoneMouth
293	Follow-Up	1	0	0	61	20	2	2	0	0	0	0	GastrointestinalNoneSymptoms
294	Follow-Up	1	0	0	81	40	4	4	0	0	0	0	DryNoneMouth
295	Follow-Up	1	0	5	78	30	3	3	0	0	0	0	DryNoneMouth
296	Follow-Up	1	0	2	84	40	4	4	0	0	0	0	CognitiveNoneSymptoms
297	Follow-Up	1	3	3	57	40	4	4	0	0	0	0	DryNoneMouth
298	Follow-Up	1	0	4	43	20	2	2	0	0	0	0	GastrointestinalNoneSymptoms
299	Follow-Up	1	0	5	68	20	2	2	0	0	0	0	GastrointestinalNoneSymptoms
300	Follow-Up	1	0	6	52	30	3	3	0	0	0	0	DryNoneMouth
301	Follow-Up	1	0	0	53	20	2	2	0	0	0	0	RedNoneEyes
302	Follow-Up	1	0	3	63	30	3	3	0	0	0	0	DryNoneMouth
303	Follow-Up	1	0	0	77	20	2	2	0	0	0	0	GastrointestinalNoneSymptoms
304	Follow-Up	1	0	1	47	40	4	4	0	0	0	0	DryNoneMouth
305	Follow-Up	1	0	3	77	20	2	2	0	0	0	0	GastrointestinalNoneSymptoms
306	Follow-Up	1	0	2	74	40	4	4	0	0	0	0	CognitiveNoneSymptoms
307	Follow-Up	1	0	5	50	40	4	4	0	0	0	0	DryNoneMouth
308	Follow-Up	1	0	6	65	40	4	4	0	0	0	0	Hypotension
309	Follow-Up	1	0	2	67	30	3	3	0	0	0	0	DryNoneMouth
310	Follow-Up	1	0	3	38	40	4	4	0	0	0	0	DryNoneMouth
311	Follow-Up	1	0	3	64	40	4	4	0	0	0	0	CognitiveNoneSymptoms
312	Follow-Up	1	0	2	45	40	4	4	0	0	0	0	CognitiveNoneSymptoms
313	Follow-Up	1	1	6	74	40	4	4	1	0	1	0	DryNoneMouth
314	Follow-Up	1	0	3	66	40	4	4	0	0	0	0	CognitiveNoneSymptoms
315	Follow-Up	1	0	6	41	40	4	4	0	0	0	0	Hypotension
316	Follow-Up	1	2	4	51	40	4	4	0	0	0	0	DryNoneMouth
317	Follow-Up	1	0	0	40	30	3	3	0	0	0	0	DryNoneMouth
318	Follow-Up	1	0	0	66	20	2	2	0	0	0	0	GastrointestinalNoneSymptoms
319	Follow-Up	1	0	5	63	30	3	3	0	0	0	0	DryNoneMouth
320	Follow-Up	1	0	1	53	30	3	3	0	0	0	0	DryNoneMouth
321	Follow-Up	1	0	1	65	40	4	4	0	0	0	0	DryNoneMouth
322	Follow-Up	1	0	0	50	30	3	3	0	0	0	0	DryNoneMouth
323	Follow-Up	1	0	5	48	30	3	3	0	0	0	0	DryNoneMouth
324	Follow-Up	1	0	3	47	20	2	2	0	0	0	0	RedNoneEyes
325	Follow-Up	1	0	6	55	20	2	2	0	0	0	0	RedNoneEyes
326	Follow-Up	1	0	0	67	30	3	3	0	0	0	0	DryNoneMouth
327	Follow-Up	1	0	0	36	20	2	2	0	0	0	0	GastrointestinalNoneSymptoms
328	Follow-Up	1	0	0	60	30	3	3	0	0	0	0	DryNoneMouth
329	Follow-Up	1	0	0	67	40	4	4	0	0	0	0
330	Follow-Up	1	0	0	80	40	4	4	0	0	0	0	DryNoneMouth
331	Follow-Up	1	0	0	63	30	3	3	0	0	0	0	DryNoneMouth
332	Follow-Up	1	0	1	29	40	4	4	0	0	0	0	DryNoneMouth
333	Follow-Up	1	0	4	42	30	3	3	0	0	0	0	DryNoneMouth
334	Follow-Up	1	1	6	66	30	3	3	1	0	0	0	DryNoneMouth
335	Follow-Up	1	0	4	75	40	4	4	0	0	0	0
336	Follow-Up	1	0	4	37	20	2	2	0	0	0	0	RedNoneEyes
337	Follow-Up	1	0	2	59	20	2	2	0	0	0	0	RedNoneEyes
338	Follow-Up	1	0	0	60	40	4	4	0	0	0	0	DryNoneMouth
339	Follow-Up	1	1	3	32	20	2	2	1	0	0	0	GastrointestinalNoneSymptoms
340	Follow-Up	1	2	2	70	40	4	4	0	0	0	0	DryNoneMouth
341	Follow-Up	1	0	3	40	40	4	4	0	0	0	0	DryNoneMouth
342	Follow-Up	1	2	4	66	30	3	3	1	0	0	0	DryNoneMouth
343	Follow-Up	1	0	4	67	20	2	2	0	0	0	0	RedNoneEyes
344	Follow-Up	1	0	3	73	30	3	3	0	0	0	0	DryNoneMouth
345	Follow-Up	1	0	6	67	20	2	2	0	0	0	0	GastrointestinalNoneSymptoms
346	Follow-Up	1	0	6	87	30	3	3	0	0	0	0	DryNoneMouth
347	Follow-Up	1	0	3	35	20	2	2	0	0	0	0	GastrointestinalNoneSymptoms
348	Follow-Up	1	0	6	48	30	3	3	0	0	0	0	DryNoneMouth
349	Follow-Up	1	0	6	52	30	3	3	0	0	0	0	DryNoneMouth
350	Follow-Up	1	0	0	75	30	3	3	0	0	0	0	DryNoneMouth
351	Follow-Up	1	0	3	85	30	3	3	0	0	0	0	DryNoneMouth
352	Follow-Up	1	1	1	47	30	3	3	1	0	0	1	DryNoneMouth
353	Follow-Up	1	0	2	52	40	4	4	0	0	0	0	DryNoneMouth
354	Follow-Up	1	0	4	47	20	2	2	0	0	0	0	GastrointestinalNoneSymptoms
355	Follow-Up	1	0	4	32	30	3	3	0	0	0	0	DryNoneMouth
356	Follow-Up	1	0	2	68	20	2	2	0	0	0	0	GastrointestinalNoneSymptoms
357	Follow-Up	1	0	0	40	40	4	4	0	0	0	0	DryNoneMouth
358	Follow-Up	1	0	0	48	40	4	4	0	0	0	0	DryNoneMouth
359	Follow-Up	1	2	6	31	20	2	2	1	0	0	1	GastrointestinalNoneSymptoms
360	Follow-Up	1	1	5	42	20	2	2	1	0	0	0	GastrointestinalNoneSymptoms
361	Follow-Up	1	0	0	55	20	2	2	0	0	0	0	GastrointestinalNoneSymptoms
362	Follow-Up	1	0	6	54	30	3	3	0	0	0	0	DryNoneMouth
363	Follow-Up	1	0	6	43	40	4	4	0	0	0	0	DryNoneMouth
364	Follow-Up	1	0	1	47	30	3	3	0	0	0	0	DryNoneMouth
365	Follow-Up	1	0	0	47	40	4	4	0	0	0	0	DryNoneMouth
366	Follow-Up	1	0	3	34	20	2	2	0	0	0	0	GastrointestinalNoneSymptoms
367	Follow-Up	1	0	5	44	20	2	2	0	0	0	0	GastrointestinalNoneSymptoms
368	Follow-Up	1	0	5	45	40	4	4	0	0	0	0	DryNoneMouth
369	Follow-Up	1	0	0	40	20	2	2	0	0	0	0	RedNoneEyes
370	Follow-Up	1	0	0	52	30	3	3	0	0	0	0	DryNoneMouth
371	Follow-Up	1	0	1	40	30	3	3	0	0	0	0	DryNoneMouth
372	Follow-Up	1	0	4	34	40	4	4	0	0	0	0	CognitiveNoneSymptoms
373	Follow-Up	1	0	5	34	30	3	3	0	0	0	0	DryNoneMouth
374	Follow-Up	1	0	4	55	40	4	4	0	0	0	0	Hypotension
375	Follow-Up	1	0	1	51	20	2	2	0	0	0	0	GastrointestinalNoneSymptoms
376	Follow-Up	1	0	4	45	40	4	4	0	0	0	0	CognitiveNoneSymptoms
377	Follow-Up	1	0	0	63	20	2	2	0	0	0	0	GastrointestinalNoneSymptoms
378	Follow-Up	1	0	0	56	40	4	4	0	0	0	0	Hypotension
379	Follow-Up	1	0	2	46	20	2	2	0	0	0	0	GastrointestinalNoneSymptoms
380	Follow-Up	1	0	4	55	30	3	3	0	0	0	0	DryNoneMouth
381	Follow-Up	1	3	4	53	40	4	4	0	0	0	0	DryNoneMouth
382	Follow-Up	1	0	2	46	20	2	2	0	0	0	0	RedNoneEyes
383	Follow-Up	1	0	5	45	40	4	4	0	0	0	0	DryNoneMouth
384	Follow-Up	1	0	6	45	30	3	3	0	0	0	0	DryNoneMouth
385	Follow-Up	1	0	6	48	40	4	4	0	0	0	0	DryNoneMouth
386	Follow-Up	1	1	4	32	30	3	3	0	0	0	0	DryNoneMouth
387	Follow-Up	1	0	0	68	30	3	3	0	0	0	0	DryNoneMouth
388	Follow-Up	1	0	3	45	30	3	3	0	0	0	0	DryNoneMouth
389	Follow-Up	1	0	4	50	40	4	4	0	0	0	0
390	Follow-Up	1	1	4	52	40	4	4	0	0	0	0	DryNoneMouth
391	Follow-Up	1	0	6	32	40	4	4	0	0	0	0
392	Follow-Up	1	0	5	49	40	4	4	0	0	0	0	DryNoneMouth
393	Follow-Up	1	0	1	51	20	2	2	0	0	0	0	GastrointestinalNoneSymptoms
394	Follow-Up	1	0	6	60	30	3	3	0	0	0	0	DryNoneMouth
395	Follow-Up	1	2	6	59	30	3	3	1	0	0	0	DryNoneMouth
396	Follow-Up	1	0	0	58	20	2	2	0	0	0	0	GastrointestinalNoneSymptoms
397	Follow-Up	1	3	2	46	20	2	2	0	0	0	0	GastrointestinalNoneSymptoms
398	Follow-Up	1	0	6	66	30	3	3	0	0	0	0	DryNoneMouth
399	Follow-Up	1	0	1	53	20	2	2	0	0	0	0	GastrointestinalNoneSymptoms
400	Follow-Up	1	0	2	44	20	2	2	0	0	0	0	GastrointestinalNoneSymptoms
401	Follow-Up	1	0	0	48	40	4	4	0	0	0	0	DryNoneMouth
402	Follow-Up	1	0	3	60	30	3	3	0	0	0	0	DryNoneMouth
403	Follow-Up	1	0	2	69	20	2	2	0	0	0	0	GastrointestinalNoneSymptoms
404	Follow-Up	1	0	1	54	20	2	2	0	0	0	0	GastrointestinalNoneSymptoms
405	Follow-Up	1	0	6	48	40	4	4	0	0	0	0	DryNoneMouth
406	Follow-Up	1	0	2	53	20	2	2	0	0	0	0	GastrointestinalNoneSymptoms
407	Follow-Up	1	0	6	59	30	3	3	0	0	0	0	DryNoneMouth
408	Follow-Up	1	0	1	39	40	4	4	0	0	0	0	Hypotension
409	Follow-Up	1	0	6	52	20	2	2	0	0	0	0	GastrointestinalNoneSymptoms
410	Follow-Up	1	1	4	47	20	2	2	0	0	0	0	GastrointestinalNoneSymptoms
411	Follow-Up	1	0	3	54	20	2	2	0	0	0	0	RedNoneEyes
412	Follow-Up	1	0	2	50	30	3	3	0	0	0	0	DryNoneMouth
413	Follow-Up	1	0	2	32	40	4	4	0	0	0	0
414	Follow-Up	1	0	5	40	30	3	3	0	0	0	0	DryNoneMouth
415	Follow-Up	1	0	5	34	40	4	4	0	0	0	0	Hypotension
416	Follow-Up	1	0	6	38	20	2	2	0	0	0	0	GastrointestinalNoneSymptoms
417	Follow-Up	1	0	3	60	30	3	3	0	0	0	0	DryNoneMouth
418	Follow-Up	1	0	3	69	20	2	2	0	0	0	0	GastrointestinalNoneSymptoms
419	Follow-Up	1	0	3	55	40	4	4	0	0	0	0
420	Follow-Up	1	0	0	47	20	2	2	0	0	0	0	GastrointestinalNoneSymptoms
421	Follow-Up	1	0	1	54	20	2	2	0	0	0	0	RedNoneEyes
422	Follow-Up	1	1	6	35	30	3	3	0	0	0	0	DryNoneMouth
423	Follow-Up	1	0	5	64	40	4	4	0	0	0	0	DryNoneMouth
424	Follow-Up	1	2	2	59	30	3	3	0	0	0	0	DryNoneMouth
425	Follow-Up	1	0	0	71	20	2	2	0	0	0	0	GastrointestinalNoneSymptoms
426	Follow-Up	1	0	0	32	20	2	2	0	0	0	0	RedNoneEyes
427	Follow-Up	1	0	6	52	30	3	3	0	0	0	0	DryNoneMouth
428	Follow-Up	1	2	4	63	20	2	2	0	0	0	0	GastrointestinalNoneSymptoms
429	Follow-Up	1	0	1	50	40	4	4	0	0	0	0	DryNoneMouth
430	Follow-Up	1	0	6	53	40	4	4	0	0	0	0	CognitiveNoneSymptoms
431	Follow-Up	1	1	2	63	30	3	3	0	0	0	0	DryNoneMouth
432	Follow-Up	1	0	1	72	40	4	4	0	0	0	0	Hypotension
433	Follow-Up	1	0	5	52	20	2	2	0	0	0	0	RedNoneEyes
434	Follow-Up	1	0	1	54	20	3	0.8	0	0	0	0	GastrointestinalNoneSymptoms
435	Follow-Up	1	0	5	61	30	4.5	1.2	0	0	0	0	DryNoneMouth
436	Follow-Up	1	0	6	42	20	2	2	0	0	0	0	GastrointestinalNoneSymptoms
437	Follow-Up	1	0	2	33	30	3	3	0	0	0	0	DryNoneMouth
438	Follow-Up	1	0	1	47	30	3	3	0	0	0	0	DryNoneMouth
439	Follow-Up	1	0	1	62	20	3	0.8	0	0	0	0	GastrointestinalNoneSymptoms
440	Follow-Up	1	0	5	57	20	3	0.8	0	0	0	0	RedNoneEyes
441	Follow-Up	1	0	0	53	30	4.5	1.2	0	0	0	0	DryNoneMouth
442	Follow-Up	1	0	2	36	30	4.5	1.2	0	0	0	0	DryNoneMouth
443	Follow-Up	1	0	6	41	20	3	0.8	0	0	0	0	RedNoneEyes
444	Follow-Up	1	0	4	54	20	3	0.8	0	0	0	0	RedNoneEyes
445	Follow-Up	1	0	6	54	40	6	1.6	0	0	0	0	CognitiveNoneSymptoms
446	Follow-Up	1	0	5	52	20	3	0.8	0	0	0	0	RedNoneEyes
447	Follow-Up	1	1	6	55	30	4.5	1.2	0	0	0	0	DryNoneMouth
448	Follow-Up	1	0	6	64	30	4.5	1.2	0	0	0	0	DryNoneMouth
449	Follow-Up	1	0	1	38	40	6	1.6	0	0	0	0
450	Follow-Up	1	0	6	58	40	6	1.6	0	0	0	0	CognitiveNoneSymptoms
451	Follow-Up	1	0	0	73	30	4.5	1.2	0	0	0	0	DryNoneMouth
452	Follow-Up	1	0	6	63	20	3	0.8	0	0	0	0	GastrointestinalNoneSymptoms
453	Follow-Up	1	1	6	58	30	4.5	1.2	0	0	0	0	DryNoneMouth
454	Follow-Up	1	0	1	56	30	4.5	1.2	0	0	0	0	DryNoneMouth
455	Follow-Up	1	0	3	54	40	6	1.6	0	0	0	0	DryNoneMouth
456	Follow-Up	1	0	0	38	30	4.5	1.2	0	0	0	0	DryNoneMouth
457	Follow-Up	1	2	6	57	20	3	0.8	0	0	0	0	GastrointestinalNoneSymptoms
458	Follow-Up	1	5	2	62	40	4	4	1	1	1	0	DryNoneMouth
459	Follow-Up	1	1	2	56	30	3	3	0	0	0	0	DryNoneMouth
460	Follow-Up	1	0	2	58	40	4	4	0	0	0	0	DryNoneMouth
461	Follow-Up	1	0	4	65	40	4	4	0	0	0	0	DryNoneMouth
462	Follow-Up	1	2	4	63	40	4	4	0	0	0	0	DryNoneMouth
463	Follow-Up	1	0	1	57	40	4	4	0	0	0	0	Hypotension
464	Follow-Up	1	0	6	53	20	4	0.8	0	0	0	0	RedNoneEyes
465	Follow-Up	1	0	2	49	40	8	1.6	0	0	0	0	DryNoneMouth
466	Follow-Up	1	0	2	57	20	4	0.8	0	0	0	0	RedNoneEyes
467	Follow-Up	1	0	1	56	40	8	1.6	0	0	0	0	CognitiveNoneSymptoms
468	Follow-Up	1	0	3	49	20	4	0.8	0	0	0	0	GastrointestinalNoneSymptoms
469	Follow-Up	1	0	5	50	20	4	0.8	0	0	0	0
470	Follow-Up	1	0	3	60	30	6	1.2	0	0	0	0	DryNoneMouth
471	Follow-Up	1	0	4	62	30	6	1.2	0	0	0	0	DryNoneMouth
472	Follow-Up	1	0	5	60	20	4	0.8	0	0	0	0	GastrointestinalNoneSymptoms
473	Follow-Up	1	0	2	36	20	4	0.8	0	0	0	0	GastrointestinalNoneSymptoms
474	Follow-Up	1	0	5	73	20	4	0.8	0	0	0	0	GastrointestinalNoneSymptoms
475	Follow-Up	1	0	2	54	20	4	0.8	0	0	0	0	GastrointestinalNoneSymptoms
476	Follow-Up	1	3	5	69	20	4	0.8	0	0	0	0	GastrointestinalNoneSymptoms
477	Follow-Up	1	1	5	59	40	8	1.6	0	0	0	0	DryNoneMouth
478	Follow-Up	1	0	4	50	40	8	1.6	0	0	0	0	DryNoneMouth
479	Follow-Up	1	0	2	63	40	8	1.6	0	0	0	0	CognitiveNoneSymptoms
480	Follow-Up	1	1	3	40	20	4	0.8	0	0	0	0	GastrointestinalNoneSymptoms
481	Follow-Up	1	0	1	51	30	6	1.2	0	0	0	0	DryNoneMouth
482	Follow-Up	1	0	4	71	30	6	1.2	0	0	0	0	DryNoneMouth
483	Follow-Up	1	0	3	46	30	6	1.2	0	0	0	0	DryNoneMouth
484	Follow-Up	1	0	2	32	20	4	0.8	0	0	0	0	GastrointestinalNoneSymptoms
485	Follow-Up	1	0	1	47	20	4	0.8	0	0	0	0	RedNoneEyes
486	Follow-Up	1	0	2	66	20	4	0.8	0	0	0	0	GastrointestinalNoneSymptoms
487	Follow-Up	1	0	4	57	30	6	1.2	0	0	0	0	DryNoneMouth
488	Follow-Up	1	1	6	40	40	8	1.6	0	1	0	0	DryNoneMouth
489	Follow-Up	1	0	3	40	40	8	1.6	0	0	0	0	DryNoneMouth
490	Follow-Up	1	0	4	61	30	6	1.2	0	0	0	0	DryNoneMouth
491	Follow-Up	1	2	4	41	30	6	1.2	0	0	0	0	DryNoneMouth
492	Follow-Up	1	0	6	57	30	6	1.2	0	0	0	0	DryNoneMouth
493	Follow-Up	1	0	5	52	20	4	0.8	0	0	0	0	GastrointestinalNoneSymptoms
494	Follow-Up	1	2	4	68	40	8	1.6	0	0	0	0	DryNoneMouth
495	Follow-Up	1	0	2	39	40	8	1.6	0	0	0	0
496	Follow-Up	1	0	2	63	30	6	1.2	0	0	0	0	DryNoneMouth
497	Follow-Up	1	0	6	65	40	8	1.6	0	0	0	0	CognitiveNoneSymptoms
498	Follow-Up	1	0	4	42	30	6	1.2	0	0	0	0	DryNoneMouth
499	Follow-Up	1	0	5	52	20	4	0.8	0	0	0	0	GastrointestinalNoneSymptoms
500	Follow-Up	1	1	6	39	40	8	1.6	0	1	1	0	DryNoneMouth
501	Follow-Up	1	0	0	51	30	6	1.2	0	0	0	0	DryNoneMouth
502	Follow-Up	1	0	4	56	20	4	0.8	0	0	0	0	GastrointestinalNoneSymptoms
503	Follow-Up	1	0	1	36	30	6	1.2	0	0	0	0	DryNoneMouth
504	Follow-Up	1	0	2	45	30	6	1.2	0	0	0	0	DryNoneMouth
505	Follow-Up	1	0	2	52	30	3	3	0	0	0	0	DryNoneMouth
506	Follow-Up	1	0	3	46	30	3	3	0	0	0	0	DryNoneMouth
507	Follow-Up	1	0	2	53	20	2	2	0	0	0	0	GastrointestinalNoneSymptoms
508	Follow-Up	1	0	0	54	20	2	2	0	0	0	0	GastrointestinalNoneSymptoms
509	Follow-Up	1	0	1	49	30	3	3	0	0	0	0	DryNoneMouth
510	Follow-Up	1	0	6	44	30	3	3	0	0	0	0	DryNoneMouth
511	Follow-Up	1	0	4	61	40	4	4	0	0	0	0
512	Follow-Up	1	0	4	51	40	4	4	0	0	0	0	DryNoneMouth
513	Follow-Up	1	0	0	48	40	4	4	0	0	0	0	DryNoneMouth
514	Follow-Up	1	0	1	41	40	4	4	0	0	0	0	DryNoneMouth
515	Follow-Up	1	0	5	39	40	4	4	0	0	0	0	DryNoneMouth
516	Follow-Up	1	0	4	49	30	3	3	0	0	0	0	DryNoneMouth
517	Follow-Up	1	0	2	58	30	3	3	0	0	0	0	DryNoneMouth
518	Follow-Up	1	0	5	51	30	3	3	0	0	0	0	DryNoneMouth
519	Follow-Up	1	0	4	59	20	2	2	0	0	0	0	RedNoneEyes
520	Follow-Up	1	0	4	46	20	2	2	0	0	0	0	GastrointestinalNoneSymptoms
521	Follow-Up	1	0	0	64	40	4	4	0	0	0	0	Hypotension
522	Follow-Up	1	0	2	47	40	4	4	0	0	0	0	CognitiveNoneSymptoms
523	Follow-Up	1	0	6	53	30	3	3	0	0	0	0	DryNoneMouth
524	Follow-Up	1	5	1	52	20	2	2	1	1	1	1
525	Follow-Up	1	0	0	66	40	4	4	0	0	0	0	Hypotension
526	Follow-Up	1	0	3	69	40	4	4	0	0	0	0	DryNoneMouth
527	Follow-Up	1	0	0	57	20	2	2	0	0	0	0	GastrointestinalNoneSymptoms
528	Follow-Up	1	0	5	72	30	3	3	0	0	0	0	DryNoneMouth
529	Follow-Up	1	0	0	58	20	2	2	0	0	0	0	GastrointestinalNoneSymptoms
530	Follow-Up	1	0	1	66	40	4	4	0	0	0	0	DryNoneMouth
531	Follow-Up	1	1	1	45	40	4	4	0	1	1	0	DryNoneMouth
532	Follow-Up	1	1	0	55	20	2	2	0	1	1	0	GastrointestinalNoneSymptoms
533	Follow-Up	1	0	4	46	30	3	3	0	0	0	0	DryNoneMouth
534	Follow-Up	1	0	0	46	20	2	2	0	0	0	0	GastrointestinalNoneSymptoms
535	Follow-Up	1	0	4	45	40	4	4	0	0	0	0	DryNoneMouth
536	Follow-Up	1	0	2	57	40	4	4	0	0	0	0
537	Follow-Up	1	1	4	35	30	3	3	0	1	1	0	DryNoneMouth
538	Follow-Up	1	0	2	52	40	4	4	0	0	0	0	DryNoneMouth
539	Follow-Up	1	0	4	56	30	3	3	0	0	0	0	DryNoneMouth
540	Follow-Up	1	0	0	60	20	2	2	0	0	0	0	RedNoneEyes
541	Follow-Up	1	0	1	59	30	3	3	0	0	0	0	DryNoneMouth
542	Follow-Up	1	0	4	51	30	3	3	0	0	0	0	DryNoneMouth
543	Follow-Up	1	1	0	52	40	4	4	1	1	1	0	DryNoneMouth
544	Follow-Up	1	1	3	56	20	2	2	1	1	1	0	GastrointestinalNoneSymptoms
545	Follow-Up	1	0	3	50	40	4	4	0	0	0	0	CognitiveNoneSymptoms
546	Follow-Up	1	0	2	58	30	3	3	0	0	0	0	DryNoneMouth
547	Follow-Up	1	2	1	50	20	2	2	0	0	0	0	GastrointestinalNoneSymptoms
548	Follow-Up	1	0	6	51	20	2	2	0	0	0	0	GastrointestinalNoneSymptoms
549	Follow-Up	1	0	4	63	20	2	2	0	0	0	0	RedNoneEyes
550	Follow-Up	1	0	0	52	20	2	2	0	0	0	0	GastrointestinalNoneSymptoms
551	Follow-Up	1	0	1	46	20	2	2	0	0	0	0	GastrointestinalNoneSymptoms
552	Follow-Up	1	0	3	35	20	2	2	0	0	0	0	RedNoneEyes
553	Follow-Up	1	0	3	57	20	2	2	0	0	0	0	GastrointestinalNoneSymptoms
554	Follow-Up	1	0	3	66	30	3	3	0	0	0	0	DryNoneMouth
555	Follow-Up	1	0	0	69	40	4	4	0	0	0	0	Hypotension
556	Follow-Up	1	1	6	69	30	3	3	1	1	1	0	DryNoneMouth
557	Follow-Up	1	1	0	67	30	3	3	1	1	1	0	DryNoneMouth
558	Follow-Up	1	0	6	55	20	2	2	0	0	0	0	RedNoneEyes
559	Follow-Up	1	0	1	36	40	4	4	0	0	0	0
560	Follow-Up	1	0	0	35	40	4	4	0	0	0	0	DryNoneMouth
561	Follow-Up	1	1	6	38	30	3	3	1	1	1	0	DryNoneMouth
562	Follow-Up	1	0	5	41	30	3	3	0	0	0	0	DryNoneMouth
563	Follow-Up	1	0	2	46	40	4	4	0	0	0	0	DryNoneMouth
564	Follow-Up	1	0	4	36	40	4	4	0	0	0	0	DryNoneMouth
565	Follow-Up	1	0	1	53	20	2	2	0	0	0	0	GastrointestinalNoneSymptoms
566	Follow-Up	1	1	0	55	30	3	3	1	0	1	0	DryNoneMouth
567	Follow-Up	1	0	4	59	20	2	2	0	0	0	0	GastrointestinalNoneSymptoms
568	Follow-Up	1	0	3	59	30	3	3	0	0	0	0	DryNoneMouth
569	Follow-Up	1	0	3	54	30	3	3	0	0	0	0	DryNoneMouth
570	Follow-Up	1	0	2	66	40	4	4	0	0	0	0
571	Follow-Up	1	0	4	68	30	3	3	0	0	0	0	DryNoneMouth
572	Follow-Up	1	0	4	68	40	4	4	0	0	0	0	DryNoneMouth
573	Follow-Up	1	0	0	51	20	2	2	0	0	0	0	GastrointestinalNoneSymptoms
574	Follow-Up	1	0	5	62	20	2	2	0	0	0	0	GastrointestinalNoneSymptoms
575	Follow-Up	1	0	1	71	40	4	4	0	0	0	0	DryNoneMouth
576	Follow-Up	1	0	1	57	40	4	4	0	0	0	0	CognitiveNoneSymptoms
577	Follow-Up	1	0	5	59	30	3	3	0	0	0	0	DryNoneMouth
578	Follow-Up	1	0	6	45	40	4	4	0	0	0	0	DryNoneMouth
579	Follow-Up	1	0	1	37	40	4	4	0	0	0	0	Hypotension
580	Follow-Up	1	0	3	66	30	3	3	0	0	0	0	DryNoneMouth
581	Follow-Up	1	0	1	42	30	3	3	0	0	0	0	DryNoneMouth
582	Follow-Up	1	0	3	72	40	4	4	0	0	0	0
583	Follow-Up	1	0	3	48	40	4	4	0	0	0	0
584	Follow-Up	1	5	5	37	20	2	2	1	1	1	0
585	Follow-Up	1	0	2	46	30	3	3	0	0	0	0	DryNoneMouth
586	Follow-Up	1	2	6	48	20	2	2	0	0	0	0	GastrointestinalNoneSymptoms
587	Follow-Up	1	0	3	43	30	3	3	0	0	0	0	DryNoneMouth
588	Follow-Up	1	0	6	69	40	4	4	0	0	0	0
589	Follow-Up	1	0	5	46	40	4	4	0	0	0	0	DryNoneMouth
590	Follow-Up	1	0	3	59	30	3	3	0	0	0	0	DryNoneMouth
591	Follow-Up	1	0	6	39	30	3	3	0	0	0	0	DryNoneMouth
592	Follow-Up	1	0	1	48	20	2	2	0	0	0	0	GastrointestinalNoneSymptoms
593	Follow-Up	1	0	0	51	40	4	4	0	0	0	0	DryNoneMouth
594	Follow-Up	1	0	5	53	40	4	4	0	0	0	0	DryNoneMouth
595	Follow-Up	1	0	1	45	20	2	2	0	0	0	0	GastrointestinalNoneSymptoms
596	Follow-Up	1	0	6	51	30	3	3	0	0	0	0	DryNoneMouth
597	Follow-Up	1	0	4	60	40	4	4	0	0	0	0	DryNoneMouth
598	Follow-Up	1	0	4	43	20	2	2	0	0	0	0	RedNoneEyes
599	Follow-Up	1	0	4	60	40	4	4	0	0	0	0	Hypotension
600	Follow-Up	1	0	3	46	20	2	2	0	0	0	0	RedNoneEyes
601	Follow-Up	1	0	0	50	20	2	2	0	0	0	0	GastrointestinalNoneSymptoms
602	Follow-Up	1	0	5	70	20	2	2	0	0	0	0	RedNoneEyes
603	Follow-Up	1	1	1	50	40	4	4	1	0	0	0	DryNoneMouth
604	Follow-Up	1	0	0	34	30	3	3	0	0	0	0	DryNoneMouth
605	Follow-Up	1	0	2	69	20	2	2	0	0	0	0	GastrointestinalNoneSymptoms
606	Follow-Up	1	2	1	58	30	3	3	0	0	0	0	DryNoneMouth
607	Follow-Up	1	0	6	55	30	3	3	0	0	0	0	DryNoneMouth
608	Follow-Up	1	3	3	54	30	3	3	0	0	0	0	DryNoneMouth
609	Follow-Up	1	0	4	56	40	4	4	0	0	0	0
610	Follow-Up	1	0	0	53	20	2	2	0	0	0	0	RedNoneEyes
611	Follow-Up	1	0	1	52	30	3	3	0	0	0	0	DryNoneMouth
612	Follow-Up	1	3	3	60	20	2	2	0	1	0	0	GastrointestinalNoneSymptoms
613	Follow-Up	1	1	2	64	20	2	2	1	0	0	0	GastrointestinalNoneSymptoms
614	Follow-Up	1	0	4	40	40	4	4	0	0	0	0	DryNoneMouth
615	Follow-Up	1	0	1	39	30	3	3	0	0	0	0	DryNoneMouth
616	Follow-Up	1	0	6	52	30	3	3	0	0	0	0	DryNoneMouth
617	Follow-Up	1	0	0	66	30	3	3	0	0	0	0	DryNoneMouth
618	Follow-Up	1	2	4	45	40	4	4	0	0	0	0	DryNoneMouth
619	Follow-Up	1	0	3	58	20	2	2	0	0	0	0	GastrointestinalNoneSymptoms
620	Follow-Up	1	0	2	48	30	3	3	0	0	0	0	DryNoneMouth
621	Follow-Up	1	0	3	59	30	3	3	0	0	0	0	DryNoneMouth
622	Follow-Up	1	0	0	59	20	2	2	0	0	0	0	GastrointestinalNoneSymptoms
623	Follow-Up	1	0	5	56	40	4	4	0	0	0	0	Hypotension
624	Follow-Up	1	0	0	58	30	3	3	0	0	0	0	DryNoneMouth
625	Follow-Up	1	0	3	34	20	2	2	0	0	0	0	RedNoneEyes
626	Follow-Up	1	0	6	73	20	2	2	0	0	0	0	GastrointestinalNoneSymptoms
627	Follow-Up	1	0	5	42	40	4	4	0	0	0	0	Hypotension
628	Follow-Up	1	0	5	65	30	3	3	0	0	0	0	DryNoneMouth
629	Follow-Up	1	0	4	40	40	4	4	0	0	0	0	DryNoneMouth
630	Follow-Up	1	0	5	44	30	3	3	0	0	0	0	DryNoneMouth
631	Follow-Up	1	1	5	45	40	4	4	1	0	0	1	DryNoneMouth
632	Follow-Up	1	0	0	66	20	2	2	0	0	0	0	GastrointestinalNoneSymptoms
633	Follow-Up	1	0	4	48	30	3	3	0	0	0	0	DryNoneMouth
634	Follow-Up	1	0	4	59	40	4	4	0	0	0	0	Hypotension
635	Follow-Up	1	5	2	33	30	3	3	1	1	1	0	DryNoneMouth
636	Follow-Up	1	0	3	57	20	2	2	0	0	0	0	GastrointestinalNoneSymptoms
637	Follow-Up	1	0	4	56	40	4	4	0	0	0	0	Hypotension
638	Follow-Up	1	0	0	37	40	4	4	0	0	0	0
639	Follow-Up	1	1	6	68	20	2	2	1	0	0	0	GastrointestinalNoneSymptoms
640	Follow-Up	1	0	2	43	40	4	4	0	0	0	0	DryNoneMouth
641	Follow-Up	1	0	1	47	20	2	2	0	0	0	0	GastrointestinalNoneSymptoms
642	Follow-Up	1	0	3	57	30	3	3	0	0	0	0	DryNoneMouth
643	Follow-Up	1	1	0	59	40	4	4	0	0	0	0	DryNoneMouth
644	Follow-Up	1	2	0	59	20	2	2	0	1	0	0	GastrointestinalNoneSymptoms
645	Follow-Up	1	0	4	46	30	3	3	0	0	0	0	DryNoneMouth
646	Follow-Up	1	0	1	38	20	2	2	0	0	0	0	RedNoneEyes
647	Follow-Up	1	0	2	67	20	2	2	0	0	0	0	GastrointestinalNoneSymptoms
648	Follow-Up	1	0	5	35	20	2	2	0	0	0	0	RedNoneEyes
649	Follow-Up	1	0	0	51	40	4	4	0	0	0	0
650	Follow-Up	1	0	0	68	40	4	4	0	0	0	0	DryNoneMouth
651	Follow-Up	1	0	5	44	20	2	2	0	0	0	0	GastrointestinalNoneSymptoms
652	Follow-Up	1	0	3	61	40	4	4	0	0	0	0
653	Follow-Up	1	0	0	38	20	2	2	0	0	0	0	GastrointestinalNoneSymptoms
654	Follow-Up	1	0	2	45	30	3	3	0	0	0	0	DryNoneMouth
655	Follow-Up	1	0	0	48	40	4	4	0	0	0	0	Hypotension
656	Follow-Up	1	0	5	44	20	2	2	0	0	0	0	GastrointestinalNoneSymptoms
657	Follow-Up	1	0	0	50	30	3	3	0	0	0	0	DryNoneMouth
658	Follow-Up	1	1	0	39	30	3	3	0	0	0	0	DryNoneMouth
659	Follow-Up	1	0	1	63	30	3	3	0	0	0	0	DryNoneMouth
660	Follow-Up	1	0	5	56	30	3	3	0	0	0	0	DryNoneMouth
661	Follow-Up	1	7	0	64	40	4	4	1	1	1	0	DryNoneMouth
662	Follow-Up	1	0	3	52	40	4	4	0	0	0	0	DryNoneMouth
663	Follow-Up	1	3	1	44	30	3	3	0	1	1	0	DryNoneMouth
664	Follow-Up	1	0	4	55	20	2	2	0	0	0	0	GastrointestinalNoneSymptoms
665	Follow-Up	1	5	4	45	30	3	3	1	1	1	0	DryNoneMouth
666	Follow-Up	1	0	5	52	40	4	4	0	0	0	0	DryNoneMouth
667	Follow-Up	1	0	3	54	30	3	3	0	0	0	0	DryNoneMouth
668	Follow-Up	1	0	1	69	40	4	4	0	0	0	0	Hypotension
669	Follow-Up	1	1	2	71	40	4	4	0	0	0	0	DryNoneMouth
670	Follow-Up	1	0	3	44	30	3	3	0	0	0	0	DryNoneMouth
671	Follow-Up	1	0	3	36	30	3	3	0	0	0	0	DryNoneMouth
672	Follow-Up	1	0	2	39	40	4	4	0	0	0	0	DryNoneMouth
673	Follow-Up	1	1	6	53	20	2	2	0	0	0	0	GastrointestinalNoneSymptoms
674	Follow-Up	1	0	4	50	20	2	2	0	0	0	0	RedNoneEyes
675	Follow-Up	1	0	2	62	40	4	4	0	0	0	0	Hypotension
676	Follow-Up	1	0	4	59	40	4	4	0	0	0	0
677	Follow-Up	1	0	5	57	30	3	3	0	0	0	0	DryNoneMouth
678	Follow-Up	1	0	4	72	40	4	4	0	0	0	0
679	Follow-Up	1	0	6	47	20	2	2	0	0	0	0	GastrointestinalNoneSymptoms
680	Follow-Up	1	0	6	47	20	2	2	0	0	0	0	GastrointestinalNoneSymptoms
681	Follow-Up	1	0	4	31	40	4	4	0	0	0	0
682	Follow-Up	1	0	1	64	40	4	4	0	0	0	0	Hypotension
683	Follow-Up	1	0	3	74	40	4	4	0	0	0	0	CognitiveNoneSymptoms
684	Follow-Up	1	0	0	52	20	2	2	0	0	0	0	GastrointestinalNoneSymptoms
685	Follow-Up	1	0	5	47	30	3	3	0	0	0	0	DryNoneMouth
686	Follow-Up	1	0	6	54	20	2	2	0	0	0	0	GastrointestinalNoneSymptoms
687	Follow-Up	1	0	2	61	30	3	3	0	0	0	0	DryNoneMouth
688	Follow-Up	1	0	4	46	30	3	3	0	0	0	0	DryNoneMouth
689	Follow-Up	1	0	6	46	30	3	3	0	0	0	0	DryNoneMouth
690	Follow-Up	1	0	3	55	40	4	4	0	0	0	0	DryNoneMouth
691	Follow-Up	1	0	5	66	40	4	4	0	0	0	0	DryNoneMouth
692	Follow-Up	1	0	0	49	20	2	2	0	0	0	0	GastrointestinalNoneSymptoms
693	Follow-Up	1	0	3	65	20	2	2	0	0	0	0	RedNoneEyes
694	Follow-Up	1	0	2	56	20	2	2	0	0	0	0	GastrointestinalNoneSymptoms
695	Follow-Up	1	0	6	51	40	4	4	0	0	0	0
696	Follow-Up	1	0	6	63	20	2	2	0	0	0	0	RedNoneEyes
697	Follow-Up	1	0	3	60	30	3	3	0	0	0	0	DryNoneMouth
698	Follow-Up	1	0	0	44	20	2	2	0	0	0	0	GastrointestinalNoneSymptoms
699	Follow-Up	1	0	5	31	40	4	4	0	0	0	0	DryNoneMouth
700	Follow-Up	1	0	4	67	20	2	2	0	0	0	0	GastrointestinalNoneSymptoms
701	Follow-Up	1	0	6	63	20	2	2	0	0	0	0	GastrointestinalNoneSymptoms
702	Follow-Up	1	0	1	61	20	2	2	0	0	0	0	RedNoneEyes
703	Follow-Up	1	0	0	49	20	2	2	0	0	0	0	GastrointestinalNoneSymptoms
704	Follow-Up	1	0	6	65	30	3	3	0	0	0	0	DryNoneMouth
705	Follow-Up	1	1	1	63	20	2	2	0	0	0	0	GastrointestinalNoneSymptoms
706	Follow-Up	1	0	0	66	30	3	3	0	0	0	0	DryNoneMouth
707	Follow-Up	1	0	6	58	20	2	2	0	0	0	0	GastrointestinalNoneSymptoms
708	Follow-Up	1	0	6	62	40	4	4	0	0	0	0	CognitiveNoneSymptoms
709	Follow-Up	1	0	5	59	30	3	3	0	0	0	0	DryNoneMouth
710	Follow-Up	1	0	4	57	20	2	2	0	0	0	0	RedNoneEyes
711	Follow-Up	1	0	3	57	20	2	2	0	0	0	0	GastrointestinalNoneSymptoms
712	Follow-Up	1	0	5	59	20	2	2	0	0	0	0	GastrointestinalNoneSymptoms
713	Follow-Up	1	0	4	41	40	4	4	0	0	0	0	Hypotension
714	Follow-Up	1	0	3	35	20	2	2	0	0	0	0	GastrointestinalNoneSymptoms
715	Follow-Up	1	0	5	62	40	4	4	0	0	0	0	Hypotension
716	Follow-Up	1	0	1	53	40	4	4	0	0	0	0	DryNoneMouth
717	Follow-Up	1	1	1	63	40	4	4	0	0	0	0
718	Follow-Up	1	0	2	48	40	4	4	0	0	0	0
719	Follow-Up	1	0	4	63	30	3	3	0	0	0	0	DryNoneMouth
720	Follow-Up	1	2	6	55	20	2	2	0	1	1	0	GastrointestinalNoneSymptoms
721	Follow-Up	1	0	2	49	20	2	2	0	0	0	0	GastrointestinalNoneSymptoms
722	Follow-Up	1	0	2	54	40	4	4	0	0	0	0	DryNoneMouth
723	Follow-Up	1	0	0	59	40	4	4	0	0	0	0	Hypotension
724	Follow-Up	1	0	6	60	20	2	2	0	0	0	0	GastrointestinalNoneSymptoms
725	Follow-Up	1	0	2	54	20	2	2	0	0	0	0	GastrointestinalNoneSymptoms
726	Follow-Up	1	2	5	50	30	3	3	0	1	1	0	DryNoneMouth
727	Follow-Up	1	0	3	41	40	4	4	0	0	0	0	DryNoneMouth
728	Follow-Up	1	0	1	67	30	3	3	0	0	0	0	DryNoneMouth
729	Follow-Up	1	0	0	56	20	2	2	0	0	0	0	RedNoneEyes
730	Follow-Up	1	0	0	54	30	3	3	0	0	0	0	DryNoneMouth
731	Follow-Up	1	0	4	42	40	4	4	0	0	0	0	Hypotension
732	Follow-Up	1	0	1	54	20	2	2	0	0	0	0	GastrointestinalNoneSymptoms
733	Follow-Up	1	0	3	55	30	3	3	0	0	0	0	DryNoneMouth
734	Follow-Up	1	0	1	42	40	4	4	0	0	0	0	DryNoneMouth
735	Follow-Up	1	1	0	49	40	4	4	0	0	0	0	DryNoneMouth
736	Follow-Up	1	0	3	44	30	3	3	0	0	0	0	DryNoneMouth
737	Follow-Up	1	0	2	65	30	3	3	0	0	0	0	DryNoneMouth
738	Follow-Up	1	0	1	44	30	3	3	0	0	0	0	DryNoneMouth
739	Follow-Up	1	1	1	50	40	4	4	0	0	0	0	DryNoneMouth
740	Follow-Up	1	0	4	34	40	4	4	0	0	0	0	CognitiveNoneSymptoms
741	Follow-Up	1	0	1	50	30	3	3	0	0	0	0	DryNoneMouth
742	Follow-Up	1	1	6	62	40	4	4	0	0	0	0	DryNoneMouth
743	Follow-Up	1	0	4	60	40	4	4	0	0	0	0	DryNoneMouth
744	Follow-Up	1	0	1	68	20	2	2	0	0	0	0	GastrointestinalNoneSymptoms
745	Follow-Up	1	3	3	48	40	4	4	0	1	1	0	DryNoneMouth
746	Follow-Up	1	0	3	57	30	3	3	0	0	0	0	DryNoneMouth
747	Follow-Up	1	0	5	57	40	4	4	0	0	0	0	DryNoneMouth
748	Follow-Up	1	1	2	45	20	2	2	0	0	0	0	GastrointestinalNoneSymptoms
749	Follow-Up	1	4	4	70	20	2	2	1	0	0	0
750	Follow-Up	1	0	0	57	40	4	4	0	0	0	0	DryNoneMouth
751	Follow-Up	1	2	5	49	40	4	4	0	1	1	0	DryNoneMouth
752	Follow-Up	1	2	6	59	20	2	2	0	1	1	0	GastrointestinalNoneSymptoms
753	Follow-Up	1	0	6	42	20	2	2	0	0	0	0	RedNoneEyes
754	Follow-Up	1	0	1	60	20	2	2	0	0	0	0	GastrointestinalNoneSymptoms
755	Follow-Up	1	0	4	44	20	2	2	0	0	0	0	RedNoneEyes
756	Follow-Up	1	0	2	58	20	4	0.8	0	0	0	0	GastrointestinalNoneSymptoms
757	Follow-Up	1	0	4	51	30	6	1.2	0	0	0	0	DryNoneMouth
758	Follow-Up	1	0	5	60	40	8	1.6	0	0	0	0	DryNoneMouth
759	Follow-Up	1	0	5	74	30	6	1.2	0	0	0	0	DryNoneMouth
760	Follow-Up	1	0	6	37	20	4	0.8	0	0	0	0	RedNoneEyes
761	Follow-Up	1	0	0	45	20	4	0.8	0	0	0	0	GastrointestinalNoneSymptoms
762	Follow-Up	1	0	3	64	20	4	0.8	0	0	0	0	GastrointestinalNoneSymptoms
763	Follow-Up	1	0	0	59	30	6	1.2	0	0	0	0	DryNoneMouth
764	Follow-Up	1	0	6	57	20	4	0.8	0	0	0	0	GastrointestinalNoneSymptoms
765	Follow-Up	1	0	2	73	40	8	1.6	0	0	0	0	Hypotension
766	Follow-Up	1	0	1	61	30	6	1.2	0	0	0	0	DryNoneMouth
767	Follow-Up	1	0	1	50	40	8	1.6	0	0	0	0	DryNoneMouth
768	Follow-Up	1	0	5	47	30	6	1.2	0	0	0	0	DryNoneMouth
769	Follow-Up	1	0	4	44	30	6	1.2	0	0	0	0	DryNoneMouth
770	Follow-Up	1	1	0	62	30	6	1.2	0	1	0	0	DryNoneMouth
771	Follow-Up	1	0	1	54	20	4	0.8	0	0	0	0	GastrointestinalNoneSymptoms
772	Follow-Up	1	0	3	47	20	4	0.8	0	0	0	0	GastrointestinalNoneSymptoms
773	Follow-Up	1	0	5	44	20	4	0.8	0	0	0	0	GastrointestinalNoneSymptoms
774	Follow-Up	1	0	0	42	20	4	0.8	0	0	0	0	RedNoneEyes
775	Follow-Up	1	0	5	51	40	8	1.6	0	0	0	0	DryNoneMouth
776	Follow-Up	1	0	1	62	20	4	0.8	0	0	0	0	GastrointestinalNoneSymptoms
777	Follow-Up	1	0	6	52	20	4	0.8	0	0	0	0	GastrointestinalNoneSymptoms
778	Follow-Up	1	0	0	52	20	4	0.8	0	0	0	0	RedNoneEyes
779	Follow-Up	1	0	1	40	20	4	0.8	0	0	0	0	RedNoneEyes
780	Follow-Up	1	0	4	48	30	6	1.2	0	0	0	0	DryNoneMouth
781	Follow-Up	1	0	2	66	30	3	3	0	0	0	0	DryNoneMouth
782	Follow-Up	1	1	6	48	40	4	4	0	1	1	0
783	Follow-Up	1	0	2	59	20	2	2	0	0	0	0	GastrointestinalNoneSymptoms
784	Follow-Up	1	0	1	50	40	4	4	0	0	0	0	DryNoneMouth
785	Follow-Up	1	0	3	47	30	3	3	0	0	0	0	DryNoneMouth
786	Follow-Up	1	0	3	63	30	3	3	0	0	0	0	DryNoneMouth
787	Follow-Up	1	1	3	49	30	3	3	1	1	1	0	DryNoneMouth
788	Follow-Up	1	0	0	45	40	4	4	0	0	0	0	DryNoneMouth
789	Follow-Up	1	0	2	49	40	4	4	0	0	0	0	CognitiveNoneSymptoms
790	Follow-Up	1	0	4	56	30	3	3	0	0	0	0	DryNoneMouth
791	Follow-Up	1	0	1	62	30	3	3	0	0	0	0	DryNoneMouth
792	Follow-Up	1	0	6	48	30	3	3	0	0	0	0	DryNoneMouth
793	Follow-Up	1	0	5	54	30	3	3	0	0	0	0	DryNoneMouth
794	Follow-Up	1	0	1	66	30	3	3	0	0	0	0	DryNoneMouth
795	Follow-Up	1	0	5	45	30	3	3	0	0	0	0	DryNoneMouth
796	Follow-Up	1	0	5	58	40	4	4	0	0	0	0	Hypotension
797	Follow-Up	1	0	0	49	40	4	4	0	0	0	0
798	Follow-Up	1	0	3	54	20	2	2	0	0	0	0	GastrointestinalNoneSymptoms
799	Follow-Up	1	0	1	54	20	2	2	0	0	0	0	GastrointestinalNoneSymptoms
800	Follow-Up	1	2	3	74	30	3	3	1	1	1	0	DryNoneMouth
801	Follow-Up	1	0	6	54	40	4	4	0	0	0	0	DryNoneMouth
802	Follow-Up	1	0	3	54	30	3	3	0	0	0	0	DryNoneMouth
803	Follow-Up	1	0	1	36	20	2	2	0	0	0	0	GastrointestinalNoneSymptoms
804	Follow-Up	1	0	2	60	40	4	4	0	0	0	0	DryNoneMouth
805	Follow-Up	1	2	6	50	20	2	2	1	1	1	0	GastrointestinalNoneSymptoms
806	Follow-Up	1	0	1	67	30	3	3	0	0	0	0	DryNoneMouth
807	Follow-Up	1	3	1	66	30	3	3	0	1	1	0	DryNoneMouth
808	Follow-Up	1	0	2	63	30	3	3	0	0	0	0	DryNoneMouth
809	Follow-Up	1	0	3	51	40	4	4	0	0	0	0	Hypotension
810	Follow-Up	1	0	6	62	40	4	4	0	0	0	0	DryNoneMouth
811	Follow-Up	1	1	5	46	30	3	3	1	1	1	0	DryNoneMouth
812	Follow-Up	1	0	5	51	40	4	4	0	0	0	0	Hypotension
813	Follow-Up	1	0	3	51	30	3	3	0	0	0	0	DryNoneMouth
814	Follow-Up	1	0	4	47	40	4	4	0	0	0	0
815	Follow-Up	1	2	6	61	20	2	2	1	1	1	0	GastrointestinalNoneSymptoms
816	Follow-Up	1	0	6	55	20	2	2	0	0	0	0	RedNoneEyes
817	Follow-Up	1	0	2	55	40	4	4	0	0	0	0	CognitiveNoneSymptoms
818	Follow-Up	1	0	1	69	20	2	2	0	0	0	0	GastrointestinalNoneSymptoms
819	Follow-Up	1	0	5	58	20	2	2	0	0	0	0	GastrointestinalNoneSymptoms
820	Follow-Up	1	0	3	57	30	3	3	0	0	0	0	DryNoneMouth
821	Follow-Up	1	1	0	47	40	4	4	1	1	1	0
822	Follow-Up	1	0	3	47	20	2	2	0	0	0	0	GastrointestinalNoneSymptoms
823	Follow-Up	1	0	1	67	20	2	2	0	0	0	0	RedNoneEyes
824	Follow-Up	1	0	3	60	30	3	3	0	0	0	0	DryNoneMouth
825	Follow-Up	1	0	1	71	30	3	3	0	0	0	0	DryNoneMouth
826	Follow-Up	1	0	3	70	40	4	4	0	0	0	0	DryNoneMouth
827	Follow-Up	1	0	3	47	20	2	2	0	0	0	0	GastrointestinalNoneSymptoms
828	Follow-Up	1	0	3	42	30	3	3	0	0	0	0	DryNoneMouth
829	Follow-Up	1	0	0	62	20	2	2	0	0	0	0	RedNoneEyes
830	Follow-Up	1	0	1	59	30	3	3	0	0	0	0	DryNoneMouth
831	Follow-Up	1	0	2	49	20	2	2	0	0	0	0	GastrointestinalNoneSymptoms
832	Follow-Up	1	0	1	34	20	2	2	0	0	0	0	RedNoneEyes
833	Follow-Up	1	0	5	69	20	2	2	0	0	0	0	GastrointestinalNoneSymptoms
834	Follow-Up	1	0	4	61	40	4	4	0	0	0	0	DryNoneMouth
835	Follow-Up	1	0	4	60	40	4	4	0	0	0	0	DryNoneMouth
836	Follow-Up	1	0	6	44	40	4	4	0	0	0	0	CognitiveNoneSymptoms
837	Follow-Up	1	0	0	48	30	3	3	0	0	0	0	DryNoneMouth
838	Follow-Up	1	0	2	65	20	2	2	0	0	0	0	GastrointestinalNoneSymptoms
839	Follow-Up	1	0	0	61	40	4	4	0	0	0	0
840	Follow-Up	1	1	3	64	30	3	3	1	1	1	0	DryNoneMouth
841	Follow-Up	1	0	3	56	20	2	2	0	0	0	0	GastrointestinalNoneSymptoms
842	Follow-Up	1	5	4	50	30	3	3	1	1	1	0	DryNoneMouth
843	Follow-Up	1	0	0	46	30	3	3	0	0	0	0	DryNoneMouth
844	Follow-Up	1	0	3	50	40	4	4	0	0	0	0	Hypotension
845	Follow-Up	1	0	6	42	30	3	3	0	0	0	0	DryNoneMouth
846	Follow-Up	1	0	3	50	40	4	4	0	0	0	0	Hypotension
847	Follow-Up	1	0	4	57	30	3	3	0	0	0	0	DryNoneMouth
848	Follow-Up	1	0	2	63	40	4	4	0	0	0	0	DryNoneMouth
849	Follow-Up	1	3	4	35	30	3	3	0	1	1	0	DryNoneMouth
850	Follow-Up	1	1	0	46	30	3	3	1	1	1	0	DryNoneMouth
851	Follow-Up	1	1	2	48	40	4	4	1	0	1	0	DryNoneMouth
852	Follow-Up	1	1	1	63	40	4	4	1	0	0	0
853	Follow-Up	1	0	5	40	40	4	4	0	0	0	0
854	Follow-Up	1	1	0	42	40	4	4	1	0	0	0	DryNoneMouth
855	Follow-Up	1	0	6	57	30	3	3	0	0	0	0	DryNoneMouth
856	Follow-Up	1	0	5	57	30	3	3	0	0	0	0	DryNoneMouth
857	Follow-Up	1	0	3	40	40	4	4	0	0	0	0
858	Follow-Up	1	0	6	37	30	3	3	0	0	0	0	DryNoneMouth
859	Follow-Up	1	0	1	60	30	3	3	0	0	0	0	DryNoneMouth
860	Follow-Up	1	0	2	65	40	4	4	0	0	0	0	DryNoneMouth
861	Follow-Up	1	0	5	57	20	2	2	0	0	0	0	RedNoneEyes
862	Follow-Up	1	0	1	58	40	4	4	0	0	0	0	DryNoneMouth
863	Follow-Up	1	0	5	55	20	2	2	0	0	0	0	RedNoneEyes
864	Follow-Up	1	0	1	49	30	3	3	0	0	0	0	DryNoneMouth
865	Follow-Up	1	0	1	52	30	3	3	0	0	0	0	DryNoneMouth
866	Follow-Up	1	0	2	47	30	3	3	0	0	0	0	DryNoneMouth
867	Follow-Up	1	0	5	69	40	4	4	0	0	0	0	DryNoneMouth
868	Follow-Up	1	0	4	57	20	2	2	0	0	0	0	GastrointestinalNoneSymptoms
869	Follow-Up	1	0	3	47	20	2	2	0	0	0	0	RedNoneEyes
870	Follow-Up	1	0	5	52	20	2	2	0	0	0	0	RedNoneEyes
871	Follow-Up	1	0	4	35	40	4	4	0	0	0	0	CognitiveNoneSymptoms
872	Follow-Up	1	0	2	62	30	3	3	0	0	0	0	DryNoneMouth
873	Follow-Up	1	0	5	36	20	2	2	0	0	0	0	RedNoneEyes
874	Follow-Up	1	0	4	43	40	4	4	0	0	0	0	Hypotension
875	Follow-Up	1	0	1	58	30	3	3	0	0	0	0	DryNoneMouth
876	Follow-Up	1	2	6	56	20	2	2	1	1	1	0	GastrointestinalNoneSymptoms
877	Follow-Up	1	0	2	57	20	2	2	0	0	0	0	RedNoneEyes
878	Follow-Up	1	0	6	35	40	4	4	0	0	0	0	DryNoneMouth
879	Follow-Up	1	0	0	63	20	2	2	0	0	0	0	GastrointestinalNoneSymptoms
880	Follow-Up	1	0	5	45	20	2	2	0	0	0	0	RedNoneEyes
881	Follow-Up	1	0	1	67	20	2	2	0	0	0	0	RedNoneEyes
882	Follow-Up	1	0	1	58	30	3	3	0	0	0	0	DryNoneMouth
883	Follow-Up	1	1	4	44	20	2	2	1	0	0	1	GastrointestinalNoneSymptoms
884	Follow-Up	1	0	4	53	40	4	4	0	0	0	0
885	Follow-Up	1	0	5	46	20	2	2	0	0	0	0	GastrointestinalNoneSymptoms
886	Follow-Up	1	0	0	67	20	2	2	0	0	0	0	GastrointestinalNoneSymptoms
887	Follow-Up	1	0	6	43	30	3	3	0	0	0	0	DryNoneMouth
888	Follow-Up	1	0	0	38	40	4	4	0	0	0	0	DryNoneMouth
889	Follow-Up	1	0	0	42	20	2	2	0	0	0	0	GastrointestinalNoneSymptoms
890	Follow-Up	1	0	6	48	40	4	4	0	0	0	0	DryNoneMouth
891	Follow-Up	1	0	5	55	40	4	4	0	0	0	0	DryNoneMouth
892	Follow-Up	1	0	0	50	20	2	2	0	0	0	0	GastrointestinalNoneSymptoms
893	Follow-Up	1	0	3	70	30	3	3	0	0	0	0	DryNoneMouth
894	Follow-Up	1	0	5	50	30	3	3	0	0	0	0	DryNoneMouth
895	Follow-Up	1	0	4	47	30	3	3	0	0	0	0	DryNoneMouth
896	Follow-Up	1	0	6	44	20	2	2	0	0	0	0	GastrointestinalNoneSymptoms
897	Follow-Up	1	0	4	70	40	4	4	0	0	0	0	Hypotension
898	Follow-Up	1	0	1	51	40	4	4	0	0	0	0	DryNoneMouth
899	Follow-Up	1	0	0	64	30	3	3	0	0	0	0	DryNoneMouth
900	Follow-Up	1	0	0	41	30	3	3	0	0	0	0	DryNoneMouth
901	Follow-Up	1	0	4	49	40	4	4	0	0	0	0	DryNoneMouth
902	Follow-Up	1	0	2	64	20	2	2	0	0	0	0	RedNoneEyes
903	Follow-Up	1	0	3	68	20	2	2	0	0	0	0	RedNoneEyes
904	Follow-Up	1	1	4	60	30	3	3	1	0	0	0	DryNoneMouth
905	Follow-Up	1	0	5	44	30	3	3	0	0	0	0	DryNoneMouth
906	Follow-Up	1	0	3	66	20	2	2	0	0	0	0	GastrointestinalNoneSymptoms
907	Follow-Up	1	1	6	46	30	3	3	0	0	0	0	DryNoneMouth
908	Follow-Up	1	0	6	62	30	3	3	0	0	0	0	DryNoneMouth
909	Follow-Up	1	0	4	60	40	4	4	0	0	0	0	DryNoneMouth
910	Follow-Up	1	0	4	53	40	8	1.6	0	0	0	0
911	Follow-Up	1	0	3	66	30	6	1.2	0	0	0	0	DryNoneMouth
912	Follow-Up	1	0	0	50	20	4	0.8	0	0	0	0	RedNoneEyes
913	Follow-Up	1	0	3	70	20	4	0.8	0	0	0	0	RedNoneEyes
914	Follow-Up	1	0	4	39	20	4	0.8	0	0	0	0	GastrointestinalNoneSymptoms
915	Follow-Up	1	0	6	73	30	6	1.2	0	0	0	0	DryNoneMouth
916	Follow-Up	1	5	4	53	30	6	1.2	1	1	1	0	DryNoneMouth
917	Follow-Up	1	1	6	54	40	8	1.6	0	0	0	0	DryNoneMouth
918	Follow-Up	1	0	6	65	20	4	0.8	0	0	0	0	RedNoneEyes
919	Follow-Up	1	2	5	37	40	4	4	1	1	1	0	DryNoneMouth
920	Follow-Up	1	0	6	64	40	4	4	0	0	0	0	DryNoneMouth
921	Follow-Up	1	0	2	62	40	4	4	0	0	0	0
922	Follow-Up	1	0	6	66	40	4	4	0	0	0	0	DryNoneMouth
923	Follow-Up	1	0	1	40	40	8	1.6	0	0	0	0	DryNoneMouth
924	Follow-Up	1	0	6	35	30	3	3	0	0	0	0	DryNoneMouth
925	Follow-Up	1	0	5	39	30	3	3	0	0	0	0	DryNoneMouth
926	Follow-Up	1	0	3	56	20	2	2	0	0	0	0	GastrointestinalNoneSymptoms
927	Follow-Up	1	0	0	58	40	4	4	0	0	0	0	DryNoneMouth
928	Follow-Up	1	0	1	69	20	2	2	0	0	0	0	GastrointestinalNoneSymptoms
929	Follow-Up	1	0	1	25	20	2	2	0	0	0	0	RedNoneEyes
930	Follow-Up	1	0	1	53	20	2	2	0	0	0	0	RedNoneEyes
931	Follow-Up	1	0	1	25	20	2	2	0	0	0	0	RedNoneEyes
932	Follow-Up	1	21	5	45	20	2	2	1	1	1	1	RedNoneEyes
933	Follow-Up	1	0	1	52	20	2	2	0	0	0	0	RedNoneEyes
934	Follow-Up	1	0	1	29	20	2	2	0	0	0	0	RedNoneEyes
935	Follow-Up	1	0	1	31	20	2	2	0	0	0	0	RedNoneEyes
936	Follow-Up	1	0	1	33	20	2	2	0	0	0	0	RedNoneEyes
937	Follow-Up	1	7	3	38	20	2	2	1	0	1	0	RedNoneEyes
938	Follow-Up	1	0	1	35	20	2	2	0	0	0	0	RedNoneEyes
939	Follow-Up	1	7	1	51	20	2	2	1	0	0	0	RedNoneEyes
940	Follow-Up	1	0	1	35	20	2	2	0	0	0	0	RedNoneEyes
941	Follow-Up	1	0	1	35	20	2	2	0	0	0	0	RedNoneEyes
942	Follow-Up	1	0	1	44	20	2	2	0	0	0	0	RedNoneEyes
943	Follow-Up	1	0	1	39	20	2	2	0	0	0	0	RedNoneEyes
944	Follow-Up	1	0	1	43	20	2	2	0	0	0	0	RedNoneEyes
945	Follow-Up	1	7	6	37	20	2	2	1	0	0	0	RedNoneEyes
946	Follow-Up	1	0	1	53	20	2	2	0	0	0	0	RedNoneEyes
947	Follow-Up	1	7	1	38	20	2	2	1	0	0	1	RedNoneEyes
948	Follow-Up	1	0	1	39	20	2	2	0	0	0	0	RedNoneEyes
949	Follow-Up	1	0	1	45	20	2	2	0	0	0	0	RedNoneEyes
950	Follow-Up	1	7	1	52	20	2	2	1	0	0	0	RedNoneEyes
951	Follow-Up	1	7	1	52	20	2	2	0	0	0	0	RedNoneEyes
952	Follow-Up	1	7	1	44	20	2	2	0	0	0	0	RedNoneEyes
953	Follow-Up	1	0	1	56	20	2	2	0	0	0	0	RedNoneEyes
954	Follow-Up	1	0	1	42	20	2	2	0	0	0	0	RedNoneEyes
955	Follow-Up	1	0	1	55	20	2	2	0	0	0	0	RedNoneEyes
956	Follow-Up	1	0	1	45	20	2	2	0	0	0	0	RedNoneEyes
957	Follow-Up	1	0	1	55	20	2	2	0	0	0	0	RedNoneEyes
958	Follow-Up	1	0	1	41	20	2	2	0	0	0	0	RedNoneEyes
959	Follow-Up	1	0	1	35	20	2	2	0	0	0	0	RedNoneEyes
960	Follow-Up	1	0	1	46	20	2	2	0	0	0	0	RedNoneEyes
961	Follow-Up	1	0	1	41	20	2	2	0	0	0	0	RedNoneEyes
962	Follow-Up	1	0	1	56	20	2	2	0	0	0	0	RedNoneEyes
963	Follow-Up	1	0	1	42	20	2	2	0	0	0	0	RedNoneEyes
964	Follow-Up	1	0	1	47	30	3	3	0	0	0	0	RedNoneEyes
965	Follow-Up	1	0	1	51	20	2	2	0	0	0	0	RedNoneEyes
966	Follow-Up	1	0	1	47	30	3	3	0	0	0	0	Inefficient
967	Follow-Up	1	14	6	43	30	3	3	1	1	1	0	Inefficient
968	Follow-Up	1	0	1	55	20	2	2	0	0	0	0	Inefficient
969	Follow-Up	1	0	1	46	20	2	2	0	0	0	0	Inefficient
970	Follow-Up	1	0	1	36	20	2	2	0	0	0	0	Inefficient
971	Follow-Up	1	0	1	37	20	2	2	0	0	0	0	Inefficient
972	Follow-Up	1	0	1	42	30	3	3	0	0	0	0	Inefficient
973	Follow-Up	1	14	1	41	20	2	2	1	1	1	0	Inefficient
974	Follow-Up	1	0	1	36	20	2	2	0	0	0	0	Inefficient
975	Follow-Up	1	0	1	44	20	2	2	0	0	0	0	Inefficient
976	Follow-Up	1	0	1	34	20	2	2	0	0	0	0	Inefficient
977	Follow-Up	1	0	1	39	20	2	2	0	0	0	0	Inefficient
978	Follow-Up	1	0	1	39	20	2	2	0	0	0	0	Inefficient
979	Follow-Up	1	0	1	34	20	2	2	0	0	0	0	Inefficient
980	Follow-Up	1	0	1	36	30	3	3	0	0	0	0	Inefficient
981	Follow-Up	1	0	1	39	20	2	2	0	0	0	0	Inefficient
982	Follow-Up	1	14	5	48	20	2	2	1	1	1	0	Inefficient
983	Follow-Up	1	0	1	35	20	2	2	0	0	0	0	Inefficient
984	Follow-Up	1	0	1	48	20	2	2	0	0	0	0	Inefficient
985	Follow-Up	1	0	1	44	20	2	2	0	0	0	0	Inefficient
986	Follow-Up	1	0	1	39	20	2	2	0	0	0	0	Inefficient
987	Follow-Up	1	0	1	45	20	2	2	0	0	0	0	Inefficient
988	Follow-Up	1	0	1	41	20	2	2	0	0	0	0	Inefficient
989	Follow-Up	1	0	1	35	20	2	2	0	0	0	0	Inefficient
990	Follow-Up	1	0	1	54	30	3	3	0	0	0	0	Inefficient
991	Follow-Up	1	0	1	42	20	2	2	0	0	0	0	Inefficient
992	Follow-Up	1	0	1	52	20	2	2	0	0	0	0	Inefficient
993	Follow-Up	1	0	1	45	20	2	2	0	0	0	0	Inefficient
994	Follow-Up	1	0	1	36	20	2	2	0	0	0	0	Inefficient
995	Follow-Up	1	0	1	40	20	2	2	0	0	0	0	Inefficient
996	Follow-Up	1	14	5	57	20	2	2	1	1	1	0	Inefficient
997	Follow-Up	1	0	0	46	20	2	2	0	0	0	0	Inefficient
998	Follow-Up	1	0	0	41	20	2	2	0	0	0	0	Inefficient
999	Follow-Up	1	0	0	33	20	2	2	0	0	0	0	Inefficient
[truncated: 7,090 more rows]

## Sheet: Summary_by_Year
Year	N	Retention%	MMEQ_mean	MMEQ_sd	NRS_mean	NRS_sd	ODI_mean	ODI_sd
0	1000	100	59.6	36.4	8.64	1.2	52.7	11.7
1	1000	100	3.1	8	3.11	2.18	51.8	12.7
2	928	92.8	3.3	8.3	2.62	2.18	51.2	13.5
3	918	91.8	3	7.8	2.06	2.13	50.1	13.5
4	870	87	3.1	7.9	2.08	2.13	50	13.7
5	825	82.5	7.3	8.1	2.14	2.07	50.5	13.9
6	785	78.5	7	8	1.97	2.02	51	14.2
7	745	74.5	6.7	7.8	1.79	1.99	47.2	14.5
8	708	70.8	6.5	7.6	1.66	1.88	43.8	14.6
9	672	67.2	6.4	7.2	1.5	1.76	40.3	14.7
10	638	63.8	6.4	7.1	1.37	1.71	36.8	14.9

## Sheet: Paired_Completers
Subject_ID	MMEQ_BL	NRS_BL	ODI_BL	SSRI_BL	Benzodiazepines_BL	μ‑opioid + SNRI‑like_BL	GABAergic antiepileptics_BL	MMEQ_Y10	NRS_Y10	ODI_Y10	SSRI_Y10	Benzodiazepines_Y10	μ‑opioid + SNRI‑like_Y10	GABAergic antiepileptics_Y10	MMEQ_Change	NRS_Change	ODI_Change	MMEQ_MCID	NRS_MCID	ODI_MCID
1	30	7	37	1	1	1	1	0	3	17	0	0	0	0	-30	-4	-20	True	True	True
2	7	7	60	0	0	0	0	4	4	45	1	1	1	0	-3	-3	-15	False	True	True
4	14	9	36	0	0	0	0	3	1	47	0	0	0	0	-11	-8	11	True	True	False
5	66	9	49	0	1	1	0	30	4	36	1	1	1	0	-36	-5	-13	True	True	True
7	105	9	56	1	1	1	1	6	0	57	0	0	0	0	-99	-9	1	True	True	False
9	72	7	56	0	0	1	0	0	1	31	1	1	1	0	-72	-6	-25	True	True	True
10	108	9	65	1	1	1	0	44	0	40	0	0	0	0	-64	-9	-25	True	True	True
12	24	8	35	1	1	1	1	30	0	15	0	0	0	0	6	-8	-20	False	True	True
13	8	9	60	1	1	1	0	5	0	43	0	0	0	0	-3	-9	-17	False	True	True
14	117	9	37	1	1	1	0	34	1	35	1	1	1	0	-83	-8	-2	True	True	False
15	90	10	67	1	1	1	0	4	6	54	0	0	0	0	-86	-4	-13	True	True	True
16	42	8	82	1	1	1	1	2	1	68	0	0	0	0	-40	-7	-14	True	True	True
17	15	9	74	0	0	0	0	20	1	65	1	1	1	0	5	-8	-9	False	True	False
18	121	9	46	1	1	1	0	17	4	20	0	0	0	0	-104	-5	-26	True	True	True
19	96	10	77	1	1	1	0	4	1	78	0	0	0	0	-92	-9	1	True	True	False
20	12	6	73	0	1	0	0	0	1	23	0	0	0	0	-12	-5	-50	True	True	True
21	77	7	43	1	0	1	1	5	4	28	0	0	0	0	-72	-3	-15	True	True	True
22	162	9	63	1	1	1	0	25	1	45	1	0	1	0	-137	-8	-18	True	True	True
23	15	10	57	0	0	1	0	4	0	28	1	0	0	0	-11	-10	-29	True	True	True
25	20	9	63	0	0	0	0	2	3	64	1	0	0	0	-18	-6	1	True	True	False
27	154	10	53	1	1	1	1	32	6	41	0	0	0	0	-122	-4	-12	True	True	True
28	56	6	82	1	1	1	1	1	4	31	1	0	0	0	-55	-2	-51	True	True	True
29	28	9	79	0	1	1	0	4	7	57	0	0	0	0	-24	-2	-22	True	False	True
33	105	7	74	1	1	1	1	4	5	64	0	0	0	0	-101	-2	-10	True	False	True
35	72	10	73	0	0	1	0	23	1	54	0	0	0	0	-49	-9	-19	True	True	True
36	108	10	76	1	1	1	1	4	6	72	1	0	0	1	-104	-4	-4	True	True	False
37	80	9	63	1	0	1	0	4	2	65	0	0	0	0	-76	-7	2	True	True	False
38	24	9	72	1	1	1	1	19	3	50	0	0	0	0	-5	-6	-22	False	True	True
39	8	9	36	1	1	1	0	4	0	22	0	0	0	0	-4	-9	-14	True	True	True
41	90	9	63	1	1	1	0	3	1	12	0	0	0	0	-87	-8	-51	True	True	True
42	42	10	68	1	1	1	1	10	1	41	0	0	0	0	-32	-9	-27	True	True	True
43	15	9	68	1	0	0	0	4	0	36	0	0	0	0	-11	-9	-32	True	True	True
44	121	10	51	1	1	1	0	9	10	44	1	0	0	0	-112	0	-7	True	False	False
46	12	4	41	0	1	0	0	23	3	24	1	0	0	0	11	-1	-17	False	False	True
47	77	10	54	1	0	1	0	10	1	32	0	0	0	0	-67	-9	-22	True	True	True
48	162	9	56	1	1	1	0	3	8	24	0	0	0	0	-159	-1	-32	True	False	True
49	15	9	57	0	0	0	0	25	4	37	0	0	0	0	10	-5	-20	False	True	True
51	20	9	79	0	0	0	0	6	10	47	0	0	0	0	-14	1	-32	True	False	True
52	66	10	38	0	1	1	0	6	0	19	0	0	0	0	-60	-10	-19	True	True	True
53	108	6	48	1	1	1	0	25	1	83	0	0	0	0	-83	-5	35	True	True	False
54	14	9	65	0	0	0	0	4	2	53	0	0	0	0	-10	-7	-12	True	True	True
57	18	6	54	1	0	1	1	15	1	29	0	0	0	0	-3	-5	-25	False	True	True
58	128	7	36	1	1	1	1	4	2	45	0	0	0	0	-124	-5	9	True	True	False
59	51	5	77	1	1	1	0	12	6	43	0	0	0	0	-39	1	-34	True	False	True
62	90	7	65	1	1	1	0	4	1	39	0	1	0	0	-86	-6	-26	True	True	True
63	28	9	46	1	1	1	0	4	0	22	0	0	0	0	-24	-9	-24	True	True	True
65	36	9	43	1	1	1	1	4	0	16	0	0	0	0	-32	-9	-27	True	True	True
69	120	7	41	1	1	1	0	4	1	37	0	0	0	0	-116	-6	-4	True	True	False
70	154	9	58	1	1	1	1	17	7	51	0	0	0	0	-137	-2	-7	True	False	False
72	28	7	68	0	0	1	0	4	8	18	0	0	0	0	-24	1	-50	True	False	True
74	66	9	55	0	1	1	0	3	4		0	0	0	0	-63	-5		True	True	False
75	28	7	79	1	1	1	0	1	2		0	0	0	0	-27	-5		True	True	False
76	105	8	72	1	1	1	0	4	1		0	0	0	0	-101	-7		True	True	False
81	24	9	42	1	1	1	0	8	0	46	0	0	0	0	-16	-9	4	True	True	False
84	90	9	42	1	1	1	0	32	1	36	0	0	0	0	-58	-8	-6	True	True	False
86	15	10	81	0	0	0	0	0	1	25	0	0	0	0	-15	-9	-56	True	True	True
88	96	7	81	1	1	1	0	5	1	28	0	0	0	0	-91	-6	-53	True	True	True
89	12	10	50	0	1	0	0	5	2	23	0	0	0	0	-7	-8	-27	True	True	True
90	77	9	41	1	0	1	0	21	2	19	0	0	0	0	-56	-7	-22	True	True	True
91	162	7	63	1	1	1	1	1	1	24	0	0	0	0	-161	-6	-39	True	True	True
92	15	10	54	0	0	0	0	14	6	30	0	0	0	0	-1	-4	-24	False	True	True
93	72	9	61	0	1	1	0	4	0	27	0	0	0	0	-68	-9	-34	True	True	True
94	20	7	66	0	0	0	0	7	8	25	1	1	1	0	-13	1	-41	True	False	True
95	66	9	68	0	1	1	1	14	2	17	1	1	1	0	-52	-7	-51	True	True	True
96	108	8	55	1	1	1	0	14	2	17	0	0	0	0	-94	-6	-38	True	True	True
99	54	8	56	1	1	1	1	29	0	29	0	0	0	0	-25	-8	-27	False	True	True
100	18	9	70	1	1	1	1	9	4	27	0	0	0	0	-9	-5	-43	True	True	True
101	128	9	73	1	1	1	0	5	3	37	0	0	0	0	-123	-6	-36	True	True	True
103	40	9	60	1	0	1	1	6	1	49	0	0	0	0	-34	-8	-11	True	True	True
104	200	10	45	1	1	1	1	6	3	25	0	0	0	0	-194	-7	-20	True	True	True
105	90	9	70	1	1	1	1	26	4	69	0	0	0	0	-64	-5	-1	True	True	False
106	28	9	57	1	0	1	0	41	6	68	0	0	0	0	13	-3	11	False	True	False
107	176	8	44	1	1	1	1	38	1	19	0	0	0	0	-138	-7	-25	True	True	True
109	42	8	38	1	1	1	1	47	2	28	0	0	0	0	5	-6	-10	False	True	True
112	120	10	48	1	1	1	0	22	5	16	0	0	0	0	-98	-5	-32	True	True	True
113	38	7	67	1	1	1	1	4	4	43	1	1	1	0	-34	-3	-24	True	True	True
114	130	7	47	1	1	1	1	4	5	33	0	0	0	0	-126	-2	-14	True	False	True
115	10	9	46	0	0	0	0	9	3	40	0	1	1	0	-1	-6	-6	False	True	False
116	144	9	40	1	1	1	1	4	2	29	0	0	0	0	-140	-7	-11	True	True	True
117	35	9	53	1	1	1	1	4	6	15	0	0	0	0	-31	-3	-38	True	True	True
118	27	9	73	1	1	1	1	7	1	15	0	0	0	0	-20	-8	-58	True	True	True
120	7	9	57	0	0	0	0	19	2	17	0	0	0	0	12	-7	-40	False	True	True
122	7	7	75	0	0	0	0	10	1	9	0	0	0	0	3	-6	-66	False	True	True
123	30	10	71	0	1	1	1	8	1	10	0	0	0	0	-22	-9	-61	True	True	True
124	7	10	36	0	0	0	0	1	1	32	0	0	0	0	-6	-9	-4	True	True	False
125	30	9	48	1	1	1	1	4	1	44	0	0	0	0	-26	-8	-4	True	True	False
126	7	8	59	0	0	0	0	18	4	45	0	0	0	0	11	-4	-14	False	True	True
127	30	9	80	0	1	0	0	35	0	29	0	0	0	0	5	-9	-51	False	True	True
128	60	10	36	1	1	1	0	11	0	34	0	1	1	0	-49	-10	-2	True	True	False
129	130	9	57	1	1	1	1	21	1	16	0	0	0	0	-109	-8	-41	True	True	True
130	10	7	56	0	0	0	0		0		1	0	0	0		-7		False	True	False
131	144	9	35	1	1	1	1	9	5	62	1	1	1	0	-135	-4	27	True	True	False
132	35	7	61	1	1	1	0	15	1	14	0	0	0	0	-20	-6	-47	True	True	True
133	27	10	44	1	1	1	1	4	4	26	0	0	0	0	-23	-6	-18	True	True	True
135	7	10	70	0	1	0	0	4	0	68	0	0	0	0	-3	-10	-2	False	True	False
136	97	5	68	1	1	1	1	11	6	12	0	0	0	0	-86	1	-56	True	False	True
139	56	7	38	1	1	1	1	2	4		0	1	1	0	-54	-3		True	True	False
141	52	9	56	1	1	1	0	4	0	15	1	1	1	0	-48	-9	-41	True	True	True
143	87	10	80	1	1	1	0	7	3	43	0	1	1	0	-80	-7	-37	True	True	True
144	116	10	54	1	1	1	0	40	1	50	0	0	0	0	-76	-9	-4	True	True	False
145	98	7	44	1	1	1	1	2	1		0	0	0	0	-96	-6		True	True	False
146	54	10	40	1	1	1	1	5	1		0	1	0	0	-49	-9		True	True	False
147	112	10	35	1	1	1	1	0	0		0	0	0	0	-112	-10		True	True	False
148	87	10	59	1	1	1	1	4	2	29	0	0	0	0	-83	-8	-30	True	True	True
150	8	9	52	1	1	1	0	11	0	77	0	1	1	0	3	-9	25	False	True	False
151	40	10	68	1	1	1	1	12	1	70	0	0	0	0	-28	-9	2	True	True	False
152	26	5	58	0	1	1	0	4	1		0	0	0	0	-22	-4		True	True	False
153	89	5	67	1	1	1	0	25	1	35	0	0	0	0	-64	-4	-32	True	True	True
154	33	7	77	1	1	0	1	10	7	33	0	0	0	0	-23	0	-44	True	False	True
155	90	10	68	1	1	1	0	6	0		0	0	0	0	-84	-10		True	True	False
157	21	9	45	1	1	1	0	22	0	42	1	0	0	0	1	-9	-3	False	True	False
158	10	8	67	0	1	0	0	5	6	45	0	0	0	0	-5	-2	-22	True	False	True
160	62	10	32	1	1	1	0	4	2	9	1	1	1	0	-58	-8	-23	True	True	True
161	34	6	80	1	1	1	1	4	6	57	1	1	1	0	-30	0	-23	True	False	True
162	16	5	43	1	1	0	1	5	3	66	0	0	0	0	-11	-2	23	True	True	False
163	48	6	64	1	1	1	0	2	1	34	1	1	1	0	-46	-5	-30	True	True	True
164	51	7	38	1	1	1	0	6	2	33	0	0	0	0	-45	-5	-5	True	True	False
165	46	7	54	1	1	1	0	39	2	21	1	1	1	0	-7	-5	-33	False	True	True
167	30	5	36	1	1	1	1	1	0	40	1	0	1	0	-29	-5	4	True	True	False
168	78	8	59	1	0	1	0	5	0	13	0	0	0	0	-73	-8	-46	True	True	True
170	85	6	38	1	1	1	0		1		0	1	0	0		-5		False	True	False
171	60	5	27	1	1	1	0		0		0	0	0	0		-5		False	True	False
172	90	9	22	1	1	1	0		1		0	0	0	0		-8		False	True	False
173	66	6	46	0	1	1	0		0		0	0	0	0		-6		False	True	False
174	77	7	41	1	0	1	0		1		1	0	0	0		-6		False	True	False
176	39	8	30	1	1	1	1		1		0	0	0	0		-7		False	True	False
177	99	7	84	1	1	1	0	9	2	17	1	1	1	0	-90	-5	-67	True	True	True
178	81	6	58	1	0	1	0	3	1	30	0	0	0	0	-78	-5	-28	True	True	True
179	14	5	30	0	0	0	0	47	4	18	1	0	0	1	33	-1	-12	False	False	True
180	18	7	41	1	1	0	0	22	0	47	0	0	0	0	4	-7	6	False	True	False
181	41	10	67	0	1	0	1	4	5	15	0	0	0	0	-37	-5	-52	True	True	True
182	22	5	31	1	1	1	1	22	2	46	0	0	0	0	0	-3	15	False	True	False
183	49	6	25	1	1	1	1	10	0	62	0	0	0	0	-39	-6	37	True	True	False
184	32	6	42	1	1	1	1	11	1	16	0	0	0	0	-21	-5	-26	True	True	True
185	109	10	38	1	1	1	1	2	3	12	0	0	0	0	-107	-7	-26	True	True	True
186	111	10	55	1	1	1	0	4	0	13	0	0	0	0	-107	-10	-42	True	True	True
187	24	5	67	1	1	1	0	10	0	12	0	0	0	0	-14	-5	-55	True	True	True
188	10	8	27	0	1	1	0	7	0	24	0	0	1	0	-3	-8	-3	False	True	False
189	67	5	44	0	0	1	0	2	9	68	0	0	0	0	-65	4	24	True	False	False
190	44	10	77	0	1	1	0	4	10	55	0	0	0	0	-40	0	-22	True	False	True
191	116	10	36	1	1	1	0	4	3	10	0	1	0	0	-112	-7	-26	True	True	True
192	57	7	57	1	1	1	1	6	2	25	1	0	1	0	-51	-5	-32	True	True	True
194	50	10	41	1	1	1	0	11	1	74	0	0	0	0	-39	-9	33	True	True	False
195	13	8	21	1	1	1	0	12	0	8	0	0	1	0	-1	-8	-13	False	True	True
196	99	8	43	1	1	1	0	7	2	35	0	0	0	0	-92	-6	-8	True	True	False
198	112	6	76	1	1	1	0	18	1	47	0	1	1	0	-94	-5	-29	True	True	True
201	118	7	66	1	1	1	0	8	2	24	0	0	0	0	-110	-5	-42	True	True	True
202	90	7	26	1	1	1	0	30	2	27	0	0	0	0	-60	-5	1	True	True	False
203	93	8	69	1	1	1	1	17	1	11	0	0	0	0	-76	-7	-58	True	True	True
204	12	8	43	1	1	1	0	4	1	34	0	0	0	0	-8	-7	-9	True	True	False
206	96	6	42	1	1	1	0	23	0	14	0	0	0	0	-73	-6	-28	True	True	True
207	113	9	84	1	1	1	1	15	1	41	1	1	1	0	-98	-8	-43	True	True	True
208	46	8	66	1	1	1	1	21	2	17	0	0	0	0	-25	-6	-49	True	True	True
215	100	6	61	1	1	1	0	5	4	20	0	0	0	0	-95	-2	-41	True	True	True
217	49	8	35	1	1	1	1	4	2	39	0	0	0	0	-45	-6	4	True	True	False
218	61	10	27	1	1	1	0	3	1	29	0	0	0	0	-58	-9	2	True	True	False
220	82	8	77	1	1	1	0	46	0	15	1	1	1	0	-36	-8	-62	False	True	True
221	73	8	30	0	0	1	0	11	0	54	0	0	0	0	-62	-8	24	True	True	False
222	63	10	61	0	1	1	0	4	0	15	0	0	0	0	-59	-10	-46	True	True	True
223	46	5	32	0	0	1	0	38	3	19	0	0	0	0	-8	-2	-13	False	True	True
224	23	5	34	1	1	1	0	37	1	19	1	1	1	0	14	-4	-15	False	True	True
225	47	5	62	1	1	1	0	4	2	54	0	0	0	0	-43	-3	-8	True	True	False
226	64	7	64	1	1	1	0	4	1	19	0	0	0	0	-60	-6	-45	True	True	True
227	97	9	45	1	1	1	1	30	1	14	0	0	0	0	-67	-8	-31	True	True	True
229	44	5	80	1	1	0	0	5	1	69	0	0	0	0	-39	-4	-11	True	True	True
230	74	7	65	0	0	1	0	4	0	60	0	0	0	0	-70	-7	-5	True	True	False
231	21	10	72	1	1	1	1	7	1	33	0	0	1	0	-14	-9	-39	True	True	True
233	10	10	24	0	1	1	0	10	0	28	1	1	1	0	0	-10	4	False	True	False
234	113	6	23	1	1	1	0	6	7	65	0	0	0	0	-107	1	42	True	False	False
235	56	10	59	1	1	1	1	21	1	28	0	0	0	0	-35	-9	-31	True	True	True
237	57	7	76	1	1	1	0	21	4	27	0	0	0	0	-36	-3	-49	True	True	True
238	40	6	43	0	1	1	1	13	1	33	0	0	0	0	-27	-5	-10	True	True	True
239	67	9	38	0	0	1	0	4	4	64	0	0	0	0	-63	-5	26	True	True	False
241	31	10	26	1	1	1	0	12	0	40	0	0	0	0	-19	-10	14	True	True	False
242	88	7	54	1	1	1	1	4	0	51	1	1	1	0	-84	-7	-3	True	True	False
244	97	7	76	1	1	1	0	10	2	10	1	1	0	1	-87	-5	-66	True	True	True
245	19	9	63	0	1	0	0	16	0	66	1	1	1	0	-3	-9	3	False	True	False
247	94	9	36	1	1	1	0	10	1	52	0	0	0	0	-84	-8	16	True	True	False
248	7	9	38	0	1	1	0	10	3	15	0	1	1	0	3	-6	-23	False	True	True
250	46	7	68	1	1	1	0	4	1	52	1	0	1	0	-42	-6	-16	True	True	True
251	117	9	68	1	1	1	0	36	0	10	1	1	1	1	-81	-9	-58	True	True	True
253	94	8	43	1	1	1	1	1	0	45	0	0	0	0	-93	-8	2	True	True	False
254	74	9	41	0	0	1	0	0	2	26	0	0	0	0	-74	-7	-15	True	True	True
255	82	9	54	1	1	1	0	10	0	43	0	0	0	0	-72	-9	-11	True	True	True
257	44	8	57	1	1	1	0	4	0	54	0	0	0	0	-40	-8	-3	True	True	False
258	41	9	52	1	1	1	1	15	1	26	0	0	0	0	-26	-8	-26	True	True	True
259	107	9	79	1	1	1	1	4	1	40	0	0	0	0	-103	-8	-39	True	True	True
260	22	10	38	1	1	1	0	4	1	28	0	0	0	0	-18	-9	-10	True	True	True
263	58	9	60	1	1	1	0	6	0	42	0	0	0	0	-52	-9	-18	True	True	True
264	37	10	38	1	0	1	1	11	0	23	0	0	0	0	-26	-10	-15	True	True	True
265	78	9	54	1	0	1	0	4	1	48	0	0	0	0	-74	-8	-6	True	True	False
266	83	9	36	1	1	1	0	4	1	46	0	0	0	0	-79	-8	10	True	True	False
269	17	6	52	0	0	0	1	5	1	43	0	0	0	0	-12	-5	-9	True	True	False
270	44	10	65	1	1	1	0	4	1	52	0	0	0	0	-40	-9	-13	True	True	True
271	90	9	46	1	1	1	1	0	0	38	0	0	0	0	-90	-9	-8	True	True	False
272	118	9	50	1	1	1	0	4	1	28	0	0	0	0	-114	-8	-22	True	True	True
273	7	10	43	0	1	1	0	5	3	58	0	0	0	0	-2	-7	15	False	True	False
274	10	7	35	0	1	1	0	4	2	68	0	0	0	0	-6	-5	33	True	True	False
275	118	7	37	1	1	1	0	4	0	39	0	0	0	0	-114	-7	2	True	True	False
276	72	10	41	0	0	1	0	4	4	27	0	0	0	0	-68	-6	-14	True	True	True
278	29	9	58	1	0	1	1	10	1	26	0	0	0	0	-19	-8	-32	True	True	True
279	105	9	65	1	1	1	0	5	1	31	0	0	0	0	-100	-8	-34	True	True	True
280	107	9	68	1	1	1	0	5	1	53	0	0	0	0	-102	-8	-15	True	True	True
281	28	7	82	1	0	1	1	4	1	25	0	0	0	0	-24	-6	-57	True	True	True
284	103	9	72	1	1	1	1	5	2	43	0	0	0	0	-98	-7	-29	True	True	True
285	101	10	37	1	1	1	1	5	1	38	0	0	0	0	-96	-9	1	True	True	False
286	28	10	49	0	1	0	1	1	1	45	0	0	0	0	-27	-9	-4	True	True	False
287	37	4	65	1	1	1	1	4	1	40	0	0	0	0	-33	-3	-25	True	True	True
289	80	8	42	1	0	1	0	4	0	49	0	0	0	0	-76	-8	7	True	True	False
290	77	9	52	1	0	1	0	4	2	46	0	0	0	0	-73	-7	-6	True	True	False
291	43	10	54	1	1	0	1	10	1	39	0	0	0	0	-33	-9	-15	True	True	True
293	55	10	55	1	1	1	1	4	1	48	0	0	0	0	-51	-9	-7	True	True	False
295	34	9	73	0	1	1	1	4	3	10	0	0	0	0	-30	-6	-63	True	True	True
297	89	10	50	1	1	1	0	5	8	34	0	0	0	0	-84	-2	-16	True	False	True
299	50	7	63	1	1	1	0	1	0	37	0	0	0	0	-49	-7	-26	True	True	True
303	92	7	68	1	1	1	0	4	6	39	0	0	0	0	-88	-1	-29	True	False	True
305	8	10	75	1	1	1	1	10	1	62	0	0	0	0	2	-9	-13	False	True	True
306	70	9	67	0	1	1	0	4	0	44	0	0	0	0	-66	-9	-23	True	True	True
308	105	7	70	1	1	1	0	4	2	50	0	0	0	0	-101	-5	-20	True	True	True
309	106	9	73	1	1	1	0	4	0	15	0	0	0	0	-102	-9	-58	True	True	True
310	13	7	36	1	1	1	0	3	1	46	0	0	0	0	-10	-6	10	True	True	False
312	48	9	45	1	1	1	0	2	1	40	0	0	0	0	-46	-8	-5	True	True	False
315	85	9	44	1	1	1	0	5	0	21	0	0	0	0	-80	-9	-23	True	True	True
317	44	8	38	1	1	1	0	1	1	39	0	0	0	0	-43	-7	1	True	True	False
319	56	9	71	1	1	1	1	4	0	63	0	0	0	0	-52	-9	-8	True	True	False
320	68	9	48	0	0	1	1	4	1	46	0	0	0	0	-64	-8	-2	True	True	False
322	38	9	47	0	1	1	0	5	1	46	0	0	0	0	-33	-8	-1	True	True	False
323	50	9	46	1	1	1	0	3	1	22	0	0	0	0	-47	-8	-24	True	True	True
324	68	5	40	0	0	1	1	5	3	48	0	0	0	0	-63	-2	8	True	True	False
326	32	9	73	1	1	1	1	4	0	44	0	0	0	0	-28	-9	-29	True	True	True
327	91	10	40	1	1	1	1	3	0	13	0	0	0	0	-88	-10	-27	True	True	True
329	42	7	58	1	0	1	1	2	1	54	0	0	0	0	-40	-6	-4	True	True	False
331	118	9	71	1	1	1	0	0	0	29	0	0	0	0	-118	-9	-42	True	True	True
332	118	7	36	1	1	1	0	0	0	31	0	0	0	0	-118	-7	-5	True	True	False
337	19	8	57	0	0	0	0	7	0	64	0	0	0	0	-12	-8	7	True	True	False
338	35	9	56	1	1	1	0	1	0	38	0	0	0	0	-34	-9	-18	True	True	True
339	82	9	35	1	1	1	0	7	0	70	0	0	0	0	-75	-9	35	True	True	False
341	90	9	44	1	1	1	0	5	1	50	0	0	0	0	-85	-8	6	True	True	False
342	7	9	71	0	1	1	0	4	0	34	0	0	0	0	-3	-9	-37	False	True	True
343	28	10	70	1	0	1	1	4	1	17	0	0	0	0	-24	-9	-53	True	True	True
345	40	10	70	1	1	1	1	5	0	41	0	0	0	0	-35	-10	-29	True	True	True
347	109	9	38	1	1	1	0	4	1	38	0	0	0	0	-105	-8	0	True	True	False
349	94	9	56	1	1	1	0	4	2	19	0	0	0	0	-90	-7	-37	True	True	True
350	57	8	80	1	1	1	0	1	1	40	0	0	0	0	-56	-7	-40	True	True	True
351	99	7	80	1	1	1	0	9	1	45	0	0	0	0	-90	-6	-35	True	True	True
355	80	7	35	1	0	1	1	4	0	51	0	0	0	0	-76	-7	16	True	True	False
356	11	9	59	1	1	1	0	4	1	56	0	0	0	0	-7	-8	-3	True	True	False
358	26	9	52	1	1	1	0	0	0	52	0	0	0	0	-26	-9	0	True	True	False
360	35	9	49	1	1	1	0	4	1	39	0	0	0	0	-31	-8	-10	True	True	True
363	65	7	41	0	1	1	0	9	0	23	0	0	0	0	-56	-7	-18	True	True	True
366	26	9	39	0	0	1	0	4	1	61	0	0	0	0	-22	-8	22	True	True	False
367	116	8	39	1	1	1	1	3	0	37	0	0	0	0	-113	-8	-2	True	True	False
368	105	9	53	1	1	1	1	5	2	27	0	0	0	0	-100	-7	-26	True	True	True
371	71	7	39	0	0	1	0	0	0	39	0	0	0	0	-71	-7	0	True	True	False
373	93	7	38	1	1	1	0	4	0	49	0	0	0	0	-89	-7	11	True	True	False
374	79	10	56	1	0	1	0	10	1	42	0	0	0	0	-69	-9	-14	True	True	True
375	117	5	49	1	1	1	0	4	0	27	0	0	0	0	-113	-5	-22	True	True	True
376	8	10	53	1	1	1	0	4	0	48	0	0	0	0	-4	-10	-5	True	True	False
378	89	8	59	1	1	1	0	5	3	43	0	0	0	0	-84	-5	-16	True	True	True
380	93	7	47	1	1	1	0	2	2	40	0	0	0	0	-91	-5	-7	True	True	False
381	92	9	51	1	1	1	1	0	7	39	0	0	0	0	-92	-2	-12	True	False	True
385	111	10	46	1	1	1	0	0	1	48	0	0	0	0	-111	-9	2	True	True	False
386	97	7	40	1	1	1	0	8	1	59	0	0	0	0	-89	-6	19	True	True	False
387	88	9	64	1	1	1	0	1	1	20	0	0	0	0	-87	-8	-44	True	True	True
388	79	10	39	1	1	1	0	4	0	28	0	0	0	0	-75	-10	-11	True	True	True
389	36	9	45	1	1	1	1	4	0	20	0	0	0	0	-32	-9	-25	True	True	True
390	36	10	51	0	1	1	1	4	1	46	0	0	0	0	-32	-9	-5	True	True	False
391	54	9	40	1	1	1	0	8	1	45	0	0	0	0	-46	-8	5	True	True	False
393	24	10	47	1	1	1	0	2	0	58	0	0	0	0	-22	-10	11	True	True	False
394	52	10	51	1	1	1	0	4	1	37	0	0	0	0	-48	-9	-14	True	True	True
395	28	8	64	1	1	1	1	4	0	19	0	0	0	0	-24	-8	-45	True	True	True
397	96	10	43	1	1	1	0	4	2	56	0	0	0	0	-92	-8	13	True	True	False
399	58	10	47	1	1	1	1	4	0	35	0	0	0	0	-54	-10	-12	True	True	True
401	102	10	41	1	1	1	0	5	3	35	0	0	0	0	-97	-7	-6	True	True	False
402	7	10	56	1	1	1	0	9	0	50	0	0	0	0	2	-10	-6	False	True	False
403	51	9	61	1	1	1	0	8	2	20	0	0	0	0	-43	-7	-41	True	True	True
404	99	8	61	1	1	1	0	1	1	30	0	0	0	0	-98	-7	-31	True	True	True
405	9	10	45	1	0	0	0	1	7	28	0	0	0	0	-8	-3	-17	True	True	True
407	43	8	65	1	1	1	1	4	0	40	0	0	0	0	-39	-8	-25	True	True	True
408	45	8	41	1	1	1	0	0	0	33	0	0	0	0	-45	-8	-8	True	True	False
409	17	10	48	0	0	0	0	6	2	50	0	0	0	0	-11	-8	2	True	True	False
410	27	8	40	0	1	1	1	4	0	46	0	0	0	0	-23	-8	6	True	True	False
412	34	8	43	1	1	1	1	5	0	31	0	0	0	0	-29	-8	-12	True	True	True
413	117	8	40	1	1	1	0	4	1	57	0	0	0	0	-113	-7	17	True	True	False
415	111	10	41	1	1	1	0	4	2	52	0	0	0	0	-107	-8	11	True	True	False
416	62	9	39	1	1	1	0	2	0	61	0	0	0	0	-60	-9	22	True	True	False
417	73	9	62	0	0	1	0	3	1	54	0	0	0	0	-70	-8	-8	True	True	False
420	57	9	38	1	1	1	0	3	1	42	0	0	0	0	-54	-8	4	True	True	False
421	56	10	61	1	1	1	1	5	1	43	0	0	0	0	-51	-9	-18	True	True	True
422	45	9	38	1	1	1	0	2	1	68	0	0	0	0	-43	-8	30	True	True	False
423	47	10	61	1	1	1	0	10	2	36	0	0	0	0	-37	-8	-25	True	True	True
425	57	9	65	1	1	1	0	9	0	37	0	0	0	0	-48	-9	-28	True	True	True
426	71	9	38	1	1	1	0	4	6	50	0	0	0	0	-67	-3	12	True	True	False
429	61	9	41	1	1	1	0	4	1	25	0	0	0	0	-57	-8	-16	True	True	True
430	98	10	60	1	1	1	1	4	1	31	0	0	0	0	-94	-9	-29	True	True	True
433	44	10	51	1	1	1	1	4	0	59	0	0	0	0	-40	-10	8	True	True	False
435	50	10	59	1	1	1	0	4	2	38	0	0	0	0	-46	-8	-21	True	True	True
436	33	10	46	1	1	1	1	4	0	35	0	0	0	0	-29	-10	-11	True	True	True
437	74	9	40	0	1	1	0	5	3	32	0	0	0	0	-69	-6	-8	True	True	False
439	96	10	59	1	1	1	0	0	1	36	0	0	0	0	-96	-9	-23	True	True	True
440	70	10	52	0	0	1	0	5	1	33	0	0	0	0	-65	-9	-19	True	True	True
442	115	10	41	1	1	1	0	6	1	47	0	0	0	0	-109	-9	6	True	True	False
443	90	10	48	1	1	1	0	4	0	28	0	0	0	0	-86	-10	-20	True	True	True
445	49	10	51	1	1	1	1	4	0	54	0	0	0	0	-45	-10	3	True	True	False
448	11	10	63	1	1	1	0	0	1	33	0	0	0	0	-11	-9	-30	True	True	True
449	118	10	42	1	1	1	0	5	0	42	0	0	0	0	-113	-10	0	True	True	False
451	101	9	64	1	1	1	0	5	0	67	0	0	0	0	-96	-9	3	True	True	False
452	40	8	63	0	1	0	0	4	0	68	0	0	0	0	-36	-8	5	True	True	False
454	37	10	51	1	1	1	1	4	1	22	0	0	0	0	-33	-9	-29	True	True	True
455	10	9	49	1	1	1	0	10	0	57	0	0	0	0	0	-9	8	False	True	False
456	8	10	40	1	1	1	0	5	0	60	0	0	0	0	-3	-10	20	False	True	False
457	82	8	63	1	1	1	0	5	1	39	0	0	0	0	-77	-7	-24	True	True	True
459	61	9	55	1	1	1	0	4	1	25	0	0	0	0	-57	-8	-30	True	True	True
460	39	10	57	1	1	1	1	4	0	54	0	0	0	0	-35	-10	-3	True	True	False
461	94	10	60	1	1	1	0	3	1	35	0	0	0	0	-91	-9	-25	True	True	True
462	106	8	54	1	1	1	0	12	2	45	0	0	0	0	-94	-6	-9	True	True	False
463	118	9	53	1	1	1	0	4	0	45	0	0	0	0	-114	-9	-8	True	True	False
464	9	9	53	0	0	0	0	4	1	25	0	0	0	0	-5	-8	-28	True	True	True
465	114	8	53	1	1	1	0	0	1	40	0	0	0	0	-114	-7	-13	True	True	True
468	9	9	47	0	0	0	0	10	1	17	0	0	0	0	1	-8	-30	False	True	True
471	97	9	56	1	1	1	0	4	0	47	0	0	0	0	-93	-9	-9	True	True	False
472	67	9	59	0	0	1	0	4	1	21	0	0	0	0	-63	-8	-38	True	True	True
473	52	9	40	1	1	1	0	4	0	40	0	0	0	0	-48	-9	0	True	True	False
474	119	8	65	1	1	1	0	5	1	30	0	0	0	0	-114	-7	-35	True	True	True
475	95	9	56	1	1	1	1	6	0	58	0	0	0	0	-89	-9	2	True	True	False
476	94	8	66	1	1	1	0	4	1	53	0	0	0	0	-90	-7	-13	True	True	True
477	108	8	57	1	1	1	0	4	2	32	0	0	0	0	-104	-6	-25	True	True	True
478	27	9	56	1	1	1	1	4	0	52	0	0	0	0	-23	-9	-4	True	True	False
481	117	9	55	1	1	1	1	10	0	34	0	0	0	0	-107	-9	-21	True	True	True
482	66	8	66	0	1	1	0	6	1	53	0	0	0	0	-60	-7	-13	True	True	True
484	117	8	38	1	1	1	0	5	0	50	0	0	0	0	-112	-8	12	True	True	False
486	17	9	65	1	1	1	1	4	3	36	0	0	0	0	-13	-6	-29	True	True	True
487	83	9	49	1	1	1	0	4	0	44	0	0	0	0	-79	-9	-5	True	True	False
489	100	10	43	1	1	1	0	1	4	47	0	0	0	0	-99	-6	4	True	True	False
490	114	10	62	1	1	1	0	4	1	27	0	0	0	0	-110	-9	-35	True	True	True
491	26	9	44	1	0	1	0	3	5	45	0	0	0	0	-23	-4	1	True	True	False
493	56	9	45	1	1	1	0	1	1	37	0	0	0	0	-55	-8	-8	True	True	False
494	74	9	61	0	0	1	0	5	2	32	0	0	0	0	-69	-7	-29	True	True	True
496	92	9	58	1	1	1	0	10	1	22	0	0	0	0	-82	-8	-36	True	True	True
497	13	10	64	1	1	1	0	4	1	52	0	0	0	0	-9	-9	-12	True	True	True
498	18	9	48	1	1	0	1	2	1	19	0	0	0	0	-16	-8	-29	True	True	True
500	64	10	39	0	1	1	0	4	0	29	0	0	0	0	-60	-10	-10	True	True	True
503	37	8	40	1	1	1	1	4	2	20	0	0	0	0	-33	-6	-20	True	True	True
504	117	10	44	1	1	1	0	4	2	41	0	0	0	0	-113	-8	-3	True	True	False
505	43	10	53	1	1	0	1	10	2	20	0	0	0	0	-33	-8	-33	True	True	True
506	37	10	54	1	1	1	1	10	0	37	0	0	0	0	-27	-10	-17	True	True	True
507	94	9	47	1	1	1	0	5	0	75	0	0	0	0	-89	-9	28	True	True	False
508	101	10	46	1	0	1	0	6	0	21	0	0	0	0	-95	-10	-25	True	True	True
510	110	8	47	1	1	1	1	4	0	51	0	0	0	0	-106	-8	4	True	True	False
511	21	8	66	1	1	1	1	4	0	47	0	0	0	0	-17	-8	-19	True	True	True
512	70	9	54	0	0	1	0	7	2	37	0	0	0	0	-63	-7	-17	True	True	True
513	94	10	53	1	0	1	0	2	0	12	0	0	0	0	-92	-10	-41	True	True	True
514	10	8	46	1	1	1	0	6	0	31	0	0	0	0	-4	-8	-15	False	True	True
516	108	10	54	1	0	1	0	5	0	43	0	0	0	0	-103	-10	-11	True	True	True
517	26	9	63	1	1	1	0	0	3	33	0	0	0	0	-26	-6	-30	True	True	True
518	31	10	45	1	1	1	1	5	0	43	0	0	0	0	-26	-10	-2	True	True	False
519	61	9	65	1	0	1	0	4	2	9	0	0	0	0	-57	-7	-56	True	True	True
522	67	9	48	1	0	1	0	4	3	41	0	0	0	0	-63	-6	-7	True	True	False
523	31	8	44	1	1	1	1	4	0	43	0	0	0	0	-27	-8	-1	True	True	False
526	19	10	65	1	0	0	0	4	0	32	0	0	0	0	-15	-10	-33	True	True	True
528	61	9	65	1	1	1	0	0	1	43	0	0	0	0	-61	-8	-22	True	True	True
529	28	8	49	1	1	1	1	4	1	54	0	0	0	0	-24	-7	5	True	True	False
532	18	9	48	1	1	1	0	5	1	40	0	0	0	0	-13	-8	-8	True	True	False
536	70	8	57	0	0	1	0	3	2	47	0	0	0	0	-67	-6	-10	True	True	True
538	53	8	59	1	1	1	0		0	24	0	0	0	0		-8	-35	False	True	True
539	114	10	61	1	1	1	0		1	23	0	0	0	0		-9	-38	False	True	True
541	36	8	53	1	1	1	1		0	23	0	0	0	0		-8	-30	False	True	True
542	11	10	53	1	1	1	0		1	32	0	0	0	0		-9	-21	False	True	True
544	79	10	48	1	0	1	0		0	22	0	0	0	0		-10	-26	False	True	True
545	96	10	51	0	1	1	0		0	28	0	0	0	0		-10	-23	False	True	True
547	10	10	50	1	1	1	0	0	3	44	0	0	0	0	-10	-7	-6	True	True	False
548	97	10	45	1	1	1	0	5	1	52	0	0	0	0	-92	-9	7	True	True	False
551	42	8	45	1	1	1	1	5	1	42	0	0	0	0	-37	-7	-3	True	True	False
552	106	10	42	0	1	1	1	3	0	36	0	0	0	0	-103	-10	-6	True	True	False
554	119	10	60	1	1	1	0	4	1	29	0	0	0	0	-115	-9	-31	True	True	True
555	24	10	60	1	1	1	0	1	0	56	0	0	0	0	-23	-10	-4	True	True	False
557	58	8	65	1	1	1	0	0	1	27	0	0	0	0	-58	-7	-38	True	True	True
558	81	8	63	1	0	1	0	1	2	24	0	0	0	0	-80	-6	-39	True	True	True
560	70	9	39	0	0	1	0	9	0	60	0	0	0	0	-61	-9	21	True	True	False
561	64	9	40	0	1	1	0	5	0	25	0	0	0	0	-59	-9	-15	True	True	True
562	66	10	40	1	1	1	1	1	3	17	0	0	0	0	-65	-7	-23	True	True	True
563	63	10	53	0	0	1	0	5	1	32	0	0	0	0	-58	-9	-21	True	True	True
564	105	10	38	1	1	1	0	4	5	48	0	0	0	0	-101	-5	10	True	True	False
565	65	9	50	0	1	1	0	4	1	26	0	0	0	0	-61	-8	-24	True	True	True
566	96	9	63	1	1	1	0	8	0	31	0	0	0	0	-88	-9	-32	True	True	True
567	8	10	63	1	1	1	0	4	2	46	0	0	0	0	-4	-8	-17	True	True	True
568	46	8	62	1	1	1	0	3	0	34	0	0	0	0	-43	-8	-28	True	True	True
569	117	8	57	1	1	1	0	12	1	46	0	0	0	0	-105	-7	-11	True	True	True
571	23	9	64	1	1	1	1	4	0	53	0	0	0	0	-19	-9	-11	True	True	True
572	29	9	65	0	1	0	1	1	0	21	0	0	0	0	-28	-9	-44	True	True	True
573	88	8	49	1	1	1	0	7	0	38	0	0	0	0	-81	-8	-11	True	True	True
575	88	9	64	1	1	1	0	0	1	51	0	0	0	0	-88	-8	-13	True	True	True
576	91	8	51	1	1	1	0	4	2	42	0	0	0	0	-87	-6	-9	True	True	False
578	19	8	44	0	1	0	0	4	1	34	0	0	0	0	-15	-7	-10	True	True	True
579	75	8	40	0	0	1	0	10	0	36	0	0	0	0	-65	-8	-4	True	True	False
580	95	8	58	1	1	1	0	9	3	18	0	0	0	0	-86	-5	-40	True	True	True
581	115	8	44	1	1	1	1	4	2	36	0	0	0	0	-111	-6	-8	True	True	False
583	93	8	39	1	1	1	0	0	1	35	0	0	0	0	-93	-7	-4	True	True	False
584	58	9	38	1	1	1	0	14	0	69	0	0	0	0	-44	-9	31	True	True	False
587	39	9	49	1	1	1	1	4	2	17	0	0	0	0	-35	-7	-32	True	True	True
588	94	9	63	1	1	1	0	4	0	30	0	0	0	0	-90	-9	-33	True	True	True
589	63	9	40	0	1	1	0	4	1	56	0	0	0	0	-59	-8	16	True	True	False
590	27	10	51	0	1	0	0	4	2	39	0	0	0	0	-23	-8	-12	True	True	True
591	14	8	43	0	0	0	0	1	0	28	0	0	0	0	-13	-8	-15	True	True	True
594	87	8	54	1	1	1	1	4	0	34	0	0	0	0	-83	-8	-20	True	True	True
597	102	10	61	1	1	1	0	0	1	52	0	0	0	0	-102	-9	-9	True	True	False
598	70	10	50	1	0	1	0	0	1	43	0	0	0	0	-70	-9	-7	True	True	False
602	13	10	62	1	1	1	0	3	1	14	0	0	0	0	-10	-9	-48	True	True	True
603	61	9	50	1	1	1	0	5	1	44	0	0	0	0	-56	-8	-6	True	True	False
604	19	10	40	0	0	0	0	5	0	73	0	0	0	0	-14	-10	33	True	True	False
606	27	9	51	1	0	1	1	0	4	63	0	0	0	0	-27	-5	12	True	True	False
607	26	8	53	1	0	1	1	4	1	28	0	0	0	0	-22	-7	-25	True	True	True
608	98	9	54	1	1	1	1	4	1	61	0	0	0	0	-94	-8	7	True	True	False
609	82	10	49	1	1	1	0	1	1	26	0	0	0	0	-81	-9	-23	True	True	True
610	74	8	57	0	0	1	0	0	2	42	0	0	0	0	-74	-6	-15	True	True	True
611	110	9	60	1	1	1	1	4	1	28	0	0	0	0	-106	-8	-32	True	True	True
612	38	10	57	1	1	1	0	2	0	18	0	0	0	0	-36	-10	-39	True	True	True
614	49	10	43	1	1	1	1	5	2	49	0	0	0	0	-44	-8	6	True	True	False
615	88	9	41	1	1	1	0	4	4	17	0	0	0	0	-84	-5	-24	True	True	True
616	70	10	43	0	0	1	0	0	1	15	0	0	0	0	-70	-9	-28	True	True	True
619	16	8	51	1	1	1	1	4	0	42	0	0	0	0	-12	-8	-9	True	True	False
620	55	8	40	1	1	1	1	0	3	31	0	0	0	0	-55	-5	-9	True	True	False
621	99	10	62	1	1	1	1	9	4	36	0	0	0	0	-90	-6	-26	True	True	True
622	38	8	58	0	0	1	0	8	1	41	0	0	0	0	-30	-7	-17	True	True	True
625	111	9	40	1	1	1	0	1	0	36	0	0	0	0	-110	-9	-4	True	True	False
626	32	8	65	1	1	1	1	10	1	27	0	0	0	0	-22	-7	-38	True	True	True
627	75	10	42	0	0	1	0	3	5	39	0	0	0	0	-72	-5	-3	True	True	False
628	76	8	60	1	0	1	0	2	1	33	0	0	0	0	-74	-7	-27	True	True	True
629	111	8	43	1	1	1	1	5	2	62	0	0	0	0	-106	-6	19	True	True	False
630	30	9	47	1	1	0	0	4	0	20	0	0	0	0	-26	-9	-27	True	True	True
631	82	10	50	1	1	1	0	5	2	16	0	0	0	0	-77	-8	-34	True	True	True
632	113	9	60	1	1	1	0	4	1	35	0	0	0	0	-109	-8	-25	True	True	True
634	44	9	56	1	1	1	0	2	2	50	0	0	0	0	-42	-7	-6	True	True	False
635	7	9	41	1	0	1	0	4	0	61	0	0	0	0	-3	-9	20	False	True	False
637	48	8	64	1	1	1	0	8	2	43	0	0	0	0	-40	-6	-21	True	True	True
638	87	8	45	1	1	1	1	10	3	30	0	0	0	0	-77	-5	-15	True	True	True
639	43	9	62	1	1	1	1	4	1	29	0	0	0	0	-39	-8	-33	True	True	True
640	26	8	48	0	1	1	1	5	0	58	0	0	0	0	-21	-8	10	True	True	False
641	103	10	42	1	1	1	0	5	3	22	0	0	0	0	-98	-7	-20	True	True	True
642	71	9	54	0	0	1	0	4	1	15	0	0	0	0	-67	-8	-39	True	True	True
643	81	10	56	1	0	1	0	4	0	25	0	0	0	0	-77	-10	-31	True	True	True
644	75	9	53	0	0	1	1	4	1	45	0	0	0	0	-71	-8	-8	True	True	False
645	72	8	43	0	0	1	0	5	1	27	0	0	0	0	-67	-7	-16	True	True	True
646	84	10	42	1	1	1	0	4	3	23	0	0	0	0	-80	-7	-19	True	True	True
647	92	10	65	1	1	1	0	10	2	40	0	0	0	0	-82	-8	-25	True	True	True
648	82	8	40	1	1	1	0	1	4	20	0	0	0	0	-81	-4	-20	True	True	True
649	47	8	43	1	1	1	0	1	1	28	0	0	0	0	-46	-7	-15	True	True	True
650	29	10	60	1	0	1	1	4	1	64	0	0	0	0	-25	-9	4	True	True	False
651	13	8	52	1	1	1	0	4	0	47	0	0	0	0	-9	-8	-5	True	True	False
653	46	8	43	1	1	1	0	4	0	33	0	0	0	0	-42	-8	-10	True	True	True
655	93	10	44	1	1	1	0	3	0	46	0	0	0	0	-90	-10	2	True	True	False
656	15	8	39	0	0	0	0	4	0	39	0	0	0	0	-11	-8	0	True	True	False
658	83	10	43	1	1	1	0	2	4	44	0	0	0	0	-81	-6	1	True	True	False
659	84	9	55	1	1	1	0	4	0	31	0	0	0	0	-80	-9	-24	True	True	True
661	65	9	66	0	1	1	0	0	1	45	0	0	0	0	-65	-8	-21	True	True	True
662	53	9	48	1	1	1	0	5	1	45	0	0	0	0	-48	-8	-3	True	True	False
663	21	8	52	1	1	1	1	4	2	37	0	0	0	0	-17	-6	-15	True	True	True
665	111	9	40	1	1	1	1	13	0	12	0	0	0	0	-98	-9	-28	True	True	True
666	37	10	56	1	1	1	1	2	0	33	0	0	0	0	-35	-10	-23	True	True	True
668	119	8	62	1	1	1	0	9	1	17	0	0	0	0	-110	-7	-45	True	True	True
672	68	9	38	0	0	1	0	5	2	17	0	0	0	0	-63	-7	-21	True	True	True
673	106	8	48	1	1	1	1	4	2	27	0	0	0	0	-102	-6	-21	True	True	True
675	86	10	55	1	1	1	1	3	0	14	0	0	0	0	-83	-10	-41	True	True	True
676	72	10	65	0	0	1	0	3	0	29	0	0	0	0	-69	-10	-36	True	True	True
678	106	8	63	1	1	1	1	5	0	34	0	0	0	0	-101	-8	-29	True	True	True
679	65	8	53	1	1	1	0	0	1	30	0	0	0	0	-65	-7	-23	True	True	True
680	82	8	40	1	1	1	0	0	3	55	0	0	0	0	-82	-5	15	True	True	False
682	81	10	64	1	0	1	0	10	1	42	0	0	0	0	-71	-9	-22	True	True	True
683	59	10	65	1	1	1	1	5	0	19	0	0	0	0	-54	-10	-46	True	True	True
684	47	9	60	1	1	1	0	4	3	17	0	0	0	0	-43	-6	-43	True	True	True
685	112	9	50	1	1	1	1	4	1	58	0	0	0	0	-108	-8	8	True	True	False
688	79	9	49	1	0	1	0	3	1	46	0	0	0	0	-76	-8	-3	True	True	False
689	104	9	45	1	1	1	0	4	1	44	0	0	0	0	-100	-8	-1	True	True	False
690	80	9	47	1	0	1	0	4	1	40	0	0	0	0	-76	-8	-7	True	True	False
692	98	10	40	1	1	1	1	4	1	43	0	0	0	0	-94	-9	3	True	True	False
693	87	9	57	1	1	1	1	4	1	13	0	0	0	0	-83	-8	-44	True	True	True
694	26	8	64	1	0	0	1	8	0	20	0	0	0	0	-18	-8	-44	True	True	True
695	119	8	44	1	1	1	0	4	0	34	0	0	0	0	-115	-8	-10	True	True	True
697	18	8	57	1	1	1	1	4	2	40	0	0	0	0	-14	-6	-17	True	True	True
698	31	8	42	1	1	1	1	5	1	32	0	0	0	0	-26	-7	-10	True	True	True
699	92	8	39	1	1	1	0	6	0	44	0	0	0	0	-86	-8	5	True	True	False
700	92	9	59	1	1	1	0	9	1	27	0	0	0	0	-83	-8	-32	True	True	True
701	72	8	62	0	1	1	0	4	3	23	0	0	0	0	-68	-5	-39	True	True	True
702	24	9	61	1	1	1	0	4	1	64	0	0	0	0	-20	-8	3	True	True	False
703	64	10	43	0	1	1	1	4	1	41	0	0	0	0	-60	-9	-2	True	True	False
704	63	8	62	0	1	1	1	4	0	36	0	0	0	0	-59	-8	-26	True	True	True
705	21	10	64	1	1	0	1	4	1	36	0	0	0	0	-17	-9	-28	True	True	True
706	37	8	62	1	1	1	1	4	3	24	0	0	0	0	-33	-5	-38	True	True	True
708	63	8	59	0	1	1	0	5	1	30	0	0	0	0	-58	-7	-29	True	True	True
710	70	10	50	0	1	1	0	4	1	33	0	0	0	0	-66	-9	-17	True	True	True
711	30	10	65	1	0	1	1	10	0	23	0	0	0	0	-20	-10	-42	True	True	True
713	117	8	42	1	1	1	1	4	1	9	0	0	0	0	-113	-7	-33	True	True	True
717	35	8	54	1	1	1	0	10	1	51	0	0	0	0	-25	-7	-3	True	True	False
719	59	8	62	1	1	1	0	4	1	36	0	0	0	0	-55	-7	-26	True	True	True
721	67	9	44	0	1	1	0	4	4	31	0	0	0	0	-63	-5	-13	True	True	True
722	74	10	55	0	0	1	0	2	1	37	0	0	0	0	-72	-9	-18	True	True	True
723	47	9	51	1	1	1	0	4	0	47	0	0	0	0	-43	-9	-4	True	True	False
725	78	9	53	1	0	1	0	4	0	41	0	0	0	0	-74	-9	-12	True	True	True
726	94	8	54	1	1	1	0	6	0	12	0	0	0	0	-88	-8	-42	True	True	True
727	76	9	45	1	1	1	0	4	3	57	0	0	0	0	-72	-6	12	True	True	False
728	102	8	62	1	1	1	1	4	0	46	0	0	0	0	-98	-8	-16	True	True	True
729	91	10	55	1	1	1	0	4	0	24	0	0	0	0	-87	-10	-31	True	True	True
730	17	8	55	0	1	0	1	4	1	26	0	0	0	0	-13	-7	-29	True	True	True
731	34	9	44	1	1	1	1	4	0	36	0	0	0	0	-30	-9	-8	True	True	False
732	54	10	49	1	1	1	0	2	1	34	0	0	0	0	-52	-9	-15	True	True	True
735	70	9	43	0	1	1	1	2	0	39	0	0	0	0	-68	-9	-4	True	True	False
737	13	8	61	1	0	1	0	4	1	41	0	0	0	0	-9	-7	-20	True	True	True
738	28	10	44	1	1	1	1	4	1	55	0	0	0	0	-24	-9	11	True	True	False
739	52	10	46	1	1	1	0	4	0	48	0	0	0	0	-48	-10	2	True	True	False
740	71	10	40	0	0	1	0	4	0	22	0	0	0	0	-67	-10	-18	True	True	True
741	67	10	42	1	1	1	0	3	0	66	0	0	0	0	-64	-10	24	True	True	False
742	89	9	53	1	1	1	0	11	0	15	0	0	0	0	-78	-9	-38	True	True	True
743	102	10	53	1	1	1	1	4	1	36	0	0	0	0	-98	-9	-17	True	True	True
744	96	10	61	1	1	1	0	4	1	39	0	0	0	0	-92	-9	-22	True	True	True
745	102	8	39	1	1	1	1	4	0	38	0	0	0	0	-98	-8	-1	True	True	False
748	32	8	44	1	1	1	1	4	0	44	0	0	0	0	-28	-8	0	True	True	False
749	86	10	66	1	1	1	0	9	0	37	0	0	0	0	-77	-10	-29	True	True	True
750	116	9	63	1	1	1	0	4	0	17	0	0	0	0	-112	-9	-46	True	True	True
752	88	9	63	1	1	1	0	6	3	28	0	0	0	0	-82	-6	-35	True	True	True
753	17	10	44	1	0	1	1	4	0	76	0	0	0	0	-13	-10	32	True	True	False
755	35	8	45	1	1	1	0	1	3	35	0	0	0	0	-34	-5	-10	True	True	True
756	14	10	58	0	0	0	0	4	1	52	0	0	0	0	-10	-9	-6	True	True	False
757	56	9	52	1	1	1	1	4	1	60	0	0	0	0	-52	-8	8	True	True	False
758	84	10	57	1	1	1	0	0	0	71	0	0	0	0	-84	-10	14	True	True	False
762	20	8	56	0	0	0	0	4	0	50	0	0	0	0	-16	-8	-6	True	True	False
763	22	10	53	1	1	1	0	5	1	42	0	0	0	0	-17	-9	-11	True	True	True
765	11	10	65	1	1	1	0	0	4	63	0	0	0	0	-11	-6	-2	True	True	False
766	57	10	54	1	1	1	1	4	1	39	0	0	0	0	-53	-9	-15	True	True	True
767	18	9	56	1	1	1	1	5	0	44	0	0	0	0	-13	-9	-12	True	True	True
769	22	9	42	1	1	1	0	2	0	29	0	0	0	0	-20	-9	-13	True	True	True
771	35	8	58	1	1	1	1	4	1	54	0	0	0	0	-31	-7	-4	True	True	False
772	43	10	45	1	0	1	0	0	5	22	0	0	0	0	-43	-5	-23	True	True	True
773	58	10	38	1	1	1	1	3	1	29	0	0	0	0	-55	-9	-9	True	True	False
774	48	8	39	1	1	1	0	4	1	43	0	0	0	0	-44	-7	4	True	True	False
776	103	10	61	1	1	1	1	4	0	33	0	0	0	0	-99	-10	-28	True	True	True
777	15	8	58	0	0	0	0	6	0	48	0	0	0	0	-9	-8	-10	True	True	True
778	114	8	50	1	1	1	1	13	0	32	0	0	0	0	-101	-8	-18	True	True	True
779	27	8	47	1	1	1	1	4	0	55	0	0	0	0	-23	-8	8	True	True	False
780	73	10	48	0	0	1	0	8	0	25	0	0	0	0	-65	-10	-23	True	True	True
781	46	9	57	1	1	1	0	8	1	17	0	0	0	0	-38	-8	-40	True	True	True
782	58	8	51	1	1	1	0	4	1	36	0	0	0	0	-54	-7	-15	True	True	True
783	54	9	55	1	1	1	0	4	2	22	0	0	0	0	-50	-7	-33	True	True	True
784	101	9	43	1	1	1	1	5	0	21	0	0	0	0	-96	-9	-22	True	True	True
786	68	8	60	0	0	1	0	5	3	14	0	0	0	0	-63	-5	-46	True	True	True
787	13	9	42	1	1	1	0	8	2	44	0	0	0	0	-5	-7	2	False	True	False
788	104	8	38	1	1	1	0	7	1	30	0	0	0	0	-97	-7	-8	True	True	False
790	10	10	51	1	1	1	0	4	1	34	0	0	0	0	-6	-9	-17	True	True	True
792	107	8	39	1	1	1	0	4	1	27	0	0	0	0	-103	-7	-12	True	True	True
793	56	9	54	1	1	1	1	5	1	57	0	0	0	0	-51	-8	3	True	True	False
798	115	9	51	1	1	1	0	12	1	18	0	0	0	0	-103	-8	-33	True	True	True
799	85	9	50	1	1	1	0	12	1	33	0	0	0	0	-73	-8	-17	True	True	True
800	50	8	65	1	1	1	0	4	4	60	0	0	0	0	-46	-4	-5	True	True	False
802	25	8	49	0	0	0	0	4	0	31	0	0	0	0	-21	-8	-18	True	True	True
803	73	8	40	1	0	1	1	4	0	42	0	0	0	0	-69	-8	2	True	True	False
804	73	10	55	0	0	1	0	1	1	18	0	0	0	0	-72	-9	-37	True	True	True
806	108	8	64	1	1	1	0	1	0	27	0	0	0	0	-107	-8	-37	True	True	True
807	42	9	59	1	1	0	0	4	6	41	0	0	0	0	-38	-3	-18	True	True	True
808	91	9	62	1	1	1	0	4	1	18	0	0	0	0	-87	-8	-44	True	True	True
810	72	10	66	0	0	1	0	3	1	35	0	0	0	0	-69	-9	-31	True	True	True
811	8	9	41	1	1	1	0	4	1	40	0	0	0	0	-4	-8	-1	True	True	False
812	11	8	52	1	1	1	0	4	1	23	0	0	0	0	-7	-7	-29	True	True	True
813	53	10	52	1	1	1	0	4	1	31	0	0	0	0	-49	-9	-21	True	True	True
814	58	9	43	1	1	1	0	4	0	34	0	0	0	0	-54	-9	-9	True	True	False
816	7	9	62	1	1	1	0	8	0	41	0	0	0	0	1	-9	-21	False	True	True
817	63	10	63	1	1	1	0	0	2	35	0	0	0	0	-63	-8	-28	True	True	True
819	55	8	54	1	1	1	1	4	2	41	0	0	0	0	-51	-6	-13	True	True	True
820	32	10	61	0	1	1	1	5	0	27	0	0	0	0	-27	-10	-34	True	True	True
821	112	8	38	1	0	0	0	4	1	48	0	0	0	0	-108	-7	10	True	True	False
822	53	10	41	1	1	1	0	3	1	50	0	0	0	0	-50	-9	9	True	True	False
823	81	8	66	1	0	1	0	4	4	45	0	0	0	0	-77	-4	-21	True	True	True
825	41	8	63	1	1	0	0	1	0	41	0	0	0	0	-40	-8	-22	True	True	True
827	23	10	40	1	1	1	0	5	0	20	0	0	0	0	-18	-10	-20	True	True	True
829	32	9	53	1	1	1	1	7	0	48	0	0	0	0	-25	-9	-5	True	True	False
830	62	10	53	1	1	1	1	0	0	19	0	0	0	0	-62	-10	-34	True	True	True
832	83	8	41	1	1	1	0	4	0	42	0	0	0	0	-79	-8	1	True	True	False
833	105	8	64	1	1	1	0	4	1	46	0	0	0	0	-101	-7	-18	True	True	True
834	104	9	66	1	1	1	0	4	0	25	0	0	0	0	-100	-9	-41	True	True	True
835	18	10	62	1	1	0	1	8	1	23	0	0	0	0	-10	-9	-39	True	True	True
836	73	9	52	0	0	1	0	4	0	34	0	0	0	0	-69	-9	-18	True	True	True
837	69	10	52	0	0	1	1	4	0	16	0	0	0	0	-65	-10	-36	True	True	True
838	119	9	62	1	1	1	0	5	1	40	0	0	0	0	-114	-8	-22	True	True	True
839	44	10	65	1	1	1	0	11	5	39	0	0	0	0	-33	-5	-26	True	True	True
840	10	9	59	1	0	1	0	4	1	44	0	0	0	0	-6	-8	-15	True	True	True
842	46	8	56	1	1	1	0	5	1	35	0	0	0	0	-41	-7	-21	True	True	True
843	38	10	52	1	1	1	0	4	1	66	0	0	0	0	-34	-9	14	True	True	False
844	72	9	44	0	0	1	0	5	0	53	0	0	0	0	-67	-9	9	True	True	False
845	49	10	48	1	1	1	0	4	1	27	0	0	0	0	-45	-9	-21	True	True	True
847	28	8	63	0	1	1	1	4	0	45	0	0	0	0	-24	-8	-18	True	True	True
849	63	8	39	1	1	1	0	4	0	34	0	0	0	0	-59	-8	-5	True	True	False
850	27	8	45	1	1	0	0	4	3	42	0	0	0	0	-23	-5	-3	True	True	False
851	94	8	55	1	1	1	0	0	4	16	0	0	0	0	-94	-4	-39	True	True	True
852	17	8	66	0	1	1	1	5	1	26	0	0	0	0	-12	-7	-40	True	True	True
853	8	10	38	1	1	1	1	4	3	31	0	0	0	0	-4	-7	-7	True	True	False
854	106	10	48	1	1	1	1	1	1	45	0	0	0	0	-105	-9	-3	True	True	False
855	13	10	49	1	1	1	0	0	0	42	0	0	0	0	-13	-10	-7	True	True	False
858	119	9	42	1	1	1	0	4	4	29	0	0	0	0	-115	-5	-13	True	True	True
859	38	8	55	1	0	1	0	5	0	48	0	0	0	0	-33	-8	-7	True	True	False
861	16	8	50	1	1	1	1	7	1	16	0	0	0	0	-9	-7	-34	True	True	True
862	74	9	65	0	0	1	0	0	1	42	0	0	0	0	-74	-8	-23	True	True	True
865	13	10	45	1	1	1	0	2	1	9	0	0	0	0	-11	-9	-36	True	True	True
866	16	8	51	0	1	1	1	6	1	20	0	0	0	0	-10	-7	-31	True	True	True
867	94	10	61	1	1	1	0	4	0	63	0	0	0	0	-90	-10	2	True	True	False
869	53	10	43	1	1	1	0	5	1	33	0	0	0	0	-48	-9	-10	True	True	True
872	82	8	60	1	0	1	0	4	0	30	0	0	0	0	-78	-8	-30	True	True	True
873	81	8	41	1	0	1	1	4	1	35	0	0	0	0	-77	-7	-6	True	True	False
874	64	8	50	0	1	1	0	2	2	39	0	0	0	0	-62	-6	-11	True	True	True
875	116	10	65	1	1	1	0	7	4	36	0	0	0	0	-109	-6	-29	True	True	True
876	29	8	48	1	1	1	1	2	1	44	0	0	0	0	-27	-7	-4	True	True	False
878	51	10	38	1	1	0	0	4	0	36	0	0	0	0	-47	-10	-2	True	True	False
879	60	9	60	1	1	1	0	4	1	27	0	0	0	0	-56	-8	-33	True	True	True
881	37	9	66	1	1	1	1	4	0	18	0	0	0	0	-33	-9	-48	True	True	True
882	82	9	56	1	0	1	0	4	0	32	0	0	0	0	-78	-9	-24	True	True	True
885	97	10	52	1	1	1	0	5	1	26	0	0	0	0	-92	-9	-26	True	True	True
886	69	8	65	0	0	1	1	6	0	40	0	0	0	0	-63	-8	-25	True	True	True
887	64	8	45	0	1	1	0	0	2	42	0	0	0	0	-64	-6	-3	True	True	False
888	70	10	44	0	1	1	1	4	0	22	0	0	0	0	-66	-10	-22	True	True	True
889	68	10	41	0	0	1	0	0	1	24	0	0	0	0	-68	-9	-17	True	True	True
890	107	10	55	1	1	1	0	5	0	13	0	0	0	0	-102	-10	-42	True	True	True
891	40	10	50	1	0	1	1	5	0	29	0	0	0	0	-35	-10	-21	True	True	True
892	78	8	58	1	0	1	0	10	3	39	0	0	0	0	-68	-5	-19	True	True	True
895	66	10	39	0	1	1	0	1	1	33	0	0	0	0	-65	-9	-6	True	True	False
896	22	9	43	1	1	0	0	4	0	43	0	0	0	0	-18	-9	0	True	True	False
897	65	10	62	1	1	1	0	1	4	25	0	0	0	0	-64	-6	-37	True	True	True
899	82	8	62	1	0	1	0	1	0	11	0	0	0	0	-81	-8	-51	True	True	True
900	97	10	40	1	1	1	0	5	1	15	0	0	0	0	-92	-9	-25	True	True	True
901	23	10	47	0	1	0	1	5	1	48	0	0	0	0	-18	-9	1	True	True	False
902	21	9	65	1	1	1	1	7	0	45	0	0	0	0	-14	-9	-20	True	True	True
903	67	9	59	0	1	1	0	6	1	47	0	0	0	0	-61	-8	-12	True	True	True
904	8	8	53	1	1	1	0	4	3	33	0	0	0	0	-4	-5	-20	True	True	True
906	58	9	65	1	1	1	0	4	0	40	0	0	0	0	-54	-9	-25	True	True	True
907	22	9	50	0	1	0	1	1	1	60	0	0	0	0	-21	-8	10	True	True	False
908	20	10	65	0	0	0	0	4	0	36	0	0	0	0	-16	-10	-29	True	True	True
910	101	10	61	1	1	1	0	7	1	27	0	0	0	0	-94	-9	-34	True	True	True
911	73	9	57	0	0	1	0	9	0	29	0	0	0	0	-64	-9	-28	True	True	True
912	92	10	50	1	1	1	0	4	1	30	0	0	0	0	-88	-9	-20	True	True	True
916	97	10	49	1	1	1	0	1	1	27	0	0	0	0	-96	-9	-22	True	True	True
917	51	10	61	1	1	1	0	13	2	33	0	0	0	0	-38	-8	-28	True	True	True
919	79	8	39	1	0	1	0	5	2	23	0	0	0	0	-74	-6	-16	True	True	True

## Sheet: Concomitant_Meds_CORRECTED
Year	N	Tramadol_Tapentadol_pct	Benzodiazepines_pct	SSRIs_pct	Gabapentinoids_pct
0	638	89.7	78.8	77.7	31.3
1	638	18.4	19.3	19.8	6.3
2	638	14.2	13.7	14.9	8
3	638	12.8	13.9	11.8	4.5
4	638	14.1	12.3	14.7	5.1
5	638	10.7	10.4	9.6	4.5
6	638	13	13.6	10.6	4.2
7	638	12.6	11.8	13.1	5
8	638	11.6	11.8	10.4	6.4
9	638	12.8	12	14.1	6.5
10	638	5.6	5.3	5.8	0.6

## Sheet: VERIFIED_NUMBERS
Metric	Value	Unit/Note
PRIMARY OUTCOMES (Completers n=638)
MMEQ Baseline	62.8 ± 35.7	mg/day
MMEQ Year 10	6.4 ± 7.1	mg/day
MMEQ Change	-56.4 (-89.8%)
NRS Baseline	8.71 ± 1.23
NRS Year 10	1.37 ± 1.71
NRS Change	-7.34 (-84.2%)
ODI Baseline	52.9 ± 11.9	%
ODI Year 10	36.8 ± 14.9	%
ODI Change	-16.1 points (-30.4%)
POLYPHARMACY (Completers n=638)
Tramadol/Tapentadol	89.7% → 5.6%	-84.0 pp
Benzodiazepines	78.8% → 5.3%	-73.5 pp
SSRIs	77.7% → 5.8%	-71.9 pp
Gabapentinoids	31.3% → 0.6%	-30.7 pp
MCID RESPONDERS
MMEQ ≥50%	582/638	91.2%
NRS ≥30%	616/638	96.6%
ODI ≥10pt	396/638	62.1%

## Sheet: Data_Dictionary
Variable	Description
Subject_ID	Unique patient ID (1-1000)
Age	Age at enrollment (years)
Sex	1=Male, 2=Female, 3=Transgender female
BMI	Body Mass Index (kg/m²)
Pain_Duration_Years	Duration of chronic pain (years)
ICD10	Primary diagnosis code
Dropout_Year	Year dropped out (11=completed all 10 years)
Year	Years since enrollment (0-10)
MMEQ	Morphine Milligram Equivalents (mg/day)
NRS	Numeric Rating Scale (0-10)
ODI	Oswestry Disability Index (%)
Cannabis_g_month	Total cannabis (g/month)
THC_g_month	THC content (g/month)
CBD_g_month	CBD content (g/month)
pp	Percentage points
